# Supplementary material for: Global Stabilization of Boolean Networks to Control the Heterogeneity of Cellular Responses
Source: Front Physiol. 2018 Jul 17;9:774. doi: 10.3389/fphys.2018.00774 (PMC6060448; doi:10.3389/fphys.2018.00774)
Supplement: Supplementary Dataset S1 — Results of FVS control for the MAPK signaling network. [file Data_Sheet_1.XLSX]

## Sheet: r9_RealAttractors
Average Activity
AKT	AP1	Apoptosis	ATF2	ATM	BCL2	CREB	DNA_damage	DUSP1	EGFR	EGFR_stimulus	ELK1	ERK	FGFR3	FGFR3_stimulus	FOS	FOXO3	FRS2	GAB1	GADD45	GRB2	Growth_Arrest	JNK	JUN	MAP3K1_3	MAX	MDM2	MEK1_2	MSK	MTK1	MYC	p14	p21	p38	p53	p70	PDK1	PI3K	PKC	PLCG	PPP2CA	Proliferation	PTEN	RAF	RAS	RSK	SMAD	SOS	SPRY	TAK1
0.29118	0.924543	0.586575	0.924543	0.49773	0.245835	0.924543	0.49773	0.924543	1	0.49912	0.924543	0.0278137	0	0.49825	0.0051475	0.678708	0	1	0.849085	1	0.49773	0.924543	0.924543	1	0.924543	0.78891	0.0278137	0.924543	0.849085	0.924543	0	0.49773	0.924543	0.70882	0.0278137	1	1	1	1	0.924543	0.02489	0.70882	0.70882	1	0.0278137	0.4983	0.972186	0.0278137	0.4983
Attractor	1
Type	:	point
Ratio	:	0.06208
AKT	AP1	Apoptosis	ATF2	ATM	BCL2	CREB	DNA_damage	DUSP1	EGFR	EGFR_stimulus	ELK1	ERK	FGFR3	FGFR3_stimulus	FOS	FOXO3	FRS2	GAB1	GADD45	GRB2	Growth_Arrest	JNK	JUN	MAP3K1_3	MAX	MDM2	MEK1_2	MSK	MTK1	MYC	p14	p21	p38	p53	p70	PDK1	PI3K	PKC	PLCG	PPP2CA	Proliferation	PTEN	RAF	RAS	RSK	SMAD	SOS	SPRY	TAK1
0	1	1	1	1	0	1	1	1	1	0	1	0	0	0	0	1	0	1	1	1	1	1	1	1	1	1	0	1	1	1	0	1	1	1	0	1	1	1	1	1	0	1	1	1	0	0	1	0	0
Attractor	2
Type	:	point
Ratio	:	0.06219
AKT	AP1	Apoptosis	ATF2	ATM	BCL2	CREB	DNA_damage	DUSP1	EGFR	EGFR_stimulus	ELK1	ERK	FGFR3	FGFR3_stimulus	FOS	FOXO3	FRS2	GAB1	GADD45	GRB2	Growth_Arrest	JNK	JUN	MAP3K1_3	MAX	MDM2	MEK1_2	MSK	MTK1	MYC	p14	p21	p38	p53	p70	PDK1	PI3K	PKC	PLCG	PPP2CA	Proliferation	PTEN	RAF	RAS	RSK	SMAD	SOS	SPRY	TAK1
0	1	1	1	1	0	1	1	1	1	0	1	0	0	0	0	1	0	1	1	1	1	1	1	1	1	1	0	1	1	1	0	1	1	1	0	1	1	1	1	1	0	1	1	1	0	1	1	0	1
Attractor	3
Type	:	cyclic
Ratio	:	0.02624
AKT	AP1	Apoptosis	ATF2	ATM	BCL2	CREB	DNA_damage	DUSP1	EGFR	EGFR_stimulus	ELK1	ERK	FGFR3	FGFR3_stimulus	FOS	FOXO3	FRS2	GAB1	GADD45	GRB2	Growth_Arrest	JNK	JUN	MAP3K1_3	MAX	MDM2	MEK1_2	MSK	MTK1	MYC	p14	p21	p38	p53	p70	PDK1	PI3K	PKC	PLCG	PPP2CA	Proliferation	PTEN	RAF	RAS	RSK	SMAD	SOS	SPRY	TAK1
0	0	0	0	0	0	0	0	1	1	1	0	0	0	0	0	0	0	1	0	1	0	1	0	1	0	0	0	0	1	0	0	0	1	0	0	1	1	1	1	0	0	0	1	1	0	0	1	0	0
1	0	0	1	0	0	0	0	0	1	1	1	0	0	0	0	1	0	1	0	1	0	1	1	1	1	0	1	1	0	0	0	0	1	1	0	1	1	1	1	1	0	0	1	1	0	0	1	0	0
1	1	1	1	0	0	1	0	0	1	1	1	1	0	0	0	0	0	1	1	1	0	1	1	1	1	1	0	1	0	1	0	0	1	1	0	1	1	1	1	1	0	1	0	1	0	0	1	0	0
0	1	0	1	0	1	1	0	1	1	1	1	0	0	0	0	0	0	1	1	1	0	1	1	1	1	1	0	1	1	1	0	0	1	0	1	1	1	1	1	1	0	1	0	1	1	0	1	1	0
0	1	0	1	0	0	1	0	1	1	1	1	0	0	0	0	1	0	1	0	1	0	1	1	1	1	0	0	1	1	1	0	0	1	0	0	1	1	1	1	1	1	0	1	1	0	0	0	0	0
1	1	0	1	0	0	1	0	1	1	1	1	0	0	0	0	1	0	1	0	1	0	1	1	1	1	0	0	1	0	1	0	0	1	1	0	1	1	1	1	1	0	0	1	1	0	0	1	0	0
1	1	1	1	0	1	1	0	1	1	1	1	0	0	0	0	0	0	1	1	1	0	0	1	1	1	1	0	1	0	1	0	0	0	1	0	1	1	1	1	1	0	1	0	1	0	0	1	0	0
0	1	0	0	0	1	1	0	1	1	1	0	0	0	0	0	0	0	1	1	1	0	0	0	1	0	1	0	0	1	1	0	0	0	0	0	1	1	1	1	0	0	1	0	1	0	0	1	0	0
Attractor	4
Type	:	cyclic
Ratio	:	0.04942
AKT	AP1	Apoptosis	ATF2	ATM	BCL2	CREB	DNA_damage	DUSP1	EGFR	EGFR_stimulus	ELK1	ERK	FGFR3	FGFR3_stimulus	FOS	FOXO3	FRS2	GAB1	GADD45	GRB2	Growth_Arrest	JNK	JUN	MAP3K1_3	MAX	MDM2	MEK1_2	MSK	MTK1	MYC	p14	p21	p38	p53	p70	PDK1	PI3K	PKC	PLCG	PPP2CA	Proliferation	PTEN	RAF	RAS	RSK	SMAD	SOS	SPRY	TAK1
0	1	0	1	0	0	1	0	1	1	0	1	0	0	1	0	1	0	1	1	1	0	1	1	1	1	0	0	1	1	1	0	0	1	0	0	1	1	1	1	1	0	0	1	1	0	1	1	0	1
1	1	0	1	0	0	1	0	1	1	0	1	0	0	1	0	1	0	1	1	1	0	1	1	1	1	0	0	1	1	1	0	0	1	1	0	1	1	1	1	1	0	0	1	1	0	1	1	0	1
1	1	1	1	0	1	1	0	1	1	0	1	0	0	1	0	0	0	1	1	1	0	1	1	1	1	1	0	1	1	1	0	0	1	1	0	1	1	1	1	1	0	1	0	1	0	1	1	0	1
0	1	0	1	0	1	1	0	1	1	0	1	0	0	1	0	0	0	1	1	1	0	1	1	1	1	1	0	1	1	1	0	0	1	0	0	1	1	1	1	1	0	1	0	1	0	1	1	0	1
Attractor	5
Type	:	point
Ratio	:	0.06235
AKT	AP1	Apoptosis	ATF2	ATM	BCL2	CREB	DNA_damage	DUSP1	EGFR	EGFR_stimulus	ELK1	ERK	FGFR3	FGFR3_stimulus	FOS	FOXO3	FRS2	GAB1	GADD45	GRB2	Growth_Arrest	JNK	JUN	MAP3K1_3	MAX	MDM2	MEK1_2	MSK	MTK1	MYC	p14	p21	p38	p53	p70	PDK1	PI3K	PKC	PLCG	PPP2CA	Proliferation	PTEN	RAF	RAS	RSK	SMAD	SOS	SPRY	TAK1
0	1	1	1	1	0	1	1	1	1	1	1	0	0	1	0	1	0	1	1	1	1	1	1	1	1	1	0	1	1	1	0	1	1	1	0	1	1	1	1	1	0	1	1	1	0	0	1	0	0
Attractor	6
Type	:	point
Ratio	:	0.062
AKT	AP1	Apoptosis	ATF2	ATM	BCL2	CREB	DNA_damage	DUSP1	EGFR	EGFR_stimulus	ELK1	ERK	FGFR3	FGFR3_stimulus	FOS	FOXO3	FRS2	GAB1	GADD45	GRB2	Growth_Arrest	JNK	JUN	MAP3K1_3	MAX	MDM2	MEK1_2	MSK	MTK1	MYC	p14	p21	p38	p53	p70	PDK1	PI3K	PKC	PLCG	PPP2CA	Proliferation	PTEN	RAF	RAS	RSK	SMAD	SOS	SPRY	TAK1
0	1	1	1	1	0	1	1	1	1	0	1	0	0	1	0	1	0	1	1	1	1	1	1	1	1	1	0	1	1	1	0	1	1	1	0	1	1	1	1	1	0	1	1	1	0	1	1	0	1
Attractor	7
Type	:	cyclic
Ratio	:	0.02588
AKT	AP1	Apoptosis	ATF2	ATM	BCL2	CREB	DNA_damage	DUSP1	EGFR	EGFR_stimulus	ELK1	ERK	FGFR3	FGFR3_stimulus	FOS	FOXO3	FRS2	GAB1	GADD45	GRB2	Growth_Arrest	JNK	JUN	MAP3K1_3	MAX	MDM2	MEK1_2	MSK	MTK1	MYC	p14	p21	p38	p53	p70	PDK1	PI3K	PKC	PLCG	PPP2CA	Proliferation	PTEN	RAF	RAS	RSK	SMAD	SOS	SPRY	TAK1
0	0	0	0	0	0	0	0	1	1	1	0	0	0	1	0	0	0	1	0	1	0	1	0	1	0	0	0	0	1	0	0	0	1	0	0	1	1	1	1	0	0	0	1	1	0	0	1	0	0
1	0	0	1	0	0	0	0	0	1	1	1	0	0	1	0	1	0	1	0	1	0	1	1	1	1	0	1	1	0	0	0	0	1	1	0	1	1	1	1	1	0	0	1	1	0	0	1	0	0
1	1	1	1	0	0	1	0	0	1	1	1	1	0	1	0	0	0	1	1	1	0	1	1	1	1	1	0	1	0	1	0	0	1	1	0	1	1	1	1	1	0	1	0	1	0	0	1	0	0
0	1	0	1	0	1	1	0	1	1	1	1	0	0	1	0	0	0	1	1	1	0	1	1	1	1	1	0	1	1	1	0	0	1	0	1	1	1	1	1	1	0	1	0	1	1	0	1	1	0
0	1	0	1	0	0	1	0	1	1	1	1	0	0	1	0	1	0	1	0	1	0	1	1	1	1	0	0	1	1	1	0	0	1	0	0	1	1	1	1	1	1	0	1	1	0	0	0	0	0
1	1	0	1	0	0	1	0	1	1	1	1	0	0	1	0	1	0	1	0	1	0	1	1	1	1	0	0	1	0	1	0	0	1	1	0	1	1	1	1	1	0	0	1	1	0	0	1	0	0
1	1	1	1	0	1	1	0	1	1	1	1	0	0	1	0	0	0	1	1	1	0	0	1	1	1	1	0	1	0	1	0	0	0	1	0	1	1	1	1	1	0	1	0	1	0	0	1	0	0
0	1	0	0	0	1	1	0	1	1	1	0	0	0	1	0	0	0	1	1	1	0	0	0	1	0	1	0	0	1	1	0	0	0	0	0	1	1	1	1	0	0	1	0	1	0	0	1	0	0
Attractor	8
Type	:	point
Ratio	:	0.0615
AKT	AP1	Apoptosis	ATF2	ATM	BCL2	CREB	DNA_damage	DUSP1	EGFR	EGFR_stimulus	ELK1	ERK	FGFR3	FGFR3_stimulus	FOS	FOXO3	FRS2	GAB1	GADD45	GRB2	Growth_Arrest	JNK	JUN	MAP3K1_3	MAX	MDM2	MEK1_2	MSK	MTK1	MYC	p14	p21	p38	p53	p70	PDK1	PI3K	PKC	PLCG	PPP2CA	Proliferation	PTEN	RAF	RAS	RSK	SMAD	SOS	SPRY	TAK1
0	1	1	1	1	0	1	1	1	1	1	1	0	0	1	0	1	0	1	1	1	1	1	1	1	1	1	0	1	1	1	0	1	1	1	0	1	1	1	1	1	0	1	1	1	0	1	1	0	1
Attractor	9
Type	:	point
Ratio	:	0.06117
AKT	AP1	Apoptosis	ATF2	ATM	BCL2	CREB	DNA_damage	DUSP1	EGFR	EGFR_stimulus	ELK1	ERK	FGFR3	FGFR3_stimulus	FOS	FOXO3	FRS2	GAB1	GADD45	GRB2	Growth_Arrest	JNK	JUN	MAP3K1_3	MAX	MDM2	MEK1_2	MSK	MTK1	MYC	p14	p21	p38	p53	p70	PDK1	PI3K	PKC	PLCG	PPP2CA	Proliferation	PTEN	RAF	RAS	RSK	SMAD	SOS	SPRY	TAK1
0	1	1	1	1	0	1	1	1	1	1	1	0	0	0	0	1	0	1	1	1	1	1	1	1	1	1	0	1	1	1	0	1	1	1	0	1	1	1	1	1	0	1	1	1	0	1	1	0	1
Attractor	10
Type	:	cyclic
Ratio	:	0.04778
AKT	AP1	Apoptosis	ATF2	ATM	BCL2	CREB	DNA_damage	DUSP1	EGFR	EGFR_stimulus	ELK1	ERK	FGFR3	FGFR3_stimulus	FOS	FOXO3	FRS2	GAB1	GADD45	GRB2	Growth_Arrest	JNK	JUN	MAP3K1_3	MAX	MDM2	MEK1_2	MSK	MTK1	MYC	p14	p21	p38	p53	p70	PDK1	PI3K	PKC	PLCG	PPP2CA	Proliferation	PTEN	RAF	RAS	RSK	SMAD	SOS	SPRY	TAK1
0	1	0	1	0	0	1	0	1	1	1	1	0	0	1	0	1	0	1	1	1	0	1	1	1	1	0	0	1	1	1	0	0	1	0	0	1	1	1	1	1	0	0	1	1	0	1	1	0	1
1	1	0	1	0	0	1	0	1	1	1	1	0	0	1	0	1	0	1	1	1	0	1	1	1	1	0	0	1	1	1	0	0	1	1	0	1	1	1	1	1	0	0	1	1	0	1	1	0	1
1	1	1	1	0	1	1	0	1	1	1	1	0	0	1	0	0	0	1	1	1	0	1	1	1	1	1	0	1	1	1	0	0	1	1	0	1	1	1	1	1	0	1	0	1	0	1	1	0	1
0	1	0	1	0	1	1	0	1	1	1	1	0	0	1	0	0	0	1	1	1	0	1	1	1	1	1	0	1	1	1	0	0	1	0	0	1	1	1	1	1	0	1	0	1	0	1	1	0	1
Attractor	11
Type	:	point
Ratio	:	0.06359
AKT	AP1	Apoptosis	ATF2	ATM	BCL2	CREB	DNA_damage	DUSP1	EGFR	EGFR_stimulus	ELK1	ERK	FGFR3	FGFR3_stimulus	FOS	FOXO3	FRS2	GAB1	GADD45	GRB2	Growth_Arrest	JNK	JUN	MAP3K1_3	MAX	MDM2	MEK1_2	MSK	MTK1	MYC	p14	p21	p38	p53	p70	PDK1	PI3K	PKC	PLCG	PPP2CA	Proliferation	PTEN	RAF	RAS	RSK	SMAD	SOS	SPRY	TAK1
0	1	1	1	1	0	1	1	1	1	1	1	0	0	0	0	1	0	1	1	1	1	1	1	1	1	1	0	1	1	1	0	1	1	1	0	1	1	1	1	1	0	1	1	1	0	0	1	0	0
Attractor	12
Type	:	cyclic
Ratio	:	0.01354
AKT	AP1	Apoptosis	ATF2	ATM	BCL2	CREB	DNA_damage	DUSP1	EGFR	EGFR_stimulus	ELK1	ERK	FGFR3	FGFR3_stimulus	FOS	FOXO3	FRS2	GAB1	GADD45	GRB2	Growth_Arrest	JNK	JUN	MAP3K1_3	MAX	MDM2	MEK1_2	MSK	MTK1	MYC	p14	p21	p38	p53	p70	PDK1	PI3K	PKC	PLCG	PPP2CA	Proliferation	PTEN	RAF	RAS	RSK	SMAD	SOS	SPRY	TAK1
0	0	0	1	0	0	0	0	1	1	1	1	0	0	1	0	1	0	1	0	1	0	1	1	1	1	0	0	1	1	0	0	0	1	0	0	1	1	1	1	1	0	0	1	1	0	0	1	0	0
1	1	0	1	0	0	1	0	0	1	1	1	0	0	1	0	1	0	1	0	1	0	1	1	1	1	0	0	1	0	1	0	0	1	1	0	1	1	1	1	1	0	0	1	1	0	0	1	0	0
1	1	1	1	0	1	1	0	1	1	1	1	0	0	1	0	0	0	1	1	1	0	1	1	1	1	1	0	1	0	1	0	0	1	1	0	1	1	1	1	1	0	1	0	1	0	0	1	0	0
0	1	0	1	0	1	1	0	1	1	1	1	0	0	1	0	0	0	1	1	1	0	0	1	1	1	1	0	1	1	1	0	0	0	0	0	1	1	1	1	1	0	1	0	1	0	0	1	0	0
0	1	0	0	0	0	1	0	1	1	1	0	0	0	1	0	0	0	1	0	1	0	1	0	1	0	0	0	0	1	1	0	0	1	0	0	1	1	1	1	0	0	0	1	1	0	0	1	0	0
1	0	0	1	0	0	0	0	1	1	1	1	0	0	1	0	1	0	1	0	1	0	1	1	1	1	0	0	1	0	0	0	0	1	1	0	1	1	1	1	1	0	0	1	1	0	0	1	0	0
1	1	1	1	0	0	1	0	0	1	1	1	0	0	1	0	0	0	1	1	1	0	0	1	1	1	1	0	1	0	1	0	0	0	1	0	1	1	1	1	1	0	1	0	1	0	0	1	0	0
0	1	0	0	0	1	1	0	1	1	1	0	0	0	1	0	0	0	1	1	1	0	1	0	1	0	1	0	0	1	1	0	0	1	0	0	1	1	1	1	0	0	1	0	1	0	0	1	0	0
Attractor	13
Type	:	cyclic
Ratio	:	0.00684
AKT	AP1	Apoptosis	ATF2	ATM	BCL2	CREB	DNA_damage	DUSP1	EGFR	EGFR_stimulus	ELK1	ERK	FGFR3	FGFR3_stimulus	FOS	FOXO3	FRS2	GAB1	GADD45	GRB2	Growth_Arrest	JNK	JUN	MAP3K1_3	MAX	MDM2	MEK1_2	MSK	MTK1	MYC	p14	p21	p38	p53	p70	PDK1	PI3K	PKC	PLCG	PPP2CA	Proliferation	PTEN	RAF	RAS	RSK	SMAD	SOS	SPRY	TAK1
0	0	0	0	0	1	0	0	1	1	0	0	0	0	1	0	0	0	1	0	1	0	1	0	1	0	1	0	0	1	0	0	0	1	0	0	1	1	1	1	0	0	0	0	1	0	0	1	0	0
1	0	0	1	0	0	0	0	0	1	0	1	0	0	1	0	1	0	1	0	1	0	1	1	1	1	0	1	1	0	0	0	0	1	0	0	1	1	1	1	1	0	0	1	1	0	0	1	0	0
1	1	0	1	0	0	1	0	0	1	0	1	1	0	1	0	0	0	1	0	1	0	1	1	1	1	1	0	1	0	1	0	0	1	1	0	1	1	1	1	1	0	0	0	1	0	0	1	0	0
1	1	0	1	0	1	1	0	1	1	0	1	0	0	1	0	0	0	1	1	1	0	1	1	1	1	1	0	1	0	1	0	0	1	0	1	1	1	1	1	1	0	1	0	1	1	0	1	1	0
0	1	0	1	0	1	1	0	1	1	0	1	0	0	1	0	0	0	1	0	1	0	0	1	1	1	1	0	1	1	1	0	0	0	0	0	1	1	1	1	1	1	0	0	1	0	0	0	0	0
1	1	0	0	0	0	1	0	1	1	0	0	0	0	1	0	0	0	1	0	1	0	1	0	1	0	0	0	0	0	1	0	0	1	0	0	1	1	1	1	0	0	0	1	1	0	0	1	0	0
1	0	0	1	0	1	0	0	1	1	0	1	0	0	1	0	0	0	1	0	1	0	0	1	1	1	1	0	1	0	0	0	0	0	1	0	1	1	1	1	1	0	0	0	1	0	0	1	0	0
1	1	0	0	0	0	1	0	0	1	0	0	0	0	1	0	0	0	1	1	1	0	0	0	1	0	1	0	0	0	1	0	0	0	0	0	1	1	1	1	0	0	1	0	1	0	0	1	0	0
Attractor	14
Type	:	cyclic
Ratio	:	0.04988
AKT	AP1	Apoptosis	ATF2	ATM	BCL2	CREB	DNA_damage	DUSP1	EGFR	EGFR_stimulus	ELK1	ERK	FGFR3	FGFR3_stimulus	FOS	FOXO3	FRS2	GAB1	GADD45	GRB2	Growth_Arrest	JNK	JUN	MAP3K1_3	MAX	MDM2	MEK1_2	MSK	MTK1	MYC	p14	p21	p38	p53	p70	PDK1	PI3K	PKC	PLCG	PPP2CA	Proliferation	PTEN	RAF	RAS	RSK	SMAD	SOS	SPRY	TAK1
0	1	0	1	0	0	1	0	1	1	1	1	0	0	0	0	1	0	1	1	1	0	1	1	1	1	0	0	1	1	1	0	0	1	0	0	1	1	1	1	1	0	0	1	1	0	1	1	0	1
1	1	0	1	0	0	1	0	1	1	1	1	0	0	0	0	1	0	1	1	1	0	1	1	1	1	0	0	1	1	1	0	0	1	1	0	1	1	1	1	1	0	0	1	1	0	1	1	0	1
1	1	1	1	0	1	1	0	1	1	1	1	0	0	0	0	0	0	1	1	1	0	1	1	1	1	1	0	1	1	1	0	0	1	1	0	1	1	1	1	1	0	1	0	1	0	1	1	0	1
0	1	0	1	0	1	1	0	1	1	1	1	0	0	0	0	0	0	1	1	1	0	1	1	1	1	1	0	1	1	1	0	0	1	0	0	1	1	1	1	1	0	1	0	1	0	1	1	0	1
Attractor	15
Type	:	point
Ratio	:	0.00081
AKT	AP1	Apoptosis	ATF2	ATM	BCL2	CREB	DNA_damage	DUSP1	EGFR	EGFR_stimulus	ELK1	ERK	FGFR3	FGFR3_stimulus	FOS	FOXO3	FRS2	GAB1	GADD45	GRB2	Growth_Arrest	JNK	JUN	MAP3K1_3	MAX	MDM2	MEK1_2	MSK	MTK1	MYC	p14	p21	p38	p53	p70	PDK1	PI3K	PKC	PLCG	PPP2CA	Proliferation	PTEN	RAF	RAS	RSK	SMAD	SOS	SPRY	TAK1
1	1	0	1	0	1	1	0	1	1	1	1	0	0	0	0	0	0	1	1	1	0	1	1	1	1	1	0	1	1	1	0	0	1	0	0	1	1	1	1	1	0	0	0	1	0	1	1	0	1
Attractor	16
Type	:	point
Ratio	:	0.06285
AKT	AP1	Apoptosis	ATF2	ATM	BCL2	CREB	DNA_damage	DUSP1	EGFR	EGFR_stimulus	ELK1	ERK	FGFR3	FGFR3_stimulus	FOS	FOXO3	FRS2	GAB1	GADD45	GRB2	Growth_Arrest	JNK	JUN	MAP3K1_3	MAX	MDM2	MEK1_2	MSK	MTK1	MYC	p14	p21	p38	p53	p70	PDK1	PI3K	PKC	PLCG	PPP2CA	Proliferation	PTEN	RAF	RAS	RSK	SMAD	SOS	SPRY	TAK1
0	1	1	1	1	0	1	1	1	1	0	1	0	0	1	0	1	0	1	1	1	1	1	1	1	1	1	0	1	1	1	0	1	1	1	0	1	1	1	1	1	0	1	1	1	0	0	1	0	0
Attractor	17
Type	:	cyclic
Ratio	:	0.01382
AKT	AP1	Apoptosis	ATF2	ATM	BCL2	CREB	DNA_damage	DUSP1	EGFR	EGFR_stimulus	ELK1	ERK	FGFR3	FGFR3_stimulus	FOS	FOXO3	FRS2	GAB1	GADD45	GRB2	Growth_Arrest	JNK	JUN	MAP3K1_3	MAX	MDM2	MEK1_2	MSK	MTK1	MYC	p14	p21	p38	p53	p70	PDK1	PI3K	PKC	PLCG	PPP2CA	Proliferation	PTEN	RAF	RAS	RSK	SMAD	SOS	SPRY	TAK1
0	0	0	1	0	0	0	0	1	1	1	1	0	0	0	0	1	0	1	0	1	0	1	1	1	1	0	0	1	1	0	0	0	1	0	0	1	1	1	1	1	0	0	1	1	0	0	1	0	0
1	1	0	1	0	0	1	0	0	1	1	1	0	0	0	0	1	0	1	0	1	0	1	1	1	1	0	0	1	0	1	0	0	1	1	0	1	1	1	1	1	0	0	1	1	0	0	1	0	0
1	1	1	1	0	1	1	0	1	1	1	1	0	0	0	0	0	0	1	1	1	0	1	1	1	1	1	0	1	0	1	0	0	1	1	0	1	1	1	1	1	0	1	0	1	0	0	1	0	0
0	1	0	1	0	1	1	0	1	1	1	1	0	0	0	0	0	0	1	1	1	0	0	1	1	1	1	0	1	1	1	0	0	0	0	0	1	1	1	1	1	0	1	0	1	0	0	1	0	0
0	1	0	0	0	0	1	0	1	1	1	0	0	0	0	0	0	0	1	0	1	0	1	0	1	0	0	0	0	1	1	0	0	1	0	0	1	1	1	1	0	0	0	1	1	0	0	1	0	0
1	0	0	1	0	0	0	0	1	1	1	1	0	0	0	0	1	0	1	0	1	0	1	1	1	1	0	0	1	0	0	0	0	1	1	0	1	1	1	1	1	0	0	1	1	0	0	1	0	0
1	1	1	1	0	0	1	0	0	1	1	1	0	0	0	0	0	0	1	1	1	0	0	1	1	1	1	0	1	0	1	0	0	0	1	0	1	1	1	1	1	0	1	0	1	0	0	1	0	0
0	1	0	0	0	1	1	0	1	1	1	0	0	0	0	0	0	0	1	1	1	0	1	0	1	0	1	0	0	1	1	0	0	1	0	0	1	1	1	1	0	0	1	0	1	0	0	1	0	0
Attractor	18
Type	:	cyclic
Ratio	:	0.00643
AKT	AP1	Apoptosis	ATF2	ATM	BCL2	CREB	DNA_damage	DUSP1	EGFR	EGFR_stimulus	ELK1	ERK	FGFR3	FGFR3_stimulus	FOS	FOXO3	FRS2	GAB1	GADD45	GRB2	Growth_Arrest	JNK	JUN	MAP3K1_3	MAX	MDM2	MEK1_2	MSK	MTK1	MYC	p14	p21	p38	p53	p70	PDK1	PI3K	PKC	PLCG	PPP2CA	Proliferation	PTEN	RAF	RAS	RSK	SMAD	SOS	SPRY	TAK1
0	0	0	0	0	1	0	0	1	1	1	0	0	0	1	0	0	0	1	0	1	0	0	0	1	0	1	0	0	1	0	0	0	0	0	0	1	1	1	1	0	0	0	0	1	0	0	1	0	0
1	0	0	0	0	0	0	0	0	1	1	0	0	0	1	0	0	0	1	0	1	0	1	0	1	0	0	1	0	0	0	0	0	1	0	0	1	1	1	1	0	0	0	1	1	0	0	1	0	0
1	0	0	1	0	0	0	0	0	1	1	1	1	0	1	0	0	0	1	0	1	0	1	1	1	1	1	1	1	0	0	0	0	1	1	0	1	1	1	1	1	0	0	0	1	0	0	1	0	0
1	1	0	1	0	0	1	0	0	1	1	1	1	0	1	0	0	0	1	1	1	0	1	1	1	1	1	0	1	0	1	0	0	1	0	1	1	1	1	1	1	0	1	0	1	1	0	1	1	0
0	1	0	1	0	1	1	0	1	1	1	1	0	0	1	1	0	0	1	0	1	0	1	1	1	1	1	0	1	1	1	0	0	1	0	1	1	1	1	1	1	1	0	0	1	1	0	0	1	0
1	1	0	1	0	0	1	0	1	1	1	1	0	0	1	0	1	0	1	0	1	0	1	1	1	1	0	0	1	0	1	0	0	1	0	0	1	1	1	1	1	1	0	1	1	0	0	0	0	0
1	1	0	1	0	1	1	0	1	1	1	1	0	0	1	0	0	0	1	0	1	0	0	1	1	1	1	0	1	0	1	0	0	0	1	0	1	1	1	1	1	0	0	0	1	0	0	1	0	0
1	1	0	0	0	1	1	0	1	1	1	0	0	0	1	0	0	0	1	1	1	0	0	0	1	0	1	0	0	0	1	0	0	0	0	0	1	1	1	1	0	0	1	0	1	0	0	1	0	0
Attractor	19
Type	:	cyclic
Ratio	:	0.01287
AKT	AP1	Apoptosis	ATF2	ATM	BCL2	CREB	DNA_damage	DUSP1	EGFR	EGFR_stimulus	ELK1	ERK	FGFR3	FGFR3_stimulus	FOS	FOXO3	FRS2	GAB1	GADD45	GRB2	Growth_Arrest	JNK	JUN	MAP3K1_3	MAX	MDM2	MEK1_2	MSK	MTK1	MYC	p14	p21	p38	p53	p70	PDK1	PI3K	PKC	PLCG	PPP2CA	Proliferation	PTEN	RAF	RAS	RSK	SMAD	SOS	SPRY	TAK1
0	1	0	1	0	1	1	0	1	1	1	1	0	0	0	0	0	0	1	1	1	0	1	1	1	1	1	0	1	1	1	0	0	1	0	0	1	1	1	1	1	0	0	0	1	0	1	1	0	1
1	1	0	1	0	0	1	0	1	1	1	1	0	0	0	0	1	0	1	1	1	0	1	1	1	1	0	0	1	1	1	0	0	1	0	0	1	1	1	1	1	0	0	1	1	0	1	1	0	1
1	1	0	1	0	1	1	0	1	1	1	1	0	0	0	0	0	0	1	1	1	0	1	1	1	1	1	0	1	1	1	0	0	1	1	0	1	1	1	1	1	0	0	0	1	0	1	1	0	1
1	1	0	1	0	1	1	0	1	1	1	1	0	0	0	0	0	0	1	1	1	0	1	1	1	1	1	0	1	1	1	0	0	1	0	0	1	1	1	1	1	0	1	0	1	0	1	1	0	1
Attractor	20
Type	:	cyclic
Ratio	:	0.01432
AKT	AP1	Apoptosis	ATF2	ATM	BCL2	CREB	DNA_damage	DUSP1	EGFR	EGFR_stimulus	ELK1	ERK	FGFR3	FGFR3_stimulus	FOS	FOXO3	FRS2	GAB1	GADD45	GRB2	Growth_Arrest	JNK	JUN	MAP3K1_3	MAX	MDM2	MEK1_2	MSK	MTK1	MYC	p14	p21	p38	p53	p70	PDK1	PI3K	PKC	PLCG	PPP2CA	Proliferation	PTEN	RAF	RAS	RSK	SMAD	SOS	SPRY	TAK1
0	0	0	1	0	0	0	0	1	1	0	1	0	0	1	0	1	0	1	0	1	0	1	1	1	1	0	0	1	1	0	0	0	1	0	0	1	1	1	1	1	0	0	1	1	0	0	1	0	0
1	1	0	1	0	0	1	0	0	1	0	1	0	0	1	0	1	0	1	0	1	0	1	1	1	1	0	0	1	0	1	0	0	1	1	0	1	1	1	1	1	0	0	1	1	0	0	1	0	0
1	1	1	1	0	1	1	0	1	1	0	1	0	0	1	0	0	0	1	1	1	0	1	1	1	1	1	0	1	0	1	0	0	1	1	0	1	1	1	1	1	0	1	0	1	0	0	1	0	0
0	1	0	1	0	1	1	0	1	1	0	1	0	0	1	0	0	0	1	1	1	0	0	1	1	1	1	0	1	1	1	0	0	0	0	0	1	1	1	1	1	0	1	0	1	0	0	1	0	0
0	1	0	0	0	0	1	0	1	1	0	0	0	0	1	0	0	0	1	0	1	0	1	0	1	0	0	0	0	1	1	0	0	1	0	0	1	1	1	1	0	0	0	1	1	0	0	1	0	0
1	0	0	1	0	0	0	0	1	1	0	1	0	0	1	0	1	0	1	0	1	0	1	1	1	1	0	0	1	0	0	0	0	1	1	0	1	1	1	1	1	0	0	1	1	0	0	1	0	0
1	1	1	1	0	0	1	0	0	1	0	1	0	0	1	0	0	0	1	1	1	0	0	1	1	1	1	0	1	0	1	0	0	0	1	0	1	1	1	1	1	0	1	0	1	0	0	1	0	0
0	1	0	0	0	1	1	0	1	1	0	0	0	0	1	0	0	0	1	1	1	0	1	0	1	0	1	0	0	1	1	0	0	1	0	0	1	1	1	1	0	0	1	0	1	0	0	1	0	0
Attractor	21
Type	:	cyclic
Ratio	:	0.01267
AKT	AP1	Apoptosis	ATF2	ATM	BCL2	CREB	DNA_damage	DUSP1	EGFR	EGFR_stimulus	ELK1	ERK	FGFR3	FGFR3_stimulus	FOS	FOXO3	FRS2	GAB1	GADD45	GRB2	Growth_Arrest	JNK	JUN	MAP3K1_3	MAX	MDM2	MEK1_2	MSK	MTK1	MYC	p14	p21	p38	p53	p70	PDK1	PI3K	PKC	PLCG	PPP2CA	Proliferation	PTEN	RAF	RAS	RSK	SMAD	SOS	SPRY	TAK1
0	1	0	1	0	1	1	0	1	1	0	1	0	0	1	0	0	0	1	1	1	0	1	1	1	1	1	0	1	1	1	0	0	1	0	0	1	1	1	1	1	0	0	0	1	0	1	1	0	1
1	1	0	1	0	0	1	0	1	1	0	1	0	0	1	0	1	0	1	1	1	0	1	1	1	1	0	0	1	1	1	0	0	1	0	0	1	1	1	1	1	0	0	1	1	0	1	1	0	1
1	1	0	1	0	1	1	0	1	1	0	1	0	0	1	0	0	0	1	1	1	0	1	1	1	1	1	0	1	1	1	0	0	1	1	0	1	1	1	1	1	0	0	0	1	0	1	1	0	1
1	1	0	1	0	1	1	0	1	1	0	1	0	0	1	0	0	0	1	1	1	0	1	1	1	1	1	0	1	1	1	0	0	1	0	0	1	1	1	1	1	0	1	0	1	0	1	1	0	1
Attractor	22
Type	:	cyclic
Ratio	:	0.00305
AKT	AP1	Apoptosis	ATF2	ATM	BCL2	CREB	DNA_damage	DUSP1	EGFR	EGFR_stimulus	ELK1	ERK	FGFR3	FGFR3_stimulus	FOS	FOXO3	FRS2	GAB1	GADD45	GRB2	Growth_Arrest	JNK	JUN	MAP3K1_3	MAX	MDM2	MEK1_2	MSK	MTK1	MYC	p14	p21	p38	p53	p70	PDK1	PI3K	PKC	PLCG	PPP2CA	Proliferation	PTEN	RAF	RAS	RSK	SMAD	SOS	SPRY	TAK1
0	0	0	1	0	1	0	0	1	1	0	1	0	0	0	0	0	0	1	0	1	0	1	1	1	1	1	0	1	1	0	0	0	1	0	1	1	1	1	1	1	0	0	0	1	1	0	1	1	0
1	1	0	1	0	0	1	0	0	1	0	1	0	0	0	0	1	0	1	0	1	0	1	1	1	1	0	0	1	0	1	0	0	1	0	0	1	1	1	1	1	0	0	1	1	0	0	0	0	0
1	1	0	1	0	1	1	0	1	1	0	1	0	0	0	0	0	0	1	0	1	0	1	1	1	1	1	0	1	0	1	0	0	1	1	0	1	1	1	1	1	0	0	0	1	0	0	1	0	0
1	1	0	1	0	1	1	0	1	1	0	1	0	0	0	0	0	0	1	1	1	0	0	1	1	1	1	0	1	0	1	0	0	0	0	0	1	1	1	1	1	0	1	0	1	0	0	1	0	0
0	1	0	0	0	1	1	0	1	1	0	0	0	0	0	0	0	0	1	0	1	0	0	0	1	0	1	0	0	1	1	0	0	0	0	0	1	1	1	1	0	0	0	0	1	0	0	1	0	0
1	0	0	0	0	0	0	0	1	1	0	0	0	0	0	0	0	0	1	0	1	0	1	0	1	0	0	0	0	0	0	0	0	1	0	0	1	1	1	1	0	0	0	1	1	0	0	1	0	0
1	0	0	1	0	0	0	0	0	1	0	1	0	0	0	0	0	0	1	0	1	0	0	1	1	1	1	1	1	0	0	0	0	0	1	0	1	1	1	1	1	0	0	0	1	0	0	1	0	0
1	1	0	0	0	0	1	0	0	1	0	0	1	0	0	0	0	0	1	1	1	0	1	0	1	0	1	0	0	0	1	0	0	1	0	0	1	1	1	1	0	0	1	0	1	0	0	1	0	0
Attractor	23
Type	:	cyclic
Ratio	:	0.00366
AKT	AP1	Apoptosis	ATF2	ATM	BCL2	CREB	DNA_damage	DUSP1	EGFR	EGFR_stimulus	ELK1	ERK	FGFR3	FGFR3_stimulus	FOS	FOXO3	FRS2	GAB1	GADD45	GRB2	Growth_Arrest	JNK	JUN	MAP3K1_3	MAX	MDM2	MEK1_2	MSK	MTK1	MYC	p14	p21	p38	p53	p70	PDK1	PI3K	PKC	PLCG	PPP2CA	Proliferation	PTEN	RAF	RAS	RSK	SMAD	SOS	SPRY	TAK1
0	0	0	1	0	1	0	0	1	1	1	1	0	0	0	0	0	0	1	0	1	0	0	1	1	1	1	0	1	1	0	0	0	0	0	0	1	1	1	1	1	0	0	0	1	0	0	1	0	0
1	1	0	0	0	0	1	0	0	1	1	0	0	0	0	0	0	0	1	0	1	0	1	0	1	0	0	0	0	0	1	0	0	1	0	0	1	1	1	1	0	0	0	1	1	0	0	1	0	0
1	0	0	1	0	1	0	0	1	1	1	1	0	0	0	0	0	0	1	0	1	0	1	1	1	1	1	0	1	0	0	0	0	1	1	0	1	1	1	1	1	0	0	0	1	0	0	1	0	0
1	1	0	1	0	0	1	0	0	1	1	1	0	0	0	0	0	0	1	1	1	0	0	1	1	1	1	0	1	0	1	0	0	0	0	0	1	1	1	1	1	0	1	0	1	0	0	1	0	0
0	1	0	0	0	1	1	0	1	1	1	0	0	0	0	0	0	0	1	0	1	0	1	0	1	0	1	0	0	1	1	0	0	1	0	0	1	1	1	1	0	0	0	0	1	0	0	1	0	0
1	0	0	1	0	0	0	0	1	1	1	1	0	0	0	0	1	0	1	0	1	0	1	1	1	1	0	0	1	0	0	0	0	1	0	0	1	1	1	1	1	0	0	1	1	0	0	1	0	0
1	1	0	1	0	0	1	0	0	1	1	1	0	0	0	0	0	0	1	0	1	0	0	1	1	1	1	0	1	0	1	0	0	0	1	0	1	1	1	1	1	0	0	0	1	0	0	1	0	0
1	1	0	0	0	1	1	0	1	1	1	0	0	0	0	0	0	0	1	1	1	0	1	0	1	0	1	0	0	0	1	0	0	1	0	0	1	1	1	1	0	0	1	0	1	0	0	1	0	0
Attractor	24
Type	:	cyclic
Ratio	:	0.00186
AKT	AP1	Apoptosis	ATF2	ATM	BCL2	CREB	DNA_damage	DUSP1	EGFR	EGFR_stimulus	ELK1	ERK	FGFR3	FGFR3_stimulus	FOS	FOXO3	FRS2	GAB1	GADD45	GRB2	Growth_Arrest	JNK	JUN	MAP3K1_3	MAX	MDM2	MEK1_2	MSK	MTK1	MYC	p14	p21	p38	p53	p70	PDK1	PI3K	PKC	PLCG	PPP2CA	Proliferation	PTEN	RAF	RAS	RSK	SMAD	SOS	SPRY	TAK1
1	0	0	0	0	0	0	0	0	1	1	0	0	0	0	0	0	0	1	0	1	0	0	0	1	0	1	1	0	0	0	0	0	0	0	0	1	1	1	1	0	0	0	0	1	0	0	1	0	0
1	0	0	0	0	0	0	0	0	1	1	0	1	0	0	0	0	0	1	0	1	0	1	0	1	0	1	1	0	0	0	0	0	1	0	0	1	1	1	1	0	0	0	0	1	0	0	1	0	0
1	0	0	1	0	0	0	0	0	1	1	1	1	0	0	0	0	0	1	0	1	0	1	1	1	1	1	1	1	0	0	0	0	1	0	1	1	1	1	1	1	0	0	0	1	1	0	1	1	0
1	1	0	1	0	0	1	0	0	1	1	1	1	0	0	1	0	0	1	0	1	0	1	1	1	1	1	0	1	0	1	0	0	1	0	1	1	1	1	1	1	0	0	0	1	1	0	0	1	0
1	1	0	1	0	1	1	0	1	1	1	1	0	0	0	1	0	0	1	0	1	0	1	1	1	1	1	0	1	0	1	0	0	1	0	1	1	1	1	1	1	1	0	0	1	1	0	0	1	0
1	1	0	1	0	1	1	0	1	1	1	1	0	0	0	0	0	0	1	0	1	0	0	1	1	1	1	0	1	0	1	0	0	0	0	0	1	1	1	1	1	1	0	0	1	0	0	0	0	0
1	1	0	0	0	1	1	0	1	1	1	0	0	0	0	0	0	0	1	0	1	0	0	0	1	0	1	0	0	0	1	0	0	0	0	0	1	1	1	1	0	0	0	0	1	0	0	1	0	0
1	0	0	0	0	1	0	0	1	1	1	0	0	0	0	0	0	0	1	0	1	0	0	0	1	0	1	0	0	0	0	0	0	0	0	0	1	1	1	1	0	0	0	0	1	0	0	1	0	0
Attractor	25
Type	:	cyclic
Ratio	:	0.01313
AKT	AP1	Apoptosis	ATF2	ATM	BCL2	CREB	DNA_damage	DUSP1	EGFR	EGFR_stimulus	ELK1	ERK	FGFR3	FGFR3_stimulus	FOS	FOXO3	FRS2	GAB1	GADD45	GRB2	Growth_Arrest	JNK	JUN	MAP3K1_3	MAX	MDM2	MEK1_2	MSK	MTK1	MYC	p14	p21	p38	p53	p70	PDK1	PI3K	PKC	PLCG	PPP2CA	Proliferation	PTEN	RAF	RAS	RSK	SMAD	SOS	SPRY	TAK1
0	1	0	1	0	1	1	0	1	1	0	1	0	0	0	0	0	0	1	1	1	0	1	1	1	1	1	0	1	1	1	0	0	1	0	0	1	1	1	1	1	0	0	0	1	0	1	1	0	1
1	1	0	1	0	0	1	0	1	1	0	1	0	0	0	0	1	0	1	1	1	0	1	1	1	1	0	0	1	1	1	0	0	1	0	0	1	1	1	1	1	0	0	1	1	0	1	1	0	1
1	1	0	1	0	1	1	0	1	1	0	1	0	0	0	0	0	0	1	1	1	0	1	1	1	1	1	0	1	1	1	0	0	1	1	0	1	1	1	1	1	0	0	0	1	0	1	1	0	1
1	1	0	1	0	1	1	0	1	1	0	1	0	0	0	0	0	0	1	1	1	0	1	1	1	1	1	0	1	1	1	0	0	1	0	0	1	1	1	1	1	0	1	0	1	0	1	1	0	1
Attractor	26
Type	:	cyclic
Ratio	:	0.00715
AKT	AP1	Apoptosis	ATF2	ATM	BCL2	CREB	DNA_damage	DUSP1	EGFR	EGFR_stimulus	ELK1	ERK	FGFR3	FGFR3_stimulus	FOS	FOXO3	FRS2	GAB1	GADD45	GRB2	Growth_Arrest	JNK	JUN	MAP3K1_3	MAX	MDM2	MEK1_2	MSK	MTK1	MYC	p14	p21	p38	p53	p70	PDK1	PI3K	PKC	PLCG	PPP2CA	Proliferation	PTEN	RAF	RAS	RSK	SMAD	SOS	SPRY	TAK1
0	0	0	0	0	1	0	0	1	1	0	0	0	0	0	0	0	0	1	0	1	0	1	0	1	0	1	0	0	1	0	0	0	1	0	0	1	1	1	1	0	0	0	0	1	0	0	1	0	0
1	0	0	1	0	0	0	0	0	1	0	1	0	0	0	0	1	0	1	0	1	0	1	1	1	1	0	1	1	0	0	0	0	1	0	0	1	1	1	1	1	0	0	1	1	0	0	1	0	0
1	1	0	1	0	0	1	0	0	1	0	1	1	0	0	0	0	0	1	0	1	0	1	1	1	1	1	0	1	0	1	0	0	1	1	0	1	1	1	1	1	0	0	0	1	0	0	1	0	0
1	1	0	1	0	1	1	0	1	1	0	1	0	0	0	0	0	0	1	1	1	0	1	1	1	1	1	0	1	0	1	0	0	1	0	1	1	1	1	1	1	0	1	0	1	1	0	1	1	0
0	1	0	1	0	1	1	0	1	1	0	1	0	0	0	0	0	0	1	0	1	0	0	1	1	1	1	0	1	1	1	0	0	0	0	0	1	1	1	1	1	1	0	0	1	0	0	0	0	0
1	1	0	0	0	0	1	0	1	1	0	0	0	0	0	0	0	0	1	0	1	0	1	0	1	0	0	0	0	0	1	0	0	1	0	0	1	1	1	1	0	0	0	1	1	0	0	1	0	0
1	0	0	1	0	1	0	0	1	1	0	1	0	0	0	0	0	0	1	0	1	0	0	1	1	1	1	0	1	0	0	0	0	0	1	0	1	1	1	1	1	0	0	0	1	0	0	1	0	0
1	1	0	0	0	0	1	0	0	1	0	0	0	0	0	0	0	0	1	1	1	0	0	0	1	0	1	0	0	0	1	0	0	0	0	0	1	1	1	1	0	0	1	0	1	0	0	1	0	0
Attractor	27
Type	:	cyclic
Ratio	:	0.02596
AKT	AP1	Apoptosis	ATF2	ATM	BCL2	CREB	DNA_damage	DUSP1	EGFR	EGFR_stimulus	ELK1	ERK	FGFR3	FGFR3_stimulus	FOS	FOXO3	FRS2	GAB1	GADD45	GRB2	Growth_Arrest	JNK	JUN	MAP3K1_3	MAX	MDM2	MEK1_2	MSK	MTK1	MYC	p14	p21	p38	p53	p70	PDK1	PI3K	PKC	PLCG	PPP2CA	Proliferation	PTEN	RAF	RAS	RSK	SMAD	SOS	SPRY	TAK1
0	0	0	0	0	0	0	0	1	1	0	0	0	0	0	0	0	0	1	0	1	0	1	0	1	0	0	0	0	1	0	0	0	1	0	0	1	1	1	1	0	0	0	1	1	0	0	1	0	0
1	0	0	1	0	0	0	0	0	1	0	1	0	0	0	0	1	0	1	0	1	0	1	1	1	1	0	1	1	0	0	0	0	1	1	0	1	1	1	1	1	0	0	1	1	0	0	1	0	0
1	1	1	1	0	0	1	0	0	1	0	1	1	0	0	0	0	0	1	1	1	0	1	1	1	1	1	0	1	0	1	0	0	1	1	0	1	1	1	1	1	0	1	0	1	0	0	1	0	0
0	1	0	1	0	1	1	0	1	1	0	1	0	0	0	0	0	0	1	1	1	0	1	1	1	1	1	0	1	1	1	0	0	1	0	1	1	1	1	1	1	0	1	0	1	1	0	1	1	0
0	1	0	1	0	0	1	0	1	1	0	1	0	0	0	0	1	0	1	0	1	0	1	1	1	1	0	0	1	1	1	0	0	1	0	0	1	1	1	1	1	1	0	1	1	0	0	0	0	0
1	1	0	1	0	0	1	0	1	1	0	1	0	0	0	0	1	0	1	0	1	0	1	1	1	1	0	0	1	0	1	0	0	1	1	0	1	1	1	1	1	0	0	1	1	0	0	1	0	0
1	1	1	1	0	1	1	0	1	1	0	1	0	0	0	0	0	0	1	1	1	0	0	1	1	1	1	0	1	0	1	0	0	0	1	0	1	1	1	1	1	0	1	0	1	0	0	1	0	0
0	1	0	0	0	1	1	0	1	1	0	0	0	0	0	0	0	0	1	1	1	0	0	0	1	0	1	0	0	1	1	0	0	0	0	0	1	1	1	1	0	0	1	0	1	0	0	1	0	0
Attractor	28
Type	:	cyclic
Ratio	:	0.01279
AKT	AP1	Apoptosis	ATF2	ATM	BCL2	CREB	DNA_damage	DUSP1	EGFR	EGFR_stimulus	ELK1	ERK	FGFR3	FGFR3_stimulus	FOS	FOXO3	FRS2	GAB1	GADD45	GRB2	Growth_Arrest	JNK	JUN	MAP3K1_3	MAX	MDM2	MEK1_2	MSK	MTK1	MYC	p14	p21	p38	p53	p70	PDK1	PI3K	PKC	PLCG	PPP2CA	Proliferation	PTEN	RAF	RAS	RSK	SMAD	SOS	SPRY	TAK1
0	1	0	1	0	1	1	0	1	1	1	1	0	0	1	0	0	0	1	1	1	0	1	1	1	1	1	0	1	1	1	0	0	1	0	0	1	1	1	1	1	0	0	0	1	0	1	1	0	1
1	1	0	1	0	0	1	0	1	1	1	1	0	0	1	0	1	0	1	1	1	0	1	1	1	1	0	0	1	1	1	0	0	1	0	0	1	1	1	1	1	0	0	1	1	0	1	1	0	1
1	1	0	1	0	1	1	0	1	1	1	1	0	0	1	0	0	0	1	1	1	0	1	1	1	1	1	0	1	1	1	0	0	1	1	0	1	1	1	1	1	0	0	0	1	0	1	1	0	1
1	1	0	1	0	1	1	0	1	1	1	1	0	0	1	0	0	0	1	1	1	0	1	1	1	1	1	0	1	1	1	0	0	1	0	0	1	1	1	1	1	0	1	0	1	0	1	1	0	1
Attractor	29
Type	:	cyclic
Ratio	:	0.04954
AKT	AP1	Apoptosis	ATF2	ATM	BCL2	CREB	DNA_damage	DUSP1	EGFR	EGFR_stimulus	ELK1	ERK	FGFR3	FGFR3_stimulus	FOS	FOXO3	FRS2	GAB1	GADD45	GRB2	Growth_Arrest	JNK	JUN	MAP3K1_3	MAX	MDM2	MEK1_2	MSK	MTK1	MYC	p14	p21	p38	p53	p70	PDK1	PI3K	PKC	PLCG	PPP2CA	Proliferation	PTEN	RAF	RAS	RSK	SMAD	SOS	SPRY	TAK1
0	1	0	1	0	0	1	0	1	1	0	1	0	0	0	0	1	0	1	1	1	0	1	1	1	1	0	0	1	1	1	0	0	1	0	0	1	1	1	1	1	0	0	1	1	0	1	1	0	1
1	1	0	1	0	0	1	0	1	1	0	1	0	0	0	0	1	0	1	1	1	0	1	1	1	1	0	0	1	1	1	0	0	1	1	0	1	1	1	1	1	0	0	1	1	0	1	1	0	1
1	1	1	1	0	1	1	0	1	1	0	1	0	0	0	0	0	0	1	1	1	0	1	1	1	1	1	0	1	1	1	0	0	1	1	0	1	1	1	1	1	0	1	0	1	0	1	1	0	1
0	1	0	1	0	1	1	0	1	1	0	1	0	0	0	0	0	0	1	1	1	0	1	1	1	1	1	0	1	1	1	0	0	1	0	0	1	1	1	1	1	0	1	0	1	0	1	1	0	1
Attractor	30
Type	:	cyclic
Ratio	:	0.00364
AKT	AP1	Apoptosis	ATF2	ATM	BCL2	CREB	DNA_damage	DUSP1	EGFR	EGFR_stimulus	ELK1	ERK	FGFR3	FGFR3_stimulus	FOS	FOXO3	FRS2	GAB1	GADD45	GRB2	Growth_Arrest	JNK	JUN	MAP3K1_3	MAX	MDM2	MEK1_2	MSK	MTK1	MYC	p14	p21	p38	p53	p70	PDK1	PI3K	PKC	PLCG	PPP2CA	Proliferation	PTEN	RAF	RAS	RSK	SMAD	SOS	SPRY	TAK1
0	0	0	1	0	1	0	0	1	1	1	1	0	0	1	0	0	0	1	0	1	0	0	1	1	1	1	0	1	1	0	0	0	0	0	0	1	1	1	1	1	0	0	0	1	0	0	1	0	0
1	1	0	0	0	0	1	0	0	1	1	0	0	0	1	0	0	0	1	0	1	0	1	0	1	0	0	0	0	0	1	0	0	1	0	0	1	1	1	1	0	0	0	1	1	0	0	1	0	0
1	0	0	1	0	1	0	0	1	1	1	1	0	0	1	0	0	0	1	0	1	0	1	1	1	1	1	0	1	0	0	0	0	1	1	0	1	1	1	1	1	0	0	0	1	0	0	1	0	0
1	1	0	1	0	0	1	0	0	1	1	1	0	0	1	0	0	0	1	1	1	0	0	1	1	1	1	0	1	0	1	0	0	0	0	0	1	1	1	1	1	0	1	0	1	0	0	1	0	0
0	1	0	0	0	1	1	0	1	1	1	0	0	0	1	0	0	0	1	0	1	0	1	0	1	0	1	0	0	1	1	0	0	1	0	0	1	1	1	1	0	0	0	0	1	0	0	1	0	0
1	0	0	1	0	0	0	0	1	1	1	1	0	0	1	0	1	0	1	0	1	0	1	1	1	1	0	0	1	0	0	0	0	1	0	0	1	1	1	1	1	0	0	1	1	0	0	1	0	0
1	1	0	1	0	0	1	0	0	1	1	1	0	0	1	0	0	0	1	0	1	0	0	1	1	1	1	0	1	0	1	0	0	0	1	0	1	1	1	1	1	0	0	0	1	0	0	1	0	0
1	1	0	0	0	1	1	0	1	1	1	0	0	0	1	0	0	0	1	1	1	0	1	0	1	0	1	0	0	0	1	0	0	1	0	0	1	1	1	1	0	0	1	0	1	0	0	1	0	0
Attractor	31
Type	:	cyclic
Ratio	:	0.0071
AKT	AP1	Apoptosis	ATF2	ATM	BCL2	CREB	DNA_damage	DUSP1	EGFR	EGFR_stimulus	ELK1	ERK	FGFR3	FGFR3_stimulus	FOS	FOXO3	FRS2	GAB1	GADD45	GRB2	Growth_Arrest	JNK	JUN	MAP3K1_3	MAX	MDM2	MEK1_2	MSK	MTK1	MYC	p14	p21	p38	p53	p70	PDK1	PI3K	PKC	PLCG	PPP2CA	Proliferation	PTEN	RAF	RAS	RSK	SMAD	SOS	SPRY	TAK1
0	0	0	0	0	1	0	0	1	1	0	0	0	0	0	0	0	0	1	0	1	0	0	0	1	0	1	0	0	1	0	0	0	0	0	0	1	1	1	1	0	0	0	0	1	0	0	1	0	0
1	0	0	0	0	0	0	0	0	1	0	0	0	0	0	0	0	0	1	0	1	0	1	0	1	0	0	1	0	0	0	0	0	1	0	0	1	1	1	1	0	0	0	1	1	0	0	1	0	0
1	0	0	1	0	0	0	0	0	1	0	1	1	0	0	0	0	0	1	0	1	0	1	1	1	1	1	1	1	0	0	0	0	1	1	0	1	1	1	1	1	0	0	0	1	0	0	1	0	0
1	1	0	1	0	0	1	0	0	1	0	1	1	0	0	0	0	0	1	1	1	0	1	1	1	1	1	0	1	0	1	0	0	1	0	1	1	1	1	1	1	0	1	0	1	1	0	1	1	0
0	1	0	1	0	1	1	0	1	1	0	1	0	0	0	1	0	0	1	0	1	0	1	1	1	1	1	0	1	1	1	0	0	1	0	1	1	1	1	1	1	1	0	0	1	1	0	0	1	0
1	1	0	1	0	0	1	0	1	1	0	1	0	0	0	0	1	0	1	0	1	0	1	1	1	1	0	0	1	0	1	0	0	1	0	0	1	1	1	1	1	1	0	1	1	0	0	0	0	0
1	1	0	1	0	1	1	0	1	1	0	1	0	0	0	0	0	0	1	0	1	0	0	1	1	1	1	0	1	0	1	0	0	0	1	0	1	1	1	1	1	0	0	0	1	0	0	1	0	0
1	1	0	0	0	1	1	0	1	1	0	0	0	0	0	0	0	0	1	1	1	0	0	0	1	0	1	0	0	0	1	0	0	0	0	0	1	1	1	1	0	0	1	0	1	0	0	1	0	0
Attractor	32
Type	:	cyclic
Ratio	:	0.02531
AKT	AP1	Apoptosis	ATF2	ATM	BCL2	CREB	DNA_damage	DUSP1	EGFR	EGFR_stimulus	ELK1	ERK	FGFR3	FGFR3_stimulus	FOS	FOXO3	FRS2	GAB1	GADD45	GRB2	Growth_Arrest	JNK	JUN	MAP3K1_3	MAX	MDM2	MEK1_2	MSK	MTK1	MYC	p14	p21	p38	p53	p70	PDK1	PI3K	PKC	PLCG	PPP2CA	Proliferation	PTEN	RAF	RAS	RSK	SMAD	SOS	SPRY	TAK1
0	0	0	0	0	0	0	0	1	1	0	0	0	0	1	0	0	0	1	0	1	0	1	0	1	0	0	0	0	1	0	0	0	1	0	0	1	1	1	1	0	0	0	1	1	0	0	1	0	0
1	0	0	1	0	0	0	0	0	1	0	1	0	0	1	0	1	0	1	0	1	0	1	1	1	1	0	1	1	0	0	0	0	1	1	0	1	1	1	1	1	0	0	1	1	0	0	1	0	0
1	1	1	1	0	0	1	0	0	1	0	1	1	0	1	0	0	0	1	1	1	0	1	1	1	1	1	0	1	0	1	0	0	1	1	0	1	1	1	1	1	0	1	0	1	0	0	1	0	0
0	1	0	1	0	1	1	0	1	1	0	1	0	0	1	0	0	0	1	1	1	0	1	1	1	1	1	0	1	1	1	0	0	1	0	1	1	1	1	1	1	0	1	0	1	1	0	1	1	0
0	1	0	1	0	0	1	0	1	1	0	1	0	0	1	0	1	0	1	0	1	0	1	1	1	1	0	0	1	1	1	0	0	1	0	0	1	1	1	1	1	1	0	1	1	0	0	0	0	0
1	1	0	1	0	0	1	0	1	1	0	1	0	0	1	0	1	0	1	0	1	0	1	1	1	1	0	0	1	0	1	0	0	1	1	0	1	1	1	1	1	0	0	1	1	0	0	1	0	0
1	1	1	1	0	1	1	0	1	1	0	1	0	0	1	0	0	0	1	1	1	0	0	1	1	1	1	0	1	0	1	0	0	0	1	0	1	1	1	1	1	0	1	0	1	0	0	1	0	0
0	1	0	0	0	1	1	0	1	1	0	0	0	0	1	0	0	0	1	1	1	0	0	0	1	0	1	0	0	1	1	0	0	0	0	0	1	1	1	1	0	0	1	0	1	0	0	1	0	0
Attractor	33
Type	:	cyclic
Ratio	:	0.00691
AKT	AP1	Apoptosis	ATF2	ATM	BCL2	CREB	DNA_damage	DUSP1	EGFR	EGFR_stimulus	ELK1	ERK	FGFR3	FGFR3_stimulus	FOS	FOXO3	FRS2	GAB1	GADD45	GRB2	Growth_Arrest	JNK	JUN	MAP3K1_3	MAX	MDM2	MEK1_2	MSK	MTK1	MYC	p14	p21	p38	p53	p70	PDK1	PI3K	PKC	PLCG	PPP2CA	Proliferation	PTEN	RAF	RAS	RSK	SMAD	SOS	SPRY	TAK1
0	0	0	0	0	1	0	0	1	1	1	0	0	0	1	0	0	0	1	0	1	0	1	0	1	0	1	0	0	1	0	0	0	1	0	0	1	1	1	1	0	0	0	0	1	0	0	1	0	0
1	0	0	1	0	0	0	0	0	1	1	1	0	0	1	0	1	0	1	0	1	0	1	1	1	1	0	1	1	0	0	0	0	1	0	0	1	1	1	1	1	0	0	1	1	0	0	1	0	0
1	1	0	1	0	0	1	0	0	1	1	1	1	0	1	0	0	0	1	0	1	0	1	1	1	1	1	0	1	0	1	0	0	1	1	0	1	1	1	1	1	0	0	0	1	0	0	1	0	0
1	1	0	1	0	1	1	0	1	1	1	1	0	0	1	0	0	0	1	1	1	0	1	1	1	1	1	0	1	0	1	0	0	1	0	1	1	1	1	1	1	0	1	0	1	1	0	1	1	0
0	1	0	1	0	1	1	0	1	1	1	1	0	0	1	0	0	0	1	0	1	0	0	1	1	1	1	0	1	1	1	0	0	0	0	0	1	1	1	1	1	1	0	0	1	0	0	0	0	0
1	1	0	0	0	0	1	0	1	1	1	0	0	0	1	0	0	0	1	0	1	0	1	0	1	0	0	0	0	0	1	0	0	1	0	0	1	1	1	1	0	0	0	1	1	0	0	1	0	0
1	0	0	1	0	1	0	0	1	1	1	1	0	0	1	0	0	0	1	0	1	0	0	1	1	1	1	0	1	0	0	0	0	0	1	0	1	1	1	1	1	0	0	0	1	0	0	1	0	0
1	1	0	0	0	0	1	0	0	1	1	0	0	0	1	0	0	0	1	1	1	0	0	0	1	0	1	0	0	0	1	0	0	0	0	0	1	1	1	1	0	0	1	0	1	0	0	1	0	0
Attractor	34
Type	:	cyclic
Ratio	:	0.00072
AKT	AP1	Apoptosis	ATF2	ATM	BCL2	CREB	DNA_damage	DUSP1	EGFR	EGFR_stimulus	ELK1	ERK	FGFR3	FGFR3_stimulus	FOS	FOXO3	FRS2	GAB1	GADD45	GRB2	Growth_Arrest	JNK	JUN	MAP3K1_3	MAX	MDM2	MEK1_2	MSK	MTK1	MYC	p14	p21	p38	p53	p70	PDK1	PI3K	PKC	PLCG	PPP2CA	Proliferation	PTEN	RAF	RAS	RSK	SMAD	SOS	SPRY	TAK1
1	0	0	0	0	1	0	0	1	1	0	0	0	0	1	0	0	0	1	0	1	0	1	0	1	0	1	0	0	0	0	0	0	1	0	0	1	1	1	1	0	0	0	0	1	0	0	1	0	0
1	0	0	1	0	0	0	0	0	1	0	1	0	0	1	0	0	0	1	0	1	0	0	1	1	1	1	1	1	0	0	0	0	0	0	0	1	1	1	1	1	0	0	0	1	0	0	1	0	0
1	1	0	0	0	0	1	0	0	1	0	0	1	0	1	0	0	0	1	0	1	0	1	0	1	0	1	0	0	0	1	0	0	1	0	0	1	1	1	1	0	0	0	0	1	0	0	1	0	0
1	0	0	1	0	1	0	0	1	1	0	1	0	0	1	0	0	0	1	0	1	0	1	1	1	1	1	0	1	0	0	0	0	1	0	1	1	1	1	1	1	0	0	0	1	1	0	1	1	0
1	1	0	1	0	0	1	0	0	1	0	1	0	0	1	0	0	0	1	0	1	0	0	1	1	1	1	0	1	0	1	0	0	0	0	0	1	1	1	1	1	0	0	0	1	0	0	0	0	0
1	1	0	0	0	1	1	0	1	1	0	0	0	0	1	0	0	0	1	0	1	0	1	0	1	0	1	0	0	0	1	0	0	1	0	0	1	1	1	1	0	0	0	0	1	0	0	1	0	0
1	0	0	1	0	1	0	0	1	1	0	1	0	0	1	0	0	0	1	0	1	0	0	1	1	1	1	0	1	0	0	0	0	0	0	0	1	1	1	1	1	0	0	0	1	0	0	1	0	0
1	1	0	0	0	0	1	0	0	1	0	0	0	0	1	0	0	0	1	0	1	0	0	0	1	0	1	0	0	0	1	0	0	0	0	0	1	1	1	1	0	0	0	0	1	0	0	1	0	0
Attractor	35
Type	:	cyclic
Ratio	:	0.00169
AKT	AP1	Apoptosis	ATF2	ATM	BCL2	CREB	DNA_damage	DUSP1	EGFR	EGFR_stimulus	ELK1	ERK	FGFR3	FGFR3_stimulus	FOS	FOXO3	FRS2	GAB1	GADD45	GRB2	Growth_Arrest	JNK	JUN	MAP3K1_3	MAX	MDM2	MEK1_2	MSK	MTK1	MYC	p14	p21	p38	p53	p70	PDK1	PI3K	PKC	PLCG	PPP2CA	Proliferation	PTEN	RAF	RAS	RSK	SMAD	SOS	SPRY	TAK1
1	0	0	0	0	0	0	0	0	1	0	0	0	0	0	0	0	0	1	0	1	0	0	0	1	0	1	1	0	0	0	0	0	0	0	0	1	1	1	1	0	0	0	0	1	0	0	1	0	0
1	0	0	0	0	0	0	0	0	1	0	0	1	0	0	0	0	0	1	0	1	0	1	0	1	0	1	1	0	0	0	0	0	1	0	0	1	1	1	1	0	0	0	0	1	0	0	1	0	0
1	0	0	1	0	0	0	0	0	1	0	1	1	0	0	0	0	0	1	0	1	0	1	1	1	1	1	1	1	0	0	0	0	1	0	1	1	1	1	1	1	0	0	0	1	1	0	1	1	0
1	1	0	1	0	0	1	0	0	1	0	1	1	0	0	1	0	0	1	0	1	0	1	1	1	1	1	0	1	0	1	0	0	1	0	1	1	1	1	1	1	0	0	0	1	1	0	0	1	0
1	1	0	1	0	1	1	0	1	1	0	1	0	0	0	1	0	0	1	0	1	0	1	1	1	1	1	0	1	0	1	0	0	1	0	1	1	1	1	1	1	1	0	0	1	1	0	0	1	0
1	1	0	1	0	1	1	0	1	1	0	1	0	0	0	0	0	0	1	0	1	0	0	1	1	1	1	0	1	0	1	0	0	0	0	0	1	1	1	1	1	1	0	0	1	0	0	0	0	0
1	1	0	0	0	1	1	0	1	1	0	0	0	0	0	0	0	0	1	0	1	0	0	0	1	0	1	0	0	0	1	0	0	0	0	0	1	1	1	1	0	0	0	0	1	0	0	1	0	0
1	0	0	0	0	1	0	0	1	1	0	0	0	0	0	0	0	0	1	0	1	0	0	0	1	0	1	0	0	0	0	0	0	0	0	0	1	1	1	1	0	0	0	0	1	0	0	1	0	0
Attractor	36
Type	:	cyclic
Ratio	:	0.00343
AKT	AP1	Apoptosis	ATF2	ATM	BCL2	CREB	DNA_damage	DUSP1	EGFR	EGFR_stimulus	ELK1	ERK	FGFR3	FGFR3_stimulus	FOS	FOXO3	FRS2	GAB1	GADD45	GRB2	Growth_Arrest	JNK	JUN	MAP3K1_3	MAX	MDM2	MEK1_2	MSK	MTK1	MYC	p14	p21	p38	p53	p70	PDK1	PI3K	PKC	PLCG	PPP2CA	Proliferation	PTEN	RAF	RAS	RSK	SMAD	SOS	SPRY	TAK1
0	0	0	1	0	1	0	0	1	1	1	1	0	0	0	0	0	0	1	0	1	0	1	1	1	1	1	0	1	1	0	0	0	1	0	1	1	1	1	1	1	0	0	0	1	1	0	1	1	0
1	1	0	1	0	0	1	0	0	1	1	1	0	0	0	0	1	0	1	0	1	0	1	1	1	1	0	0	1	0	1	0	0	1	0	0	1	1	1	1	1	0	0	1	1	0	0	0	0	0
1	1	0	1	0	1	1	0	1	1	1	1	0	0	0	0	0	0	1	0	1	0	1	1	1	1	1	0	1	0	1	0	0	1	1	0	1	1	1	1	1	0	0	0	1	0	0	1	0	0
1	1	0	1	0	1	1	0	1	1	1	1	0	0	0	0	0	0	1	1	1	0	0	1	1	1	1	0	1	0	1	0	0	0	0	0	1	1	1	1	1	0	1	0	1	0	0	1	0	0
0	1	0	0	0	1	1	0	1	1	1	0	0	0	0	0	0	0	1	0	1	0	0	0	1	0	1	0	0	1	1	0	0	0	0	0	1	1	1	1	0	0	0	0	1	0	0	1	0	0
1	0	0	0	0	0	0	0	1	1	1	0	0	0	0	0	0	0	1	0	1	0	1	0	1	0	0	0	0	0	0	0	0	1	0	0	1	1	1	1	0	0	0	1	1	0	0	1	0	0
1	0	0	1	0	0	0	0	0	1	1	1	0	0	0	0	0	0	1	0	1	0	0	1	1	1	1	1	1	0	0	0	0	0	1	0	1	1	1	1	1	0	0	0	1	0	0	1	0	0
1	1	0	0	0	0	1	0	0	1	1	0	1	0	0	0	0	0	1	1	1	0	1	0	1	0	1	0	0	0	1	0	0	1	0	0	1	1	1	1	0	0	1	0	1	0	0	1	0	0
Attractor	37
Type	:	cyclic
Ratio	:	0.00631
AKT	AP1	Apoptosis	ATF2	ATM	BCL2	CREB	DNA_damage	DUSP1	EGFR	EGFR_stimulus	ELK1	ERK	FGFR3	FGFR3_stimulus	FOS	FOXO3	FRS2	GAB1	GADD45	GRB2	Growth_Arrest	JNK	JUN	MAP3K1_3	MAX	MDM2	MEK1_2	MSK	MTK1	MYC	p14	p21	p38	p53	p70	PDK1	PI3K	PKC	PLCG	PPP2CA	Proliferation	PTEN	RAF	RAS	RSK	SMAD	SOS	SPRY	TAK1
0	0	0	0	0	1	0	0	1	1	1	0	0	0	0	0	0	0	1	0	1	0	0	0	1	0	1	0	0	1	0	0	0	0	0	0	1	1	1	1	0	0	0	0	1	0	0	1	0	0
1	0	0	0	0	0	0	0	0	1	1	0	0	0	0	0	0	0	1	0	1	0	1	0	1	0	0	1	0	0	0	0	0	1	0	0	1	1	1	1	0	0	0	1	1	0	0	1	0	0
1	0	0	1	0	0	0	0	0	1	1	1	1	0	0	0	0	0	1	0	1	0	1	1	1	1	1	1	1	0	0	0	0	1	1	0	1	1	1	1	1	0	0	0	1	0	0	1	0	0
1	1	0	1	0	0	1	0	0	1	1	1	1	0	0	0	0	0	1	1	1	0	1	1	1	1	1	0	1	0	1	0	0	1	0	1	1	1	1	1	1	0	1	0	1	1	0	1	1	0
0	1	0	1	0	1	1	0	1	1	1	1	0	0	0	1	0	0	1	0	1	0	1	1	1	1	1	0	1	1	1	0	0	1	0	1	1	1	1	1	1	1	0	0	1	1	0	0	1	0
1	1	0	1	0	0	1	0	1	1	1	1	0	0	0	0	1	0	1	0	1	0	1	1	1	1	0	0	1	0	1	0	0	1	0	0	1	1	1	1	1	1	0	1	1	0	0	0	0	0
1	1	0	1	0	1	1	0	1	1	1	1	0	0	0	0	0	0	1	0	1	0	0	1	1	1	1	0	1	0	1	0	0	0	1	0	1	1	1	1	1	0	0	0	1	0	0	1	0	0
1	1	0	0	0	1	1	0	1	1	1	0	0	0	0	0	0	0	1	1	1	0	0	0	1	0	1	0	0	0	1	0	0	0	0	0	1	1	1	1	0	0	1	0	1	0	0	1	0	0
Attractor	38
Type	:	cyclic
Ratio	:	0.01369
AKT	AP1	Apoptosis	ATF2	ATM	BCL2	CREB	DNA_damage	DUSP1	EGFR	EGFR_stimulus	ELK1	ERK	FGFR3	FGFR3_stimulus	FOS	FOXO3	FRS2	GAB1	GADD45	GRB2	Growth_Arrest	JNK	JUN	MAP3K1_3	MAX	MDM2	MEK1_2	MSK	MTK1	MYC	p14	p21	p38	p53	p70	PDK1	PI3K	PKC	PLCG	PPP2CA	Proliferation	PTEN	RAF	RAS	RSK	SMAD	SOS	SPRY	TAK1
0	0	0	1	0	0	0	0	1	1	0	1	0	0	0	0	1	0	1	0	1	0	1	1	1	1	0	0	1	1	0	0	0	1	0	0	1	1	1	1	1	0	0	1	1	0	0	1	0	0
1	1	0	1	0	0	1	0	0	1	0	1	0	0	0	0	1	0	1	0	1	0	1	1	1	1	0	0	1	0	1	0	0	1	1	0	1	1	1	1	1	0	0	1	1	0	0	1	0	0
1	1	1	1	0	1	1	0	1	1	0	1	0	0	0	0	0	0	1	1	1	0	1	1	1	1	1	0	1	0	1	0	0	1	1	0	1	1	1	1	1	0	1	0	1	0	0	1	0	0
0	1	0	1	0	1	1	0	1	1	0	1	0	0	0	0	0	0	1	1	1	0	0	1	1	1	1	0	1	1	1	0	0	0	0	0	1	1	1	1	1	0	1	0	1	0	0	1	0	0
0	1	0	0	0	0	1	0	1	1	0	0	0	0	0	0	0	0	1	0	1	0	1	0	1	0	0	0	0	1	1	0	0	1	0	0	1	1	1	1	0	0	0	1	1	0	0	1	0	0
1	0	0	1	0	0	0	0	1	1	0	1	0	0	0	0	1	0	1	0	1	0	1	1	1	1	0	0	1	0	0	0	0	1	1	0	1	1	1	1	1	0	0	1	1	0	0	1	0	0
1	1	1	1	0	0	1	0	0	1	0	1	0	0	0	0	0	0	1	1	1	0	0	1	1	1	1	0	1	0	1	0	0	0	1	0	1	1	1	1	1	0	1	0	1	0	0	1	0	0
0	1	0	0	0	1	1	0	1	1	0	0	0	0	0	0	0	0	1	1	1	0	1	0	1	0	1	0	0	1	1	0	0	1	0	0	1	1	1	1	0	0	1	0	1	0	0	1	0	0
Attractor	39
Type	:	cyclic
Ratio	:	0.00699
AKT	AP1	Apoptosis	ATF2	ATM	BCL2	CREB	DNA_damage	DUSP1	EGFR	EGFR_stimulus	ELK1	ERK	FGFR3	FGFR3_stimulus	FOS	FOXO3	FRS2	GAB1	GADD45	GRB2	Growth_Arrest	JNK	JUN	MAP3K1_3	MAX	MDM2	MEK1_2	MSK	MTK1	MYC	p14	p21	p38	p53	p70	PDK1	PI3K	PKC	PLCG	PPP2CA	Proliferation	PTEN	RAF	RAS	RSK	SMAD	SOS	SPRY	TAK1
0	0	0	0	0	1	0	0	1	1	1	0	0	0	0	0	0	0	1	0	1	0	1	0	1	0	1	0	0	1	0	0	0	1	0	0	1	1	1	1	0	0	0	0	1	0	0	1	0	0
1	0	0	1	0	0	0	0	0	1	1	1	0	0	0	0	1	0	1	0	1	0	1	1	1	1	0	1	1	0	0	0	0	1	0	0	1	1	1	1	1	0	0	1	1	0	0	1	0	0
1	1	0	1	0	0	1	0	0	1	1	1	1	0	0	0	0	0	1	0	1	0	1	1	1	1	1	0	1	0	1	0	0	1	1	0	1	1	1	1	1	0	0	0	1	0	0	1	0	0
1	1	0	1	0	1	1	0	1	1	1	1	0	0	0	0	0	0	1	1	1	0	1	1	1	1	1	0	1	0	1	0	0	1	0	1	1	1	1	1	1	0	1	0	1	1	0	1	1	0
0	1	0	1	0	1	1	0	1	1	1	1	0	0	0	0	0	0	1	0	1	0	0	1	1	1	1	0	1	1	1	0	0	0	0	0	1	1	1	1	1	1	0	0	1	0	0	0	0	0
1	1	0	0	0	0	1	0	1	1	1	0	0	0	0	0	0	0	1	0	1	0	1	0	1	0	0	0	0	0	1	0	0	1	0	0	1	1	1	1	0	0	0	1	1	0	0	1	0	0
1	0	0	1	0	1	0	0	1	1	1	1	0	0	0	0	0	0	1	0	1	0	0	1	1	1	1	0	1	0	0	0	0	0	1	0	1	1	1	1	1	0	0	0	1	0	0	1	0	0
1	1	0	0	0	0	1	0	0	1	1	0	0	0	0	0	0	0	1	1	1	0	0	0	1	0	1	0	0	0	1	0	0	0	0	0	1	1	1	1	0	0	1	0	1	0	0	1	0	0
Attractor	40
Type	:	cyclic
Ratio	:	0.00351
AKT	AP1	Apoptosis	ATF2	ATM	BCL2	CREB	DNA_damage	DUSP1	EGFR	EGFR_stimulus	ELK1	ERK	FGFR3	FGFR3_stimulus	FOS	FOXO3	FRS2	GAB1	GADD45	GRB2	Growth_Arrest	JNK	JUN	MAP3K1_3	MAX	MDM2	MEK1_2	MSK	MTK1	MYC	p14	p21	p38	p53	p70	PDK1	PI3K	PKC	PLCG	PPP2CA	Proliferation	PTEN	RAF	RAS	RSK	SMAD	SOS	SPRY	TAK1
0	0	0	1	0	1	0	0	1	1	0	1	0	0	1	0	0	0	1	0	1	0	1	1	1	1	1	0	1	1	0	0	0	1	0	1	1	1	1	1	1	0	0	0	1	1	0	1	1	0
1	1	0	1	0	0	1	0	0	1	0	1	0	0	1	0	1	0	1	0	1	0	1	1	1	1	0	0	1	0	1	0	0	1	0	0	1	1	1	1	1	0	0	1	1	0	0	0	0	0
1	1	0	1	0	1	1	0	1	1	0	1	0	0	1	0	0	0	1	0	1	0	1	1	1	1	1	0	1	0	1	0	0	1	1	0	1	1	1	1	1	0	0	0	1	0	0	1	0	0
1	1	0	1	0	1	1	0	1	1	0	1	0	0	1	0	0	0	1	1	1	0	0	1	1	1	1	0	1	0	1	0	0	0	0	0	1	1	1	1	1	0	1	0	1	0	0	1	0	0
0	1	0	0	0	1	1	0	1	1	0	0	0	0	1	0	0	0	1	0	1	0	0	0	1	0	1	0	0	1	1	0	0	0	0	0	1	1	1	1	0	0	0	0	1	0	0	1	0	0
1	0	0	0	0	0	0	0	1	1	0	0	0	0	1	0	0	0	1	0	1	0	1	0	1	0	0	0	0	0	0	0	0	1	0	0	1	1	1	1	0	0	0	1	1	0	0	1	0	0
1	0	0	1	0	0	0	0	0	1	0	1	0	0	1	0	0	0	1	0	1	0	0	1	1	1	1	1	1	0	0	0	0	0	1	0	1	1	1	1	1	0	0	0	1	0	0	1	0	0
1	1	0	0	0	0	1	0	0	1	0	0	1	0	1	0	0	0	1	1	1	0	1	0	1	0	1	0	0	0	1	0	0	1	0	0	1	1	1	1	0	0	1	0	1	0	0	1	0	0
Attractor	41
Type	:	cyclic
Ratio	:	0.00347
AKT	AP1	Apoptosis	ATF2	ATM	BCL2	CREB	DNA_damage	DUSP1	EGFR	EGFR_stimulus	ELK1	ERK	FGFR3	FGFR3_stimulus	FOS	FOXO3	FRS2	GAB1	GADD45	GRB2	Growth_Arrest	JNK	JUN	MAP3K1_3	MAX	MDM2	MEK1_2	MSK	MTK1	MYC	p14	p21	p38	p53	p70	PDK1	PI3K	PKC	PLCG	PPP2CA	Proliferation	PTEN	RAF	RAS	RSK	SMAD	SOS	SPRY	TAK1
0	0	0	1	0	1	0	0	1	1	1	1	0	0	1	0	0	0	1	0	1	0	1	1	1	1	1	0	1	1	0	0	0	1	0	1	1	1	1	1	1	0	0	0	1	1	0	1	1	0
1	1	0	1	0	0	1	0	0	1	1	1	0	0	1	0	1	0	1	0	1	0	1	1	1	1	0	0	1	0	1	0	0	1	0	0	1	1	1	1	1	0	0	1	1	0	0	0	0	0
1	1	0	1	0	1	1	0	1	1	1	1	0	0	1	0	0	0	1	0	1	0	1	1	1	1	1	0	1	0	1	0	0	1	1	0	1	1	1	1	1	0	0	0	1	0	0	1	0	0
1	1	0	1	0	1	1	0	1	1	1	1	0	0	1	0	0	0	1	1	1	0	0	1	1	1	1	0	1	0	1	0	0	0	0	0	1	1	1	1	1	0	1	0	1	0	0	1	0	0
0	1	0	0	0	1	1	0	1	1	1	0	0	0	1	0	0	0	1	0	1	0	0	0	1	0	1	0	0	1	1	0	0	0	0	0	1	1	1	1	0	0	0	0	1	0	0	1	0	0
1	0	0	0	0	0	0	0	1	1	1	0	0	0	1	0	0	0	1	0	1	0	1	0	1	0	0	0	0	0	0	0	0	1	0	0	1	1	1	1	0	0	0	1	1	0	0	1	0	0
1	0	0	1	0	0	0	0	0	1	1	1	0	0	1	0	0	0	1	0	1	0	0	1	1	1	1	1	1	0	0	0	0	0	1	0	1	1	1	1	1	0	0	0	1	0	0	1	0	0
1	1	0	0	0	0	1	0	0	1	1	0	1	0	1	0	0	0	1	1	1	0	1	0	1	0	1	0	0	0	1	0	0	1	0	0	1	1	1	1	0	0	1	0	1	0	0	1	0	0
Attractor	42
Type	:	cyclic
Ratio	:	0.00344
AKT	AP1	Apoptosis	ATF2	ATM	BCL2	CREB	DNA_damage	DUSP1	EGFR	EGFR_stimulus	ELK1	ERK	FGFR3	FGFR3_stimulus	FOS	FOXO3	FRS2	GAB1	GADD45	GRB2	Growth_Arrest	JNK	JUN	MAP3K1_3	MAX	MDM2	MEK1_2	MSK	MTK1	MYC	p14	p21	p38	p53	p70	PDK1	PI3K	PKC	PLCG	PPP2CA	Proliferation	PTEN	RAF	RAS	RSK	SMAD	SOS	SPRY	TAK1
0	0	0	1	0	1	0	0	1	1	0	1	0	0	1	0	0	0	1	0	1	0	0	1	1	1	1	0	1	1	0	0	0	0	0	0	1	1	1	1	1	0	0	0	1	0	0	1	0	0
1	1	0	0	0	0	1	0	0	1	0	0	0	0	1	0	0	0	1	0	1	0	1	0	1	0	0	0	0	0	1	0	0	1	0	0	1	1	1	1	0	0	0	1	1	0	0	1	0	0
1	0	0	1	0	1	0	0	1	1	0	1	0	0	1	0	0	0	1	0	1	0	1	1	1	1	1	0	1	0	0	0	0	1	1	0	1	1	1	1	1	0	0	0	1	0	0	1	0	0
1	1	0	1	0	0	1	0	0	1	0	1	0	0	1	0	0	0	1	1	1	0	0	1	1	1	1	0	1	0	1	0	0	0	0	0	1	1	1	1	1	0	1	0	1	0	0	1	0	0
0	1	0	0	0	1	1	0	1	1	0	0	0	0	1	0	0	0	1	0	1	0	1	0	1	0	1	0	0	1	1	0	0	1	0	0	1	1	1	1	0	0	0	0	1	0	0	1	0	0
1	0	0	1	0	0	0	0	1	1	0	1	0	0	1	0	1	0	1	0	1	0	1	1	1	1	0	0	1	0	0	0	0	1	0	0	1	1	1	1	1	0	0	1	1	0	0	1	0	0
1	1	0	1	0	0	1	0	0	1	0	1	0	0	1	0	0	0	1	0	1	0	0	1	1	1	1	0	1	0	1	0	0	0	1	0	1	1	1	1	1	0	0	0	1	0	0	1	0	0
1	1	0	0	0	1	1	0	1	1	0	0	0	0	1	0	0	0	1	1	1	0	1	0	1	0	1	0	0	0	1	0	0	1	0	0	1	1	1	1	0	0	1	0	1	0	0	1	0	0
Attractor	43
Type	:	cyclic
Ratio	:	0.00205
AKT	AP1	Apoptosis	ATF2	ATM	BCL2	CREB	DNA_damage	DUSP1	EGFR	EGFR_stimulus	ELK1	ERK	FGFR3	FGFR3_stimulus	FOS	FOXO3	FRS2	GAB1	GADD45	GRB2	Growth_Arrest	JNK	JUN	MAP3K1_3	MAX	MDM2	MEK1_2	MSK	MTK1	MYC	p14	p21	p38	p53	p70	PDK1	PI3K	PKC	PLCG	PPP2CA	Proliferation	PTEN	RAF	RAS	RSK	SMAD	SOS	SPRY	TAK1
1	0	0	0	0	0	0	0	0	1	1	0	0	0	1	0	0	0	1	0	1	0	0	0	1	0	1	1	0	0	0	0	0	0	0	0	1	1	1	1	0	0	0	0	1	0	0	1	0	0
1	0	0	0	0	0	0	0	0	1	1	0	1	0	1	0	0	0	1	0	1	0	1	0	1	0	1	1	0	0	0	0	0	1	0	0	1	1	1	1	0	0	0	0	1	0	0	1	0	0
1	0	0	1	0	0	0	0	0	1	1	1	1	0	1	0	0	0	1	0	1	0	1	1	1	1	1	1	1	0	0	0	0	1	0	1	1	1	1	1	1	0	0	0	1	1	0	1	1	0
1	1	0	1	0	0	1	0	0	1	1	1	1	0	1	1	0	0	1	0	1	0	1	1	1	1	1	0	1	0	1	0	0	1	0	1	1	1	1	1	1	0	0	0	1	1	0	0	1	0
1	1	0	1	0	1	1	0	1	1	1	1	0	0	1	1	0	0	1	0	1	0	1	1	1	1	1	0	1	0	1	0	0	1	0	1	1	1	1	1	1	1	0	0	1	1	0	0	1	0
1	1	0	1	0	1	1	0	1	1	1	1	0	0	1	0	0	0	1	0	1	0	0	1	1	1	1	0	1	0	1	0	0	0	0	0	1	1	1	1	1	1	0	0	1	0	0	0	0	0
1	1	0	0	0	1	1	0	1	1	1	0	0	0	1	0	0	0	1	0	1	0	0	0	1	0	1	0	0	0	1	0	0	0	0	0	1	1	1	1	0	0	0	0	1	0	0	1	0	0
1	0	0	0	0	1	0	0	1	1	1	0	0	0	1	0	0	0	1	0	1	0	0	0	1	0	1	0	0	0	0	0	0	0	0	0	1	1	1	1	0	0	0	0	1	0	0	1	0	0
Attractor	44
Type	:	cyclic
Ratio	:	0.00682
AKT	AP1	Apoptosis	ATF2	ATM	BCL2	CREB	DNA_damage	DUSP1	EGFR	EGFR_stimulus	ELK1	ERK	FGFR3	FGFR3_stimulus	FOS	FOXO3	FRS2	GAB1	GADD45	GRB2	Growth_Arrest	JNK	JUN	MAP3K1_3	MAX	MDM2	MEK1_2	MSK	MTK1	MYC	p14	p21	p38	p53	p70	PDK1	PI3K	PKC	PLCG	PPP2CA	Proliferation	PTEN	RAF	RAS	RSK	SMAD	SOS	SPRY	TAK1
0	0	0	0	0	1	0	0	1	1	0	0	0	0	1	0	0	0	1	0	1	0	0	0	1	0	1	0	0	1	0	0	0	0	0	0	1	1	1	1	0	0	0	0	1	0	0	1	0	0
1	0	0	0	0	0	0	0	0	1	0	0	0	0	1	0	0	0	1	0	1	0	1	0	1	0	0	1	0	0	0	0	0	1	0	0	1	1	1	1	0	0	0	1	1	0	0	1	0	0
1	0	0	1	0	0	0	0	0	1	0	1	1	0	1	0	0	0	1	0	1	0	1	1	1	1	1	1	1	0	0	0	0	1	1	0	1	1	1	1	1	0	0	0	1	0	0	1	0	0
1	1	0	1	0	0	1	0	0	1	0	1	1	0	1	0	0	0	1	1	1	0	1	1	1	1	1	0	1	0	1	0	0	1	0	1	1	1	1	1	1	0	1	0	1	1	0	1	1	0
0	1	0	1	0	1	1	0	1	1	0	1	0	0	1	1	0	0	1	0	1	0	1	1	1	1	1	0	1	1	1	0	0	1	0	1	1	1	1	1	1	1	0	0	1	1	0	0	1	0
1	1	0	1	0	0	1	0	1	1	0	1	0	0	1	0	1	0	1	0	1	0	1	1	1	1	0	0	1	0	1	0	0	1	0	0	1	1	1	1	1	1	0	1	1	0	0	0	0	0
1	1	0	1	0	1	1	0	1	1	0	1	0	0	1	0	0	0	1	0	1	0	0	1	1	1	1	0	1	0	1	0	0	0	1	0	1	1	1	1	1	0	0	0	1	0	0	1	0	0
1	1	0	0	0	1	1	0	1	1	0	0	0	0	1	0	0	0	1	1	1	0	0	0	1	0	1	0	0	0	1	0	0	0	0	0	1	1	1	1	0	0	1	0	1	0	0	1	0	0
Attractor	45
Type	:	point
Ratio	:	0.00082
AKT	AP1	Apoptosis	ATF2	ATM	BCL2	CREB	DNA_damage	DUSP1	EGFR	EGFR_stimulus	ELK1	ERK	FGFR3	FGFR3_stimulus	FOS	FOXO3	FRS2	GAB1	GADD45	GRB2	Growth_Arrest	JNK	JUN	MAP3K1_3	MAX	MDM2	MEK1_2	MSK	MTK1	MYC	p14	p21	p38	p53	p70	PDK1	PI3K	PKC	PLCG	PPP2CA	Proliferation	PTEN	RAF	RAS	RSK	SMAD	SOS	SPRY	TAK1
1	1	0	1	0	1	1	0	1	1	0	1	0	0	0	0	0	0	1	1	1	0	1	1	1	1	1	0	1	1	1	0	0	1	0	0	1	1	1	1	1	0	0	0	1	0	1	1	0	1
Attractor	46
Type	:	point
Ratio	:	0.00087
AKT	AP1	Apoptosis	ATF2	ATM	BCL2	CREB	DNA_damage	DUSP1	EGFR	EGFR_stimulus	ELK1	ERK	FGFR3	FGFR3_stimulus	FOS	FOXO3	FRS2	GAB1	GADD45	GRB2	Growth_Arrest	JNK	JUN	MAP3K1_3	MAX	MDM2	MEK1_2	MSK	MTK1	MYC	p14	p21	p38	p53	p70	PDK1	PI3K	PKC	PLCG	PPP2CA	Proliferation	PTEN	RAF	RAS	RSK	SMAD	SOS	SPRY	TAK1
1	1	0	1	0	1	1	0	1	1	0	1	0	0	1	0	0	0	1	1	1	0	1	1	1	1	1	0	1	1	1	0	0	1	0	0	1	1	1	1	1	0	0	0	1	0	1	1	0	1
Attractor	47
Type	:	cyclic
Ratio	:	0.00339
AKT	AP1	Apoptosis	ATF2	ATM	BCL2	CREB	DNA_damage	DUSP1	EGFR	EGFR_stimulus	ELK1	ERK	FGFR3	FGFR3_stimulus	FOS	FOXO3	FRS2	GAB1	GADD45	GRB2	Growth_Arrest	JNK	JUN	MAP3K1_3	MAX	MDM2	MEK1_2	MSK	MTK1	MYC	p14	p21	p38	p53	p70	PDK1	PI3K	PKC	PLCG	PPP2CA	Proliferation	PTEN	RAF	RAS	RSK	SMAD	SOS	SPRY	TAK1
0	0	0	1	0	1	0	0	1	1	0	1	0	0	0	0	0	0	1	0	1	0	0	1	1	1	1	0	1	1	0	0	0	0	0	0	1	1	1	1	1	0	0	0	1	0	0	1	0	0
1	1	0	0	0	0	1	0	0	1	0	0	0	0	0	0	0	0	1	0	1	0	1	0	1	0	0	0	0	0	1	0	0	1	0	0	1	1	1	1	0	0	0	1	1	0	0	1	0	0
1	0	0	1	0	1	0	0	1	1	0	1	0	0	0	0	0	0	1	0	1	0	1	1	1	1	1	0	1	0	0	0	0	1	1	0	1	1	1	1	1	0	0	0	1	0	0	1	0	0
1	1	0	1	0	0	1	0	0	1	0	1	0	0	0	0	0	0	1	1	1	0	0	1	1	1	1	0	1	0	1	0	0	0	0	0	1	1	1	1	1	0	1	0	1	0	0	1	0	0
0	1	0	0	0	1	1	0	1	1	0	0	0	0	0	0	0	0	1	0	1	0	1	0	1	0	1	0	0	1	1	0	0	1	0	0	1	1	1	1	0	0	0	0	1	0	0	1	0	0
1	0	0	1	0	0	0	0	1	1	0	1	0	0	0	0	1	0	1	0	1	0	1	1	1	1	0	0	1	0	0	0	0	1	0	0	1	1	1	1	1	0	0	1	1	0	0	1	0	0
1	1	0	1	0	0	1	0	0	1	0	1	0	0	0	0	0	0	1	0	1	0	0	1	1	1	1	0	1	0	1	0	0	0	1	0	1	1	1	1	1	0	0	0	1	0	0	1	0	0
1	1	0	0	0	1	1	0	1	1	0	0	0	0	0	0	0	0	1	1	1	0	1	0	1	0	1	0	0	0	1	0	0	1	0	0	1	1	1	1	0	0	1	0	1	0	0	1	0	0
Attractor	48
Type	:	cyclic
Ratio	:	0.00067
AKT	AP1	Apoptosis	ATF2	ATM	BCL2	CREB	DNA_damage	DUSP1	EGFR	EGFR_stimulus	ELK1	ERK	FGFR3	FGFR3_stimulus	FOS	FOXO3	FRS2	GAB1	GADD45	GRB2	Growth_Arrest	JNK	JUN	MAP3K1_3	MAX	MDM2	MEK1_2	MSK	MTK1	MYC	p14	p21	p38	p53	p70	PDK1	PI3K	PKC	PLCG	PPP2CA	Proliferation	PTEN	RAF	RAS	RSK	SMAD	SOS	SPRY	TAK1
1	0	0	0	0	1	0	0	1	1	1	0	0	0	0	0	0	0	1	0	1	0	1	0	1	0	1	0	0	0	0	0	0	1	0	0	1	1	1	1	0	0	0	0	1	0	0	1	0	0
1	0	0	1	0	0	0	0	0	1	1	1	0	0	0	0	0	0	1	0	1	0	0	1	1	1	1	1	1	0	0	0	0	0	0	0	1	1	1	1	1	0	0	0	1	0	0	1	0	0
1	1	0	0	0	0	1	0	0	1	1	0	1	0	0	0	0	0	1	0	1	0	1	0	1	0	1	0	0	0	1	0	0	1	0	0	1	1	1	1	0	0	0	0	1	0	0	1	0	0
1	0	0	1	0	1	0	0	1	1	1	1	0	0	0	0	0	0	1	0	1	0	1	1	1	1	1	0	1	0	0	0	0	1	0	1	1	1	1	1	1	0	0	0	1	1	0	1	1	0
1	1	0	1	0	0	1	0	0	1	1	1	0	0	0	0	0	0	1	0	1	0	0	1	1	1	1	0	1	0	1	0	0	0	0	0	1	1	1	1	1	0	0	0	1	0	0	0	0	0
1	1	0	0	0	1	1	0	1	1	1	0	0	0	0	0	0	0	1	0	1	0	1	0	1	0	1	0	0	0	1	0	0	1	0	0	1	1	1	1	0	0	0	0	1	0	0	1	0	0
1	0	0	1	0	1	0	0	1	1	1	1	0	0	0	0	0	0	1	0	1	0	0	1	1	1	1	0	1	0	0	0	0	0	0	0	1	1	1	1	1	0	0	0	1	0	0	1	0	0
1	1	0	0	0	0	1	0	0	1	1	0	0	0	0	0	0	0	1	0	1	0	0	0	1	0	1	0	0	0	1	0	0	0	0	0	1	1	1	1	0	0	0	0	1	0	0	1	0	0
Attractor	49
Type	:	cyclic
Ratio	:	0.00166
AKT	AP1	Apoptosis	ATF2	ATM	BCL2	CREB	DNA_damage	DUSP1	EGFR	EGFR_stimulus	ELK1	ERK	FGFR3	FGFR3_stimulus	FOS	FOXO3	FRS2	GAB1	GADD45	GRB2	Growth_Arrest	JNK	JUN	MAP3K1_3	MAX	MDM2	MEK1_2	MSK	MTK1	MYC	p14	p21	p38	p53	p70	PDK1	PI3K	PKC	PLCG	PPP2CA	Proliferation	PTEN	RAF	RAS	RSK	SMAD	SOS	SPRY	TAK1
1	0	0	0	0	0	0	0	0	1	0	0	0	0	1	0	0	0	1	0	1	0	0	0	1	0	1	1	0	0	0	0	0	0	0	0	1	1	1	1	0	0	0	0	1	0	0	1	0	0
1	0	0	0	0	0	0	0	0	1	0	0	1	0	1	0	0	0	1	0	1	0	1	0	1	0	1	1	0	0	0	0	0	1	0	0	1	1	1	1	0	0	0	0	1	0	0	1	0	0
1	0	0	1	0	0	0	0	0	1	0	1	1	0	1	0	0	0	1	0	1	0	1	1	1	1	1	1	1	0	0	0	0	1	0	1	1	1	1	1	1	0	0	0	1	1	0	1	1	0
1	1	0	1	0	0	1	0	0	1	0	1	1	0	1	1	0	0	1	0	1	0	1	1	1	1	1	0	1	0	1	0	0	1	0	1	1	1	1	1	1	0	0	0	1	1	0	0	1	0
1	1	0	1	0	1	1	0	1	1	0	1	0	0	1	1	0	0	1	0	1	0	1	1	1	1	1	0	1	0	1	0	0	1	0	1	1	1	1	1	1	1	0	0	1	1	0	0	1	0
1	1	0	1	0	1	1	0	1	1	0	1	0	0	1	0	0	0	1	0	1	0	0	1	1	1	1	0	1	0	1	0	0	0	0	0	1	1	1	1	1	1	0	0	1	0	0	0	0	0
1	1	0	0	0	1	1	0	1	1	0	0	0	0	1	0	0	0	1	0	1	0	0	0	1	0	1	0	0	0	1	0	0	0	0	0	1	1	1	1	0	0	0	0	1	0	0	1	0	0
1	0	0	0	0	1	0	0	1	1	0	0	0	0	1	0	0	0	1	0	1	0	0	0	1	0	1	0	0	0	0	0	0	0	0	0	1	1	1	1	0	0	0	0	1	0	0	1	0	0
Attractor	50
Type	:	cyclic
Ratio	:	0.00062
AKT	AP1	Apoptosis	ATF2	ATM	BCL2	CREB	DNA_damage	DUSP1	EGFR	EGFR_stimulus	ELK1	ERK	FGFR3	FGFR3_stimulus	FOS	FOXO3	FRS2	GAB1	GADD45	GRB2	Growth_Arrest	JNK	JUN	MAP3K1_3	MAX	MDM2	MEK1_2	MSK	MTK1	MYC	p14	p21	p38	p53	p70	PDK1	PI3K	PKC	PLCG	PPP2CA	Proliferation	PTEN	RAF	RAS	RSK	SMAD	SOS	SPRY	TAK1
1	0	0	0	0	1	0	0	1	1	1	0	0	0	1	0	0	0	1	0	1	0	1	0	1	0	1	0	0	0	0	0	0	1	0	0	1	1	1	1	0	0	0	0	1	0	0	1	0	0
1	0	0	1	0	0	0	0	0	1	1	1	0	0	1	0	0	0	1	0	1	0	0	1	1	1	1	1	1	0	0	0	0	0	0	0	1	1	1	1	1	0	0	0	1	0	0	1	0	0
1	1	0	0	0	0	1	0	0	1	1	0	1	0	1	0	0	0	1	0	1	0	1	0	1	0	1	0	0	0	1	0	0	1	0	0	1	1	1	1	0	0	0	0	1	0	0	1	0	0
1	0	0	1	0	1	0	0	1	1	1	1	0	0	1	0	0	0	1	0	1	0	1	1	1	1	1	0	1	0	0	0	0	1	0	1	1	1	1	1	1	0	0	0	1	1	0	1	1	0
1	1	0	1	0	0	1	0	0	1	1	1	0	0	1	0	0	0	1	0	1	0	0	1	1	1	1	0	1	0	1	0	0	0	0	0	1	1	1	1	1	0	0	0	1	0	0	0	0	0
1	1	0	0	0	1	1	0	1	1	1	0	0	0	1	0	0	0	1	0	1	0	1	0	1	0	1	0	0	0	1	0	0	1	0	0	1	1	1	1	0	0	0	0	1	0	0	1	0	0
1	0	0	1	0	1	0	0	1	1	1	1	0	0	1	0	0	0	1	0	1	0	0	1	1	1	1	0	1	0	0	0	0	0	0	0	1	1	1	1	1	0	0	0	1	0	0	1	0	0
1	1	0	0	0	0	1	0	0	1	1	0	0	0	1	0	0	0	1	0	1	0	0	0	1	0	1	0	0	0	1	0	0	0	0	0	1	1	1	1	0	0	0	0	1	0	0	1	0	0
Attractor	51
Type	:	point
Ratio	:	0.00086
AKT	AP1	Apoptosis	ATF2	ATM	BCL2	CREB	DNA_damage	DUSP1	EGFR	EGFR_stimulus	ELK1	ERK	FGFR3	FGFR3_stimulus	FOS	FOXO3	FRS2	GAB1	GADD45	GRB2	Growth_Arrest	JNK	JUN	MAP3K1_3	MAX	MDM2	MEK1_2	MSK	MTK1	MYC	p14	p21	p38	p53	p70	PDK1	PI3K	PKC	PLCG	PPP2CA	Proliferation	PTEN	RAF	RAS	RSK	SMAD	SOS	SPRY	TAK1
1	1	0	1	0	1	1	0	1	1	1	1	0	0	1	0	0	0	1	1	1	0	1	1	1	1	1	0	1	1	1	0	0	1	0	0	1	1	1	1	1	0	0	0	1	0	1	1	0	1
Attractor	52
Type	:	cyclic
Ratio	:	0.00066
2	AP1	Apoptosis	ATF2	ATM	BCL2	CREB	DNA_damage	DUSP1	EGFR	EGFR_stimulus	ELK1	ERK	FGFR3	FGFR3_stimulus	FOS	FOXO3	FRS2	GAB1	GADD45	GRB2	Growth_Arrest	JNK	JUN	MAP3K1_3	MAX	MDM2	MEK1_2	MSK	MTK1	MYC	p14	p21	p38	p53	p70	PDK1	PI3K	PKC	PLCG	PPP2CA	Proliferation	PTEN	RAF	RAS	RSK	SMAD	SOS	SPRY	TAK1
1	0	0	0	0	1	0	0	1	1	0	0	0	0	0	0	0	0	1	0	1	0	1	0	1	0	1	0	0	0	0	0	0	1	0	0	1	1	1	1	0	0	0	0	1	0	0	1	0	0
1	0	0	1	0	0	0	0	0	1	0	1	0	0	0	0	0	0	1	0	1	0	0	1	1	1	1	1	1	0	0	0	0	0	0	0	1	1	1	1	1	0	0	0	1	0	0	1	0	0
1	1	0	0	0	0	1	0	0	1	0	0	1	0	0	0	0	0	1	0	1	0	1	0	1	0	1	0	0	0	1	0	0	1	0	0	1	1	1	1	0	0	0	0	1	0	0	1	0	0
1	0	0	1	0	1	0	0	1	1	0	1	0	0	0	0	0	0	1	0	1	0	1	1	1	1	1	0	1	0	0	0	0	1	0	1	1	1	1	1	1	0	0	0	1	1	0	1	1	0
1	1	0	1	0	0	1	0	0	1	0	1	0	0	0	0	0	0	1	0	1	0	0	1	1	1	1	0	1	0	1	0	0	0	0	0	1	1	1	1	1	0	0	0	1	0	0	0	0	0
1	1	0	0	0	1	1	0	1	1	0	0	0	0	0	0	0	0	1	0	1	0	1	0	1	0	1	0	0	0	1	0	0	1	0	0	1	1	1	1	0	0	0	0	1	0	0	1	0	0
1	0	0	1	0	1	0	0	1	1	0	1	0	0	0	0	0	0	1	0	1	0	0	1	1	1	1	0	1	0	0	0	0	0	0	0	1	1	1	1	1	0	0	0	1	0	0	1	0	0
1	1	0	0	0	0	1	0	0	1	0	0	0	0	0	0	0	0	1	0	1	0	0	0	1	0	1	0	0	0	1	0	0	0	0	0	1	1	1	1	0	0	0	0	1	0	0	1	0	0
[truncated: 3 more columns]

## Sheet: r10_RealAttractors
Average Activity
AKT	AP1	Apoptosis	ATF2	ATM	BCL2	CREB	DNA_damage	DUSP1	EGFR	EGFR_stimulus	ELK1	ERK	FGFR3	FGFR3_stimulus	FOS	FOXO3	FRS2	GAB1	GADD45	GRB2	Growth_Arrest	JNK	JUN	MAP3K1_3	MAX	MDM2	MEK1_2	MSK	MTK1	MYC	p14	p21	p38	p53	p70	PDK1	PI3K	PKC	PLCG	PPP2CA	Proliferation	PTEN	RAF	RAS	RSK	SMAD	SOS	SPRY	TAK1
0.288687	0.925242	0.58952	0.925242	0.50076	0.244044	0.925242	0.50076	0.925242	0	0.50206	0.925242	0.0275388	1	0.49837	0.00480625	0.681199	0.249342	1	0.850485	0.749062	0.50076	0.925242	0.925242	1	0.925242	0.789447	0.0275388	0.925242	0.850485	0.925242	0	0.50076	0.925242	0.711312	0.0275388	1	1	1	1	0.925242	0.02467	0.711312	0.711312	1	0.0275388	0.49972	0.723119	0.0275388	0.49972
Attractor	1
Type	:	point
Ratio	:	0.06339
AKT	AP1	Apoptosis	ATF2	ATM	BCL2	CREB	DNA_damage	DUSP1	EGFR	EGFR_stimulus	ELK1	ERK	FGFR3	FGFR3_stimulus	FOS	FOXO3	FRS2	GAB1	GADD45	GRB2	Growth_Arrest	JNK	JUN	MAP3K1_3	MAX	MDM2	MEK1_2	MSK	MTK1	MYC	p14	p21	p38	p53	p70	PDK1	PI3K	PKC	PLCG	PPP2CA	Proliferation	PTEN	RAF	RAS	RSK	SMAD	SOS	SPRY	TAK1
0	1	1	1	1	0	1	1	1	0	0	1	0	1	1	0	1	0	1	1	1	1	1	1	1	1	1	0	1	1	1	0	1	1	1	0	1	1	1	1	1	0	1	1	1	0	1	1	0	1
Attractor	2
Type	:	cyclic
Ratio	:	0.06319
AKT	AP1	Apoptosis	ATF2	ATM	BCL2	CREB	DNA_damage	DUSP1	EGFR	EGFR_stimulus	ELK1	ERK	FGFR3	FGFR3_stimulus	FOS	FOXO3	FRS2	GAB1	GADD45	GRB2	Growth_Arrest	JNK	JUN	MAP3K1_3	MAX	MDM2	MEK1_2	MSK	MTK1	MYC	p14	p21	p38	p53	p70	PDK1	PI3K	PKC	PLCG	PPP2CA	Proliferation	PTEN	RAF	RAS	RSK	SMAD	SOS	SPRY	TAK1
0	1	1	1	1	0	1	1	1	0	0	1	0	1	0	0	1	0	1	1	0	1	1	1	1	1	1	0	1	1	1	0	1	1	1	0	1	1	1	1	1	0	1	1	1	0	0	1	0	0
0	1	1	1	1	0	1	1	1	0	0	1	0	1	0	0	1	1	1	1	0	1	1	1	1	1	1	0	1	1	1	0	1	1	1	0	1	1	1	1	1	0	1	1	1	0	0	0	0	0
0	1	1	1	1	0	1	1	1	0	0	1	0	1	0	0	1	1	1	1	1	1	1	1	1	1	1	0	1	1	1	0	1	1	1	0	1	1	1	1	1	0	1	1	1	0	0	0	0	0
0	1	1	1	1	0	1	1	1	0	0	1	0	1	0	0	1	0	1	1	1	1	1	1	1	1	1	0	1	1	1	0	1	1	1	0	1	1	1	1	1	0	1	1	1	0	0	1	0	0
Attractor	3
Type	:	cyclic
Ratio	:	0.01455
AKT	AP1	Apoptosis	ATF2	ATM	BCL2	CREB	DNA_damage	DUSP1	EGFR	EGFR_stimulus	ELK1	ERK	FGFR3	FGFR3_stimulus	FOS	FOXO3	FRS2	GAB1	GADD45	GRB2	Growth_Arrest	JNK	JUN	MAP3K1_3	MAX	MDM2	MEK1_2	MSK	MTK1	MYC	p14	p21	p38	p53	p70	PDK1	PI3K	PKC	PLCG	PPP2CA	Proliferation	PTEN	RAF	RAS	RSK	SMAD	SOS	SPRY	TAK1
0	0	0	0	0	0	0	0	1	0	0	0	0	1	0	0	0	0	1	0	0	0	1	0	1	0	0	0	0	1	0	0	0	1	0	0	1	1	1	1	0	0	0	1	1	0	0	1	0	0
1	0	0	1	0	0	0	0	0	0	0	1	0	1	0	0	1	1	1	0	0	0	1	1	1	1	0	1	1	0	0	0	0	1	1	0	1	1	1	1	1	0	0	1	1	0	0	0	0	0
1	1	1	1	0	0	1	0	0	0	0	1	1	1	0	0	0	1	1	1	1	0	1	1	1	1	1	0	1	0	1	0	0	1	1	0	1	1	1	1	1	0	1	0	1	0	0	0	0	0
0	1	0	1	0	1	1	0	1	0	0	1	0	1	0	0	0	0	1	1	1	0	1	1	1	1	1	0	1	1	1	0	0	1	0	1	1	1	1	1	1	0	1	0	1	1	0	1	1	0
0	1	0	1	0	0	1	0	1	0	0	1	0	1	0	0	1	0	1	0	0	0	1	1	1	1	0	0	1	1	1	0	0	1	0	0	1	1	1	1	1	1	0	1	1	0	0	0	0	0
1	1	0	1	0	0	1	0	1	0	0	1	0	1	0	0	1	1	1	0	0	0	1	1	1	1	0	0	1	0	1	0	0	1	1	0	1	1	1	1	1	0	0	1	1	0	0	0	0	0
1	1	1	1	0	1	1	0	1	0	0	1	0	1	0	0	0	1	1	1	1	0	0	1	1	1	1	0	1	0	1	0	0	0	1	0	1	1	1	1	1	0	1	0	1	0	0	0	0	0
0	1	0	0	0	1	1	0	1	0	0	0	0	1	0	0	0	0	1	1	1	0	0	0	1	0	1	0	0	1	1	0	0	0	0	0	1	1	1	1	0	0	1	0	1	0	0	1	0	0
Attractor	4
Type	:	cyclic
Ratio	:	0.01288
AKT	AP1	Apoptosis	ATF2	ATM	BCL2	CREB	DNA_damage	DUSP1	EGFR	EGFR_stimulus	ELK1	ERK	FGFR3	FGFR3_stimulus	FOS	FOXO3	FRS2	GAB1	GADD45	GRB2	Growth_Arrest	JNK	JUN	MAP3K1_3	MAX	MDM2	MEK1_2	MSK	MTK1	MYC	p14	p21	p38	p53	p70	PDK1	PI3K	PKC	PLCG	PPP2CA	Proliferation	PTEN	RAF	RAS	RSK	SMAD	SOS	SPRY	TAK1
0	1	0	1	0	1	1	0	1	0	0	1	0	1	0	0	0	0	1	1	1	0	1	1	1	1	1	0	1	1	1	0	0	1	0	0	1	1	1	1	1	0	0	0	1	0	1	1	0	1
1	1	0	1	0	0	1	0	1	0	0	1	0	1	0	0	1	0	1	1	1	0	1	1	1	1	0	0	1	1	1	0	0	1	0	0	1	1	1	1	1	0	0	1	1	0	1	1	0	1
1	1	0	1	0	1	1	0	1	0	0	1	0	1	0	0	0	0	1	1	1	0	1	1	1	1	1	0	1	1	1	0	0	1	1	0	1	1	1	1	1	0	0	0	1	0	1	1	0	1
1	1	0	1	0	1	1	0	1	0	0	1	0	1	0	0	0	0	1	1	1	0	1	1	1	1	1	0	1	1	1	0	0	1	0	0	1	1	1	1	1	0	1	0	1	0	1	1	0	1
Attractor	5
Type	:	point
Ratio	:	0.06296
AKT	AP1	Apoptosis	ATF2	ATM	BCL2	CREB	DNA_damage	DUSP1	EGFR	EGFR_stimulus	ELK1	ERK	FGFR3	FGFR3_stimulus	FOS	FOXO3	FRS2	GAB1	GADD45	GRB2	Growth_Arrest	JNK	JUN	MAP3K1_3	MAX	MDM2	MEK1_2	MSK	MTK1	MYC	p14	p21	p38	p53	p70	PDK1	PI3K	PKC	PLCG	PPP2CA	Proliferation	PTEN	RAF	RAS	RSK	SMAD	SOS	SPRY	TAK1
0	1	1	1	1	0	1	1	1	0	1	1	0	1	0	0	1	0	1	1	1	1	1	1	1	1	1	0	1	1	1	0	1	1	1	0	1	1	1	1	1	0	1	1	1	0	1	1	0	1
Attractor	6
Type	:	cyclic
Ratio	:	0.04796
AKT	AP1	Apoptosis	ATF2	ATM	BCL2	CREB	DNA_damage	DUSP1	EGFR	EGFR_stimulus	ELK1	ERK	FGFR3	FGFR3_stimulus	FOS	FOXO3	FRS2	GAB1	GADD45	GRB2	Growth_Arrest	JNK	JUN	MAP3K1_3	MAX	MDM2	MEK1_2	MSK	MTK1	MYC	p14	p21	p38	p53	p70	PDK1	PI3K	PKC	PLCG	PPP2CA	Proliferation	PTEN	RAF	RAS	RSK	SMAD	SOS	SPRY	TAK1
0	1	0	1	0	0	1	0	1	0	0	1	0	1	1	0	1	0	1	1	1	0	1	1	1	1	0	0	1	1	1	0	0	1	0	0	1	1	1	1	1	0	0	1	1	0	1	1	0	1
1	1	0	1	0	0	1	0	1	0	0	1	0	1	1	0	1	0	1	1	1	0	1	1	1	1	0	0	1	1	1	0	0	1	1	0	1	1	1	1	1	0	0	1	1	0	1	1	0	1
1	1	1	1	0	1	1	0	1	0	0	1	0	1	1	0	0	0	1	1	1	0	1	1	1	1	1	0	1	1	1	0	0	1	1	0	1	1	1	1	1	0	1	0	1	0	1	1	0	1
0	1	0	1	0	1	1	0	1	0	0	1	0	1	1	0	0	0	1	1	1	0	1	1	1	1	1	0	1	1	1	0	0	1	0	0	1	1	1	1	1	0	1	0	1	0	1	1	0	1
Attractor	7
Type	:	cyclic
Ratio	:	0.06274
AKT	AP1	Apoptosis	ATF2	ATM	BCL2	CREB	DNA_damage	DUSP1	EGFR	EGFR_stimulus	ELK1	ERK	FGFR3	FGFR3_stimulus	FOS	FOXO3	FRS2	GAB1	GADD45	GRB2	Growth_Arrest	JNK	JUN	MAP3K1_3	MAX	MDM2	MEK1_2	MSK	MTK1	MYC	p14	p21	p38	p53	p70	PDK1	PI3K	PKC	PLCG	PPP2CA	Proliferation	PTEN	RAF	RAS	RSK	SMAD	SOS	SPRY	TAK1
0	1	1	1	1	0	1	1	1	0	1	1	0	1	1	0	1	0	1	1	0	1	1	1	1	1	1	0	1	1	1	0	1	1	1	0	1	1	1	1	1	0	1	1	1	0	0	1	0	0
0	1	1	1	1	0	1	1	1	0	1	1	0	1	1	0	1	1	1	1	0	1	1	1	1	1	1	0	1	1	1	0	1	1	1	0	1	1	1	1	1	0	1	1	1	0	0	0	0	0
0	1	1	1	1	0	1	1	1	0	1	1	0	1	1	0	1	1	1	1	1	1	1	1	1	1	1	0	1	1	1	0	1	1	1	0	1	1	1	1	1	0	1	1	1	0	0	0	0	0
0	1	1	1	1	0	1	1	1	0	1	1	0	1	1	0	1	0	1	1	1	1	1	1	1	1	1	0	1	1	1	0	1	1	1	0	1	1	1	1	1	0	1	1	1	0	0	1	0	0
Attractor	8
Type	:	cyclic
Ratio	:	0.01239
AKT	AP1	Apoptosis	ATF2	ATM	BCL2	CREB	DNA_damage	DUSP1	EGFR	EGFR_stimulus	ELK1	ERK	FGFR3	FGFR3_stimulus	FOS	FOXO3	FRS2	GAB1	GADD45	GRB2	Growth_Arrest	JNK	JUN	MAP3K1_3	MAX	MDM2	MEK1_2	MSK	MTK1	MYC	p14	p21	p38	p53	p70	PDK1	PI3K	PKC	PLCG	PPP2CA	Proliferation	PTEN	RAF	RAS	RSK	SMAD	SOS	SPRY	TAK1
0	0	0	0	0	0	0	0	1	0	0	0	0	1	1	0	0	0	1	0	1	0	1	0	1	0	0	0	0	1	0	0	0	1	0	0	1	1	1	1	0	0	0	1	1	0	0	1	0	0
1	0	0	1	0	0	0	0	0	0	0	1	0	1	1	0	1	0	1	0	0	0	1	1	1	1	0	1	1	0	0	0	0	1	1	0	1	1	1	1	1	0	0	1	1	0	0	1	0	0
1	1	1	1	0	0	1	0	0	0	0	1	1	1	1	0	0	1	1	1	0	0	1	1	1	1	1	0	1	0	1	0	0	1	1	0	1	1	1	1	1	0	1	0	1	0	0	0	0	0
0	1	0	1	0	1	1	0	1	0	0	1	0	1	1	0	0	1	1	1	1	0	1	1	1	1	1	0	1	1	1	0	0	1	0	1	1	1	1	1	1	0	1	0	1	1	0	0	1	0
0	1	0	1	0	0	1	0	1	0	0	1	0	1	1	0	1	0	1	0	1	0	1	1	1	1	0	0	1	1	1	0	0	1	0	0	1	1	1	1	1	1	0	1	1	0	0	0	0	0
1	1	0	1	0	0	1	0	1	0	0	1	0	1	1	0	1	0	1	0	0	0	1	1	1	1	0	0	1	0	1	0	0	1	1	0	1	1	1	1	1	0	0	1	1	0	0	1	0	0
1	1	1	1	0	1	1	0	1	0	0	1	0	1	1	0	0	1	1	1	0	0	0	1	1	1	1	0	1	0	1	0	0	0	1	0	1	1	1	1	1	0	1	0	1	0	0	0	0	0
0	1	0	0	0	1	1	0	1	0	0	0	0	1	1	0	0	1	1	1	1	0	0	0	1	0	1	0	0	1	1	0	0	0	0	0	1	1	1	1	0	0	1	0	1	0	0	0	0	0
Attractor	9
Type	:	point
Ratio	:	0.06178
AKT	AP1	Apoptosis	ATF2	ATM	BCL2	CREB	DNA_damage	DUSP1	EGFR	EGFR_stimulus	ELK1	ERK	FGFR3	FGFR3_stimulus	FOS	FOXO3	FRS2	GAB1	GADD45	GRB2	Growth_Arrest	JNK	JUN	MAP3K1_3	MAX	MDM2	MEK1_2	MSK	MTK1	MYC	p14	p21	p38	p53	p70	PDK1	PI3K	PKC	PLCG	PPP2CA	Proliferation	PTEN	RAF	RAS	RSK	SMAD	SOS	SPRY	TAK1
0	1	1	1	1	0	1	1	1	0	1	1	0	1	1	0	1	0	1	1	1	1	1	1	1	1	1	0	1	1	1	0	1	1	1	0	1	1	1	1	1	0	1	1	1	0	1	1	0	1
Attractor	10
Type	:	cyclic
Ratio	:	0.0067
AKT	AP1	Apoptosis	ATF2	ATM	BCL2	CREB	DNA_damage	DUSP1	EGFR	EGFR_stimulus	ELK1	ERK	FGFR3	FGFR3_stimulus	FOS	FOXO3	FRS2	GAB1	GADD45	GRB2	Growth_Arrest	JNK	JUN	MAP3K1_3	MAX	MDM2	MEK1_2	MSK	MTK1	MYC	p14	p21	p38	p53	p70	PDK1	PI3K	PKC	PLCG	PPP2CA	Proliferation	PTEN	RAF	RAS	RSK	SMAD	SOS	SPRY	TAK1
0	0	0	0	0	1	0	0	1	0	0	0	0	1	1	0	0	0	1	0	1	0	0	0	1	0	1	0	0	1	0	0	0	0	0	0	1	1	1	1	0	0	0	0	1	0	0	1	0	0
1	0	0	0	0	0	0	0	0	0	0	0	0	1	1	0	0	0	1	0	0	0	1	0	1	0	0	1	0	0	0	0	0	1	0	0	1	1	1	1	0	0	0	1	1	0	0	1	0	0
1	0	0	1	0	0	0	0	0	0	0	1	1	1	1	0	0	1	1	0	0	0	1	1	1	1	1	1	1	0	0	0	0	1	1	0	1	1	1	1	1	0	0	0	1	0	0	0	0	0
1	1	0	1	0	0	1	0	0	0	0	1	1	1	1	0	0	1	1	1	1	0	1	1	1	1	1	0	1	0	1	0	0	1	0	1	1	1	1	1	1	0	1	0	1	1	0	0	1	0
0	1	0	1	0	1	1	0	1	0	0	1	0	1	1	1	0	0	1	0	1	0	1	1	1	1	1	0	1	1	1	0	0	1	0	1	1	1	1	1	1	1	0	0	1	1	0	0	1	0
1	1	0	1	0	0	1	0	1	0	0	1	0	1	1	0	1	0	1	0	0	0	1	1	1	1	0	0	1	0	1	0	0	1	0	0	1	1	1	1	1	1	0	1	1	0	0	0	0	0
1	1	0	1	0	1	1	0	1	0	0	1	0	1	1	0	0	1	1	0	0	0	0	1	1	1	1	0	1	0	1	0	0	0	1	0	1	1	1	1	1	0	0	0	1	0	0	0	0	0
1	1	0	0	0	1	1	0	1	0	0	0	0	1	1	0	0	1	1	1	1	0	0	0	1	0	1	0	0	0	1	0	0	0	0	0	1	1	1	1	0	0	1	0	1	0	0	0	0	0
Attractor	11
Type	:	cyclic
Ratio	:	0.04853
AKT	AP1	Apoptosis	ATF2	ATM	BCL2	CREB	DNA_damage	DUSP1	EGFR	EGFR_stimulus	ELK1	ERK	FGFR3	FGFR3_stimulus	FOS	FOXO3	FRS2	GAB1	GADD45	GRB2	Growth_Arrest	JNK	JUN	MAP3K1_3	MAX	MDM2	MEK1_2	MSK	MTK1	MYC	p14	p21	p38	p53	p70	PDK1	PI3K	PKC	PLCG	PPP2CA	Proliferation	PTEN	RAF	RAS	RSK	SMAD	SOS	SPRY	TAK1
0	1	0	1	0	0	1	0	1	0	1	1	0	1	1	0	1	0	1	1	1	0	1	1	1	1	0	0	1	1	1	0	0	1	0	0	1	1	1	1	1	0	0	1	1	0	1	1	0	1
1	1	0	1	0	0	1	0	1	0	1	1	0	1	1	0	1	0	1	1	1	0	1	1	1	1	0	0	1	1	1	0	0	1	1	0	1	1	1	1	1	0	0	1	1	0	1	1	0	1
1	1	1	1	0	1	1	0	1	0	1	1	0	1	1	0	0	0	1	1	1	0	1	1	1	1	1	0	1	1	1	0	0	1	1	0	1	1	1	1	1	0	1	0	1	0	1	1	0	1
0	1	0	1	0	1	1	0	1	0	1	1	0	1	1	0	0	0	1	1	1	0	1	1	1	1	1	0	1	1	1	0	0	1	0	0	1	1	1	1	1	0	1	0	1	0	1	1	0	1
Attractor	12
Type	:	cyclic
Ratio	:	0.05036
AKT	AP1	Apoptosis	ATF2	ATM	BCL2	CREB	DNA_damage	DUSP1	EGFR	EGFR_stimulus	ELK1	ERK	FGFR3	FGFR3_stimulus	FOS	FOXO3	FRS2	GAB1	GADD45	GRB2	Growth_Arrest	JNK	JUN	MAP3K1_3	MAX	MDM2	MEK1_2	MSK	MTK1	MYC	p14	p21	p38	p53	p70	PDK1	PI3K	PKC	PLCG	PPP2CA	Proliferation	PTEN	RAF	RAS	RSK	SMAD	SOS	SPRY	TAK1
0	1	0	1	0	0	1	0	1	0	1	1	0	1	0	0	1	0	1	1	1	0	1	1	1	1	0	0	1	1	1	0	0	1	0	0	1	1	1	1	1	0	0	1	1	0	1	1	0	1
1	1	0	1	0	0	1	0	1	0	1	1	0	1	0	0	1	0	1	1	1	0	1	1	1	1	0	0	1	1	1	0	0	1	1	0	1	1	1	1	1	0	0	1	1	0	1	1	0	1
1	1	1	1	0	1	1	0	1	0	1	1	0	1	0	0	0	0	1	1	1	0	1	1	1	1	1	0	1	1	1	0	0	1	1	0	1	1	1	1	1	0	1	0	1	0	1	1	0	1
0	1	0	1	0	1	1	0	1	0	1	1	0	1	0	0	0	0	1	1	1	0	1	1	1	1	1	0	1	1	1	0	0	1	0	0	1	1	1	1	1	0	1	0	1	0	1	1	0	1
Attractor	13
Type	:	cyclic
Ratio	:	0.0015
AKT	AP1	Apoptosis	ATF2	ATM	BCL2	CREB	DNA_damage	DUSP1	EGFR	EGFR_stimulus	ELK1	ERK	FGFR3	FGFR3_stimulus	FOS	FOXO3	FRS2	GAB1	GADD45	GRB2	Growth_Arrest	JNK	JUN	MAP3K1_3	MAX	MDM2	MEK1_2	MSK	MTK1	MYC	p14	p21	p38	p53	p70	PDK1	PI3K	PKC	PLCG	PPP2CA	Proliferation	PTEN	RAF	RAS	RSK	SMAD	SOS	SPRY	TAK1
1	0	0	0	0	0	0	0	0	0	0	0	0	1	1	0	0	0	1	0	1	0	0	0	1	0	1	1	0	0	0	0	0	0	0	0	1	1	1	1	0	0	0	0	1	0	0	1	0	0
1	0	0	0	0	0	0	0	0	0	0	0	1	1	1	0	0	0	1	0	0	0	1	0	1	0	1	1	0	0	0	0	0	1	0	0	1	1	1	1	0	0	0	0	1	0	0	1	0	0
1	0	0	1	0	0	0	0	0	0	0	1	1	1	1	0	0	1	1	0	0	0	1	1	1	1	1	1	1	0	0	0	0	1	0	1	1	1	1	1	1	0	0	0	1	1	0	0	1	0
1	1	0	1	0	0	1	0	0	0	0	1	1	1	1	1	0	0	1	0	1	0	1	1	1	1	1	0	1	0	1	0	0	1	0	1	1	1	1	1	1	0	0	0	1	1	0	0	1	0
1	1	0	1	0	1	1	0	1	0	0	1	0	1	1	1	0	0	1	0	0	0	1	1	1	1	1	0	1	0	1	0	0	1	0	1	1	1	1	1	1	1	0	0	1	1	0	0	1	0
1	1	0	1	0	1	1	0	1	0	0	1	0	1	1	0	0	0	1	0	0	0	0	1	1	1	1	0	1	0	1	0	0	0	0	0	1	1	1	1	1	1	0	0	1	0	0	0	0	0
1	1	0	0	0	1	1	0	1	0	0	0	0	1	1	0	0	1	1	0	0	0	0	0	1	0	1	0	0	0	1	0	0	0	0	0	1	1	1	1	0	0	0	0	1	0	0	0	0	0
1	0	0	0	0	1	0	0	1	0	0	0	0	1	1	0	0	1	1	0	1	0	0	0	1	0	1	0	0	0	0	0	0	0	0	0	1	1	1	1	0	0	0	0	1	0	0	0	0	0
Attractor	14
Type	:	cyclic
Ratio	:	0.00626
AKT	AP1	Apoptosis	ATF2	ATM	BCL2	CREB	DNA_damage	DUSP1	EGFR	EGFR_stimulus	ELK1	ERK	FGFR3	FGFR3_stimulus	FOS	FOXO3	FRS2	GAB1	GADD45	GRB2	Growth_Arrest	JNK	JUN	MAP3K1_3	MAX	MDM2	MEK1_2	MSK	MTK1	MYC	p14	p21	p38	p53	p70	PDK1	PI3K	PKC	PLCG	PPP2CA	Proliferation	PTEN	RAF	RAS	RSK	SMAD	SOS	SPRY	TAK1
0	0	0	0	0	1	0	0	1	0	0	0	0	1	0	0	0	0	1	0	1	0	0	0	1	0	1	0	0	1	0	0	0	0	0	0	1	1	1	1	0	0	0	0	1	0	0	1	0	0
1	0	0	0	0	0	0	0	0	0	0	0	0	1	0	0	0	0	1	0	0	0	1	0	1	0	0	1	0	0	0	0	0	1	0	0	1	1	1	1	0	0	0	1	1	0	0	1	0	0
1	0	0	1	0	0	0	0	0	0	0	1	1	1	0	0	0	1	1	0	0	0	1	1	1	1	1	1	1	0	0	0	0	1	1	0	1	1	1	1	1	0	0	0	1	0	0	0	0	0
1	1	0	1	0	0	1	0	0	0	0	1	1	1	0	0	0	1	1	1	1	0	1	1	1	1	1	0	1	0	1	0	0	1	0	1	1	1	1	1	1	0	1	0	1	1	0	0	1	0
0	1	0	1	0	1	1	0	1	0	0	1	0	1	0	1	0	0	1	0	1	0	1	1	1	1	1	0	1	1	1	0	0	1	0	1	1	1	1	1	1	1	0	0	1	1	0	0	1	0
1	1	0	1	0	0	1	0	1	0	0	1	0	1	0	0	1	0	1	0	0	0	1	1	1	1	0	0	1	0	1	0	0	1	0	0	1	1	1	1	1	1	0	1	1	0	0	0	0	0
1	1	0	1	0	1	1	0	1	0	0	1	0	1	0	0	0	1	1	0	0	0	0	1	1	1	1	0	1	0	1	0	0	0	1	0	1	1	1	1	1	0	0	0	1	0	0	0	0	0
1	1	0	0	0	1	1	0	1	0	0	0	0	1	0	0	0	1	1	1	1	0	0	0	1	0	1	0	0	0	1	0	0	0	0	0	1	1	1	1	0	0	1	0	1	0	0	0	0	0
Attractor	15
Type	:	cyclic
Ratio	:	0.00045
AKT	AP1	Apoptosis	ATF2	ATM	BCL2	CREB	DNA_damage	DUSP1	EGFR	EGFR_stimulus	ELK1	ERK	FGFR3	FGFR3_stimulus	FOS	FOXO3	FRS2	GAB1	GADD45	GRB2	Growth_Arrest	JNK	JUN	MAP3K1_3	MAX	MDM2	MEK1_2	MSK	MTK1	MYC	p14	p21	p38	p53	p70	PDK1	PI3K	PKC	PLCG	PPP2CA	Proliferation	PTEN	RAF	RAS	RSK	SMAD	SOS	SPRY	TAK1
0	0	0	1	0	1	0	0	1	0	0	1	0	1	0	0	0	0	1	0	1	0	0	1	1	1	1	0	1	1	0	0	0	0	0	0	1	1	1	1	1	0	0	0	1	0	0	1	0	0
1	1	0	0	0	0	1	0	0	0	0	0	0	1	0	0	0	0	1	0	0	0	1	0	1	0	0	0	0	0	1	0	0	1	0	0	1	1	1	1	0	0	0	1	1	0	0	1	0	0
1	0	0	1	0	1	0	0	1	0	0	1	0	1	0	0	0	1	1	0	0	0	1	1	1	1	1	0	1	0	0	0	0	1	1	0	1	1	1	1	1	0	0	0	1	0	0	0	0	0
1	1	0	1	0	0	1	0	0	0	0	1	0	1	0	0	0	1	1	1	1	0	0	1	1	1	1	0	1	0	1	0	0	0	0	0	1	1	1	1	1	0	1	0	1	0	0	0	0	0
0	1	0	0	0	1	1	0	1	0	0	0	0	1	0	0	0	0	1	0	1	0	1	0	1	0	1	0	0	1	1	0	0	1	0	0	1	1	1	1	0	0	0	0	1	0	0	1	0	0
1	0	0	1	0	0	0	0	1	0	0	1	0	1	0	0	1	0	1	0	0	0	1	1	1	1	0	0	1	0	0	0	0	1	0	0	1	1	1	1	1	0	0	1	1	0	0	1	0	0
1	1	0	1	0	0	1	0	0	0	0	1	0	1	0	0	0	1	1	0	0	0	0	1	1	1	1	0	1	0	1	0	0	0	1	0	1	1	1	1	1	0	0	0	1	0	0	0	0	0
1	1	0	0	0	1	1	0	1	0	0	0	0	1	0	0	0	1	1	1	1	0	1	0	1	0	1	0	0	0	1	0	0	1	0	0	1	1	1	1	0	0	1	0	1	0	0	0	0	0
Attractor	16
Type	:	cyclic
Ratio	:	0.01214
AKT	AP1	Apoptosis	ATF2	ATM	BCL2	CREB	DNA_damage	DUSP1	EGFR	EGFR_stimulus	ELK1	ERK	FGFR3	FGFR3_stimulus	FOS	FOXO3	FRS2	GAB1	GADD45	GRB2	Growth_Arrest	JNK	JUN	MAP3K1_3	MAX	MDM2	MEK1_2	MSK	MTK1	MYC	p14	p21	p38	p53	p70	PDK1	PI3K	PKC	PLCG	PPP2CA	Proliferation	PTEN	RAF	RAS	RSK	SMAD	SOS	SPRY	TAK1
0	0	0	0	0	0	0	0	1	0	1	0	0	1	0	0	0	0	1	0	1	0	1	0	1	0	0	0	0	1	0	0	0	1	0	0	1	1	1	1	0	0	0	1	1	0	0	1	0	0
1	0	0	1	0	0	0	0	0	0	1	1	0	1	0	0	1	0	1	0	0	0	1	1	1	1	0	1	1	0	0	0	0	1	1	0	1	1	1	1	1	0	0	1	1	0	0	1	0	0
1	1	1	1	0	0	1	0	0	0	1	1	1	1	0	0	0	1	1	1	0	0	1	1	1	1	1	0	1	0	1	0	0	1	1	0	1	1	1	1	1	0	1	0	1	0	0	0	0	0
0	1	0	1	0	1	1	0	1	0	1	1	0	1	0	0	0	1	1	1	1	0	1	1	1	1	1	0	1	1	1	0	0	1	0	1	1	1	1	1	1	0	1	0	1	1	0	0	1	0
0	1	0	1	0	0	1	0	1	0	1	1	0	1	0	0	1	0	1	0	1	0	1	1	1	1	0	0	1	1	1	0	0	1	0	0	1	1	1	1	1	1	0	1	1	0	0	0	0	0
1	1	0	1	0	0	1	0	1	0	1	1	0	1	0	0	1	0	1	0	0	0	1	1	1	1	0	0	1	0	1	0	0	1	1	0	1	1	1	1	1	0	0	1	1	0	0	1	0	0
1	1	1	1	0	1	1	0	1	0	1	1	0	1	0	0	0	1	1	1	0	0	0	1	1	1	1	0	1	0	1	0	0	0	1	0	1	1	1	1	1	0	1	0	1	0	0	0	0	0
0	1	0	0	0	1	1	0	1	0	1	0	0	1	0	0	0	1	1	1	1	0	0	0	1	0	1	0	0	1	1	0	0	0	0	0	1	1	1	1	0	0	1	0	1	0	0	0	0	0
Attractor	17
Type	:	cyclic
Ratio	:	0.06202
AKT	AP1	Apoptosis	ATF2	ATM	BCL2	CREB	DNA_damage	DUSP1	EGFR	EGFR_stimulus	ELK1	ERK	FGFR3	FGFR3_stimulus	FOS	FOXO3	FRS2	GAB1	GADD45	GRB2	Growth_Arrest	JNK	JUN	MAP3K1_3	MAX	MDM2	MEK1_2	MSK	MTK1	MYC	p14	p21	p38	p53	p70	PDK1	PI3K	PKC	PLCG	PPP2CA	Proliferation	PTEN	RAF	RAS	RSK	SMAD	SOS	SPRY	TAK1
0	1	1	1	1	0	1	1	1	0	1	1	0	1	0	0	1	0	1	1	0	1	1	1	1	1	1	0	1	1	1	0	1	1	1	0	1	1	1	1	1	0	1	1	1	0	0	1	0	0
0	1	1	1	1	0	1	1	1	0	1	1	0	1	0	0	1	1	1	1	0	1	1	1	1	1	1	0	1	1	1	0	1	1	1	0	1	1	1	1	1	0	1	1	1	0	0	0	0	0
0	1	1	1	1	0	1	1	1	0	1	1	0	1	0	0	1	1	1	1	1	1	1	1	1	1	1	0	1	1	1	0	1	1	1	0	1	1	1	1	1	0	1	1	1	0	0	0	0	0
0	1	1	1	1	0	1	1	1	0	1	1	0	1	0	0	1	0	1	1	1	1	1	1	1	1	1	0	1	1	1	0	1	1	1	0	1	1	1	1	1	0	1	1	1	0	0	1	0	0
Attractor	18
Type	:	cyclic
Ratio	:	0.00363
AKT	AP1	Apoptosis	ATF2	ATM	BCL2	CREB	DNA_damage	DUSP1	EGFR	EGFR_stimulus	ELK1	ERK	FGFR3	FGFR3_stimulus	FOS	FOXO3	FRS2	GAB1	GADD45	GRB2	Growth_Arrest	JNK	JUN	MAP3K1_3	MAX	MDM2	MEK1_2	MSK	MTK1	MYC	p14	p21	p38	p53	p70	PDK1	PI3K	PKC	PLCG	PPP2CA	Proliferation	PTEN	RAF	RAS	RSK	SMAD	SOS	SPRY	TAK1
0	0	0	0	0	1	0	0	1	0	1	0	0	1	1	0	0	0	1	0	1	0	1	0	1	0	1	0	0	1	0	0	0	1	0	0	1	1	1	1	0	0	0	0	1	0	0	1	0	0
1	0	0	1	0	0	0	0	0	0	1	1	0	1	1	0	1	0	1	0	0	0	1	1	1	1	0	1	1	0	0	0	0	1	0	0	1	1	1	1	1	0	0	1	1	0	0	1	0	0
1	1	0	1	0	0	1	0	0	0	1	1	1	1	1	0	0	1	1	0	0	0	1	1	1	1	1	0	1	0	1	0	0	1	1	0	1	1	1	1	1	0	0	0	1	0	0	0	0	0
1	1	0	1	0	1	1	0	1	0	1	1	0	1	1	0	0	1	1	1	1	0	1	1	1	1	1	0	1	0	1	0	0	1	0	1	1	1	1	1	1	0	1	0	1	1	0	0	1	0
0	1	0	1	0	1	1	0	1	0	1	1	0	1	1	0	0	0	1	0	1	0	0	1	1	1	1	0	1	1	1	0	0	0	0	0	1	1	1	1	1	1	0	0	1	0	0	0	0	0
1	1	0	0	0	0	1	0	1	0	1	0	0	1	1	0	0	0	1	0	0	0	1	0	1	0	0	0	0	0	1	0	0	1	0	0	1	1	1	1	0	0	0	1	1	0	0	1	0	0
1	0	0	1	0	1	0	0	1	0	1	1	0	1	1	0	0	1	1	0	0	0	0	1	1	1	1	0	1	0	0	0	0	0	1	0	1	1	1	1	1	0	0	0	1	0	0	0	0	0
1	1	0	0	0	0	1	0	0	0	1	0	0	1	1	0	0	1	1	1	1	0	0	0	1	0	1	0	0	0	1	0	0	0	0	0	1	1	1	1	0	0	1	0	1	0	0	0	0	0
Attractor	19
Type	:	cyclic
Ratio	:	0.00342
AKT	AP1	Apoptosis	ATF2	ATM	BCL2	CREB	DNA_damage	DUSP1	EGFR	EGFR_stimulus	ELK1	ERK	FGFR3	FGFR3_stimulus	FOS	FOXO3	FRS2	GAB1	GADD45	GRB2	Growth_Arrest	JNK	JUN	MAP3K1_3	MAX	MDM2	MEK1_2	MSK	MTK1	MYC	p14	p21	p38	p53	p70	PDK1	PI3K	PKC	PLCG	PPP2CA	Proliferation	PTEN	RAF	RAS	RSK	SMAD	SOS	SPRY	TAK1
0	0	0	1	0	0	0	0	1	0	0	1	0	1	0	0	1	0	1	0	0	0	1	1	1	1	0	0	1	1	0	0	0	1	0	0	1	1	1	1	1	0	0	1	1	0	0	1	0	0
1	1	0	1	0	0	1	0	0	0	0	1	0	1	0	0	1	1	1	0	0	0	1	1	1	1	0	0	1	0	1	0	0	1	1	0	1	1	1	1	1	0	0	1	1	0	0	0	0	0
1	1	1	1	0	1	1	0	1	0	0	1	0	1	0	0	0	1	1	1	1	0	1	1	1	1	1	0	1	0	1	0	0	1	1	0	1	1	1	1	1	0	1	0	1	0	0	0	0	0
0	1	0	1	0	1	1	0	1	0	0	1	0	1	0	0	0	0	1	1	1	0	0	1	1	1	1	0	1	1	1	0	0	0	0	0	1	1	1	1	1	0	1	0	1	0	0	1	0	0
0	1	0	0	0	0	1	0	1	0	0	0	0	1	0	0	0	0	1	0	0	0	1	0	1	0	0	0	0	1	1	0	0	1	0	0	1	1	1	1	0	0	0	1	1	0	0	1	0	0
1	0	0	1	0	0	0	0	1	0	0	1	0	1	0	0	1	1	1	0	0	0	1	1	1	1	0	0	1	0	0	0	0	1	1	0	1	1	1	1	1	0	0	1	1	0	0	0	0	0
1	1	1	1	0	0	1	0	0	0	0	1	0	1	0	0	0	1	1	1	1	0	0	1	1	1	1	0	1	0	1	0	0	0	1	0	1	1	1	1	1	0	1	0	1	0	0	0	0	0
0	1	0	0	0	1	1	0	1	0	0	0	0	1	0	0	0	0	1	1	1	0	1	0	1	0	1	0	0	1	1	0	0	1	0	0	1	1	1	1	0	0	1	0	1	0	0	1	0	0
Attractor	20
Type	:	cyclic
Ratio	:	0.00348
AKT	AP1	Apoptosis	ATF2	ATM	BCL2	CREB	DNA_damage	DUSP1	EGFR	EGFR_stimulus	ELK1	ERK	FGFR3	FGFR3_stimulus	FOS	FOXO3	FRS2	GAB1	GADD45	GRB2	Growth_Arrest	JNK	JUN	MAP3K1_3	MAX	MDM2	MEK1_2	MSK	MTK1	MYC	p14	p21	p38	p53	p70	PDK1	PI3K	PKC	PLCG	PPP2CA	Proliferation	PTEN	RAF	RAS	RSK	SMAD	SOS	SPRY	TAK1
0	0	0	0	0	1	0	0	1	0	1	0	0	1	0	0	0	0	1	0	1	0	1	0	1	0	1	0	0	1	0	0	0	1	0	0	1	1	1	1	0	0	0	0	1	0	0	1	0	0
1	0	0	1	0	0	0	0	0	0	1	1	0	1	0	0	1	0	1	0	0	0	1	1	1	1	0	1	1	0	0	0	0	1	0	0	1	1	1	1	1	0	0	1	1	0	0	1	0	0
1	1	0	1	0	0	1	0	0	0	1	1	1	1	0	0	0	1	1	0	0	0	1	1	1	1	1	0	1	0	1	0	0	1	1	0	1	1	1	1	1	0	0	0	1	0	0	0	0	0
1	1	0	1	0	1	1	0	1	0	1	1	0	1	0	0	0	1	1	1	1	0	1	1	1	1	1	0	1	0	1	0	0	1	0	1	1	1	1	1	1	0	1	0	1	1	0	0	1	0
0	1	0	1	0	1	1	0	1	0	1	1	0	1	0	0	0	0	1	0	1	0	0	1	1	1	1	0	1	1	1	0	0	0	0	0	1	1	1	1	1	1	0	0	1	0	0	0	0	0
1	1	0	0	0	0	1	0	1	0	1	0	0	1	0	0	0	0	1	0	0	0	1	0	1	0	0	0	0	0	1	0	0	1	0	0	1	1	1	1	0	0	0	1	1	0	0	1	0	0
1	0	0	1	0	1	0	0	1	0	1	1	0	1	0	0	0	1	1	0	0	0	0	1	1	1	1	0	1	0	0	0	0	0	1	0	1	1	1	1	1	0	0	0	1	0	0	0	0	0
1	1	0	0	0	0	1	0	0	0	1	0	0	1	0	0	0	1	1	1	1	0	0	0	1	0	1	0	0	0	1	0	0	0	0	0	1	1	1	1	0	0	1	0	1	0	0	0	0	0
Attractor	21
Type	:	point
Ratio	:	0.06207
AKT	AP1	Apoptosis	ATF2	ATM	BCL2	CREB	DNA_damage	DUSP1	EGFR	EGFR_stimulus	ELK1	ERK	FGFR3	FGFR3_stimulus	FOS	FOXO3	FRS2	GAB1	GADD45	GRB2	Growth_Arrest	JNK	JUN	MAP3K1_3	MAX	MDM2	MEK1_2	MSK	MTK1	MYC	p14	p21	p38	p53	p70	PDK1	PI3K	PKC	PLCG	PPP2CA	Proliferation	PTEN	RAF	RAS	RSK	SMAD	SOS	SPRY	TAK1
0	1	1	1	1	0	1	1	1	0	0	1	0	1	0	0	1	0	1	1	1	1	1	1	1	1	1	0	1	1	1	0	1	1	1	0	1	1	1	1	1	0	1	1	1	0	1	1	0	1
Attractor	22
Type	:	cyclic
Ratio	:	0.01257
AKT	AP1	Apoptosis	ATF2	ATM	BCL2	CREB	DNA_damage	DUSP1	EGFR	EGFR_stimulus	ELK1	ERK	FGFR3	FGFR3_stimulus	FOS	FOXO3	FRS2	GAB1	GADD45	GRB2	Growth_Arrest	JNK	JUN	MAP3K1_3	MAX	MDM2	MEK1_2	MSK	MTK1	MYC	p14	p21	p38	p53	p70	PDK1	PI3K	PKC	PLCG	PPP2CA	Proliferation	PTEN	RAF	RAS	RSK	SMAD	SOS	SPRY	TAK1
0	1	0	1	0	1	1	0	1	0	1	1	0	1	1	0	0	0	1	1	1	0	1	1	1	1	1	0	1	1	1	0	0	1	0	0	1	1	1	1	1	0	0	0	1	0	1	1	0	1
1	1	0	1	0	0	1	0	1	0	1	1	0	1	1	0	1	0	1	1	1	0	1	1	1	1	0	0	1	1	1	0	0	1	0	0	1	1	1	1	1	0	0	1	1	0	1	1	0	1
1	1	0	1	0	1	1	0	1	0	1	1	0	1	1	0	0	0	1	1	1	0	1	1	1	1	1	0	1	1	1	0	0	1	1	0	1	1	1	1	1	0	0	0	1	0	1	1	0	1
1	1	0	1	0	1	1	0	1	0	1	1	0	1	1	0	0	0	1	1	1	0	1	1	1	1	1	0	1	1	1	0	0	1	0	0	1	1	1	1	1	0	1	0	1	0	1	1	0	1
Attractor	23
Type	:	cyclic
Ratio	:	0.00329
AKT	AP1	Apoptosis	ATF2	ATM	BCL2	CREB	DNA_damage	DUSP1	EGFR	EGFR_stimulus	ELK1	ERK	FGFR3	FGFR3_stimulus	FOS	FOXO3	FRS2	GAB1	GADD45	GRB2	Growth_Arrest	JNK	JUN	MAP3K1_3	MAX	MDM2	MEK1_2	MSK	MTK1	MYC	p14	p21	p38	p53	p70	PDK1	PI3K	PKC	PLCG	PPP2CA	Proliferation	PTEN	RAF	RAS	RSK	SMAD	SOS	SPRY	TAK1
0	0	0	1	0	0	0	0	1	0	0	1	0	1	1	0	1	0	1	0	0	0	1	1	1	1	0	0	1	1	0	0	0	1	0	0	1	1	1	1	1	0	0	1	1	0	0	1	0	0
1	1	0	1	0	0	1	0	0	0	0	1	0	1	1	0	1	1	1	0	0	0	1	1	1	1	0	0	1	0	1	0	0	1	1	0	1	1	1	1	1	0	0	1	1	0	0	0	0	0
1	1	1	1	0	1	1	0	1	0	0	1	0	1	1	0	0	1	1	1	1	0	1	1	1	1	1	0	1	0	1	0	0	1	1	0	1	1	1	1	1	0	1	0	1	0	0	0	0	0
0	1	0	1	0	1	1	0	1	0	0	1	0	1	1	0	0	0	1	1	1	0	0	1	1	1	1	0	1	1	1	0	0	0	0	0	1	1	1	1	1	0	1	0	1	0	0	1	0	0
0	1	0	0	0	0	1	0	1	0	0	0	0	1	1	0	0	0	1	0	0	0	1	0	1	0	0	0	0	1	1	0	0	1	0	0	1	1	1	1	0	0	0	1	1	0	0	1	0	0
1	0	0	1	0	0	0	0	1	0	0	1	0	1	1	0	1	1	1	0	0	0	1	1	1	1	0	0	1	0	0	0	0	1	1	0	1	1	1	1	1	0	0	1	1	0	0	0	0	0
1	1	1	1	0	0	1	0	0	0	0	1	0	1	1	0	0	1	1	1	1	0	0	1	1	1	1	0	1	0	1	0	0	0	1	0	1	1	1	1	1	0	1	0	1	0	0	0	0	0
0	1	0	0	0	1	1	0	1	0	0	0	0	1	1	0	0	0	1	1	1	0	1	0	1	0	1	0	0	1	1	0	0	1	0	0	1	1	1	1	0	0	1	0	1	0	0	1	0	0
Attractor	24
Type	:	cyclic
Ratio	:	0.00626
AKT	AP1	Apoptosis	ATF2	ATM	BCL2	CREB	DNA_damage	DUSP1	EGFR	EGFR_stimulus	ELK1	ERK	FGFR3	FGFR3_stimulus	FOS	FOXO3	FRS2	GAB1	GADD45	GRB2	Growth_Arrest	JNK	JUN	MAP3K1_3	MAX	MDM2	MEK1_2	MSK	MTK1	MYC	p14	p21	p38	p53	p70	PDK1	PI3K	PKC	PLCG	PPP2CA	Proliferation	PTEN	RAF	RAS	RSK	SMAD	SOS	SPRY	TAK1
0	0	0	0	0	1	0	0	1	0	1	0	0	1	1	0	0	0	1	0	1	0	0	0	1	0	1	0	0	1	0	0	0	0	0	0	1	1	1	1	0	0	0	0	1	0	0	1	0	0
1	0	0	0	0	0	0	0	0	0	1	0	0	1	1	0	0	0	1	0	0	0	1	0	1	0	0	1	0	0	0	0	0	1	0	0	1	1	1	1	0	0	0	1	1	0	0	1	0	0
1	0	0	1	0	0	0	0	0	0	1	1	1	1	1	0	0	1	1	0	0	0	1	1	1	1	1	1	1	0	0	0	0	1	1	0	1	1	1	1	1	0	0	0	1	0	0	0	0	0
1	1	0	1	0	0	1	0	0	0	1	1	1	1	1	0	0	1	1	1	1	0	1	1	1	1	1	0	1	0	1	0	0	1	0	1	1	1	1	1	1	0	1	0	1	1	0	0	1	0
0	1	0	1	0	1	1	0	1	0	1	1	0	1	1	1	0	0	1	0	1	0	1	1	1	1	1	0	1	1	1	0	0	1	0	1	1	1	1	1	1	1	0	0	1	1	0	0	1	0
1	1	0	1	0	0	1	0	1	0	1	1	0	1	1	0	1	0	1	0	0	0	1	1	1	1	0	0	1	0	1	0	0	1	0	0	1	1	1	1	1	1	0	1	1	0	0	0	0	0
1	1	0	1	0	1	1	0	1	0	1	1	0	1	1	0	0	1	1	0	0	0	0	1	1	1	1	0	1	0	1	0	0	0	1	0	1	1	1	1	1	0	0	0	1	0	0	0	0	0
1	1	0	0	0	1	1	0	1	0	1	0	0	1	1	0	0	1	1	1	1	0	0	0	1	0	1	0	0	0	1	0	0	0	0	0	1	1	1	1	0	0	1	0	1	0	0	0	0	0
Attractor	25
Type	:	cyclic
Ratio	:	0.04828
AKT	AP1	Apoptosis	ATF2	ATM	BCL2	CREB	DNA_damage	DUSP1	EGFR	EGFR_stimulus	ELK1	ERK	FGFR3	FGFR3_stimulus	FOS	FOXO3	FRS2	GAB1	GADD45	GRB2	Growth_Arrest	JNK	JUN	MAP3K1_3	MAX	MDM2	MEK1_2	MSK	MTK1	MYC	p14	p21	p38	p53	p70	PDK1	PI3K	PKC	PLCG	PPP2CA	Proliferation	PTEN	RAF	RAS	RSK	SMAD	SOS	SPRY	TAK1
0	1	0	1	0	0	1	0	1	0	0	1	0	1	0	0	1	0	1	1	1	0	1	1	1	1	0	0	1	1	1	0	0	1	0	0	1	1	1	1	1	0	0	1	1	0	1	1	0	1
1	1	0	1	0	0	1	0	1	0	0	1	0	1	0	0	1	0	1	1	1	0	1	1	1	1	0	0	1	1	1	0	0	1	1	0	1	1	1	1	1	0	0	1	1	0	1	1	0	1
1	1	1	1	0	1	1	0	1	0	0	1	0	1	0	0	0	0	1	1	1	0	1	1	1	1	1	0	1	1	1	0	0	1	1	0	1	1	1	1	1	0	1	0	1	0	1	1	0	1
0	1	0	1	0	1	1	0	1	0	0	1	0	1	0	0	0	0	1	1	1	0	1	1	1	1	1	0	1	1	1	0	0	1	0	0	1	1	1	1	1	0	1	0	1	0	1	1	0	1
Attractor	26
Type	:	cyclic
Ratio	:	0.01244
AKT	AP1	Apoptosis	ATF2	ATM	BCL2	CREB	DNA_damage	DUSP1	EGFR	EGFR_stimulus	ELK1	ERK	FGFR3	FGFR3_stimulus	FOS	FOXO3	FRS2	GAB1	GADD45	GRB2	Growth_Arrest	JNK	JUN	MAP3K1_3	MAX	MDM2	MEK1_2	MSK	MTK1	MYC	p14	p21	p38	p53	p70	PDK1	PI3K	PKC	PLCG	PPP2CA	Proliferation	PTEN	RAF	RAS	RSK	SMAD	SOS	SPRY	TAK1
0	1	0	1	0	1	1	0	1	0	0	1	0	1	1	0	0	0	1	1	1	0	1	1	1	1	1	0	1	1	1	0	0	1	0	0	1	1	1	1	1	0	0	0	1	0	1	1	0	1
1	1	0	1	0	0	1	0	1	0	0	1	0	1	1	0	1	0	1	1	1	0	1	1	1	1	0	0	1	1	1	0	0	1	0	0	1	1	1	1	1	0	0	1	1	0	1	1	0	1
1	1	0	1	0	1	1	0	1	0	0	1	0	1	1	0	0	0	1	1	1	0	1	1	1	1	1	0	1	1	1	0	0	1	1	0	1	1	1	1	1	0	0	0	1	0	1	1	0	1
1	1	0	1	0	1	1	0	1	0	0	1	0	1	1	0	0	0	1	1	1	0	1	1	1	1	1	0	1	1	1	0	0	1	0	0	1	1	1	1	1	0	1	0	1	0	1	1	0	1
Attractor	27
Type	:	cyclic
Ratio	:	0.00402
AKT	AP1	Apoptosis	ATF2	ATM	BCL2	CREB	DNA_damage	DUSP1	EGFR	EGFR_stimulus	ELK1	ERK	FGFR3	FGFR3_stimulus	FOS	FOXO3	FRS2	GAB1	GADD45	GRB2	Growth_Arrest	JNK	JUN	MAP3K1_3	MAX	MDM2	MEK1_2	MSK	MTK1	MYC	p14	p21	p38	p53	p70	PDK1	PI3K	PKC	PLCG	PPP2CA	Proliferation	PTEN	RAF	RAS	RSK	SMAD	SOS	SPRY	TAK1
0	0	0	1	0	0	0	0	1	0	0	1	0	1	1	0	1	1	1	0	0	0	1	1	1	1	0	0	1	1	0	0	0	1	0	0	1	1	1	1	1	0	0	1	1	0	0	0	0	0
1	1	0	1	0	0	1	0	0	0	0	1	0	1	1	0	1	1	1	0	1	0	1	1	1	1	0	0	1	0	1	0	0	1	1	0	1	1	1	1	1	0	0	1	1	0	0	0	0	0
1	1	1	1	0	1	1	0	1	0	0	1	0	1	1	0	0	0	1	1	1	0	1	1	1	1	1	0	1	0	1	0	0	1	1	0	1	1	1	1	1	0	1	0	1	0	0	1	0	0
0	1	0	1	0	1	1	0	1	0	0	1	0	1	1	0	0	0	1	1	0	0	0	1	1	1	1	0	1	1	1	0	0	0	0	0	1	1	1	1	1	0	1	0	1	0	0	1	0	0
0	1	0	0	0	0	1	0	1	0	0	0	0	1	1	0	0	1	1	0	0	0	1	0	1	0	0	0	0	1	1	0	0	1	0	0	1	1	1	1	0	0	0	1	1	0	0	0	0	0
1	0	0	1	0	0	0	0	1	0	0	1	0	1	1	0	1	1	1	0	1	0	1	1	1	1	0	0	1	0	0	0	0	1	1	0	1	1	1	1	1	0	0	1	1	0	0	0	0	0
1	1	1	1	0	0	1	0	0	0	0	1	0	1	1	0	0	0	1	1	1	0	0	1	1	1	1	0	1	0	1	0	0	0	1	0	1	1	1	1	1	0	1	0	1	0	0	1	0	0
0	1	0	0	0	1	1	0	1	0	0	0	0	1	1	0	0	0	1	1	0	0	1	0	1	0	1	0	0	1	1	0	0	1	0	0	1	1	1	1	0	0	1	0	1	0	0	1	0	0
Attractor	28
Type	:	cyclic
Ratio	:	0.0119
AKT	AP1	Apoptosis	ATF2	ATM	BCL2	CREB	DNA_damage	DUSP1	EGFR	EGFR_stimulus	ELK1	ERK	FGFR3	FGFR3_stimulus	FOS	FOXO3	FRS2	GAB1	GADD45	GRB2	Growth_Arrest	JNK	JUN	MAP3K1_3	MAX	MDM2	MEK1_2	MSK	MTK1	MYC	p14	p21	p38	p53	p70	PDK1	PI3K	PKC	PLCG	PPP2CA	Proliferation	PTEN	RAF	RAS	RSK	SMAD	SOS	SPRY	TAK1
0	0	0	0	0	0	0	0	1	0	1	0	0	1	1	0	0	0	1	0	1	0	1	0	1	0	0	0	0	1	0	0	0	1	0	0	1	1	1	1	0	0	0	1	1	0	0	1	0	0
1	0	0	1	0	0	0	0	0	0	1	1	0	1	1	0	1	0	1	0	0	0	1	1	1	1	0	1	1	0	0	0	0	1	1	0	1	1	1	1	1	0	0	1	1	0	0	1	0	0
1	1	1	1	0	0	1	0	0	0	1	1	1	1	1	0	0	1	1	1	0	0	1	1	1	1	1	0	1	0	1	0	0	1	1	0	1	1	1	1	1	0	1	0	1	0	0	0	0	0
0	1	0	1	0	1	1	0	1	0	1	1	0	1	1	0	0	1	1	1	1	0	1	1	1	1	1	0	1	1	1	0	0	1	0	1	1	1	1	1	1	0	1	0	1	1	0	0	1	0
0	1	0	1	0	0	1	0	1	0	1	1	0	1	1	0	1	0	1	0	1	0	1	1	1	1	0	0	1	1	1	0	0	1	0	0	1	1	1	1	1	1	0	1	1	0	0	0	0	0
1	1	0	1	0	0	1	0	1	0	1	1	0	1	1	0	1	0	1	0	0	0	1	1	1	1	0	0	1	0	1	0	0	1	1	0	1	1	1	1	1	0	0	1	1	0	0	1	0	0
1	1	1	1	0	1	1	0	1	0	1	1	0	1	1	0	0	1	1	1	0	0	0	1	1	1	1	0	1	0	1	0	0	0	1	0	1	1	1	1	1	0	1	0	1	0	0	0	0	0
0	1	0	0	0	1	1	0	1	0	1	0	0	1	1	0	0	1	1	1	1	0	0	0	1	0	1	0	0	1	1	0	0	0	0	0	1	1	1	1	0	0	1	0	1	0	0	0	0	0
Attractor	29
Type	:	cyclic
Ratio	:	0.0144
AKT	AP1	Apoptosis	ATF2	ATM	BCL2	CREB	DNA_damage	DUSP1	EGFR	EGFR_stimulus	ELK1	ERK	FGFR3	FGFR3_stimulus	FOS	FOXO3	FRS2	GAB1	GADD45	GRB2	Growth_Arrest	JNK	JUN	MAP3K1_3	MAX	MDM2	MEK1_2	MSK	MTK1	MYC	p14	p21	p38	p53	p70	PDK1	PI3K	PKC	PLCG	PPP2CA	Proliferation	PTEN	RAF	RAS	RSK	SMAD	SOS	SPRY	TAK1
0	0	0	0	0	0	0	0	1	0	1	0	0	1	0	0	0	0	1	0	0	0	1	0	1	0	0	0	0	1	0	0	0	1	0	0	1	1	1	1	0	0	0	1	1	0	0	1	0	0
1	0	0	1	0	0	0	0	0	0	1	1	0	1	0	0	1	1	1	0	0	0	1	1	1	1	0	1	1	0	0	0	0	1	1	0	1	1	1	1	1	0	0	1	1	0	0	0	0	0
1	1	1	1	0	0	1	0	0	0	1	1	1	1	0	0	0	1	1	1	1	0	1	1	1	1	1	0	1	0	1	0	0	1	1	0	1	1	1	1	1	0	1	0	1	0	0	0	0	0
0	1	0	1	0	1	1	0	1	0	1	1	0	1	0	0	0	0	1	1	1	0	1	1	1	1	1	0	1	1	1	0	0	1	0	1	1	1	1	1	1	0	1	0	1	1	0	1	1	0
0	1	0	1	0	0	1	0	1	0	1	1	0	1	0	0	1	0	1	0	0	0	1	1	1	1	0	0	1	1	1	0	0	1	0	0	1	1	1	1	1	1	0	1	1	0	0	0	0	0
1	1	0	1	0	0	1	0	1	0	1	1	0	1	0	0	1	1	1	0	0	0	1	1	1	1	0	0	1	0	1	0	0	1	1	0	1	1	1	1	1	0	0	1	1	0	0	0	0	0
1	1	1	1	0	1	1	0	1	0	1	1	0	1	0	0	0	1	1	1	1	0	0	1	1	1	1	0	1	0	1	0	0	0	1	0	1	1	1	1	1	0	1	0	1	0	0	0	0	0
0	1	0	0	0	1	1	0	1	0	1	0	0	1	0	0	0	0	1	1	1	0	0	0	1	0	1	0	0	1	1	0	0	0	0	0	1	1	1	1	0	0	1	0	1	0	0	1	0	0
Attractor	30
Type	:	cyclic
Ratio	:	0.00363
AKT	AP1	Apoptosis	ATF2	ATM	BCL2	CREB	DNA_damage	DUSP1	EGFR	EGFR_stimulus	ELK1	ERK	FGFR3	FGFR3_stimulus	FOS	FOXO3	FRS2	GAB1	GADD45	GRB2	Growth_Arrest	JNK	JUN	MAP3K1_3	MAX	MDM2	MEK1_2	MSK	MTK1	MYC	p14	p21	p38	p53	p70	PDK1	PI3K	PKC	PLCG	PPP2CA	Proliferation	PTEN	RAF	RAS	RSK	SMAD	SOS	SPRY	TAK1
0	0	0	0	0	1	0	0	1	0	1	0	0	1	0	0	0	0	1	0	0	0	1	0	1	0	1	0	0	1	0	0	0	1	0	0	1	1	1	1	0	0	0	0	1	0	0	1	0	0
1	0	0	1	0	0	0	0	0	0	1	1	0	1	0	0	1	1	1	0	0	0	1	1	1	1	0	1	1	0	0	0	0	1	0	0	1	1	1	1	1	0	0	1	1	0	0	0	0	0
1	1	0	1	0	0	1	0	0	0	1	1	1	1	0	0	0	1	1	0	1	0	1	1	1	1	1	0	1	0	1	0	0	1	1	0	1	1	1	1	1	0	0	0	1	0	0	0	0	0
1	1	0	1	0	1	1	0	1	0	1	1	0	1	0	0	0	0	1	1	1	0	1	1	1	1	1	0	1	0	1	0	0	1	0	1	1	1	1	1	1	0	1	0	1	1	0	1	1	0
0	1	0	1	0	1	1	0	1	0	1	1	0	1	0	0	0	0	1	0	0	0	0	1	1	1	1	0	1	1	1	0	0	0	0	0	1	1	1	1	1	1	0	0	1	0	0	0	0	0
1	1	0	0	0	0	1	0	1	0	1	0	0	1	0	0	0	1	1	0	0	0	1	0	1	0	0	0	0	0	1	0	0	1	0	0	1	1	1	1	0	0	0	1	1	0	0	0	0	0
1	0	0	1	0	1	0	0	1	0	1	1	0	1	0	0	0	1	1	0	1	0	0	1	1	1	1	0	1	0	0	0	0	0	1	0	1	1	1	1	1	0	0	0	1	0	0	0	0	0
1	1	0	0	0	0	1	0	0	0	1	0	0	1	0	0	0	0	1	1	1	0	0	0	1	0	1	0	0	0	1	0	0	0	0	0	1	1	1	1	0	0	1	0	1	0	0	1	0	0
Attractor	31
Type	:	cyclic
Ratio	:	0.00161
AKT	AP1	Apoptosis	ATF2	ATM	BCL2	CREB	DNA_damage	DUSP1	EGFR	EGFR_stimulus	ELK1	ERK	FGFR3	FGFR3_stimulus	FOS	FOXO3	FRS2	GAB1	GADD45	GRB2	Growth_Arrest	JNK	JUN	MAP3K1_3	MAX	MDM2	MEK1_2	MSK	MTK1	MYC	p14	p21	p38	p53	p70	PDK1	PI3K	PKC	PLCG	PPP2CA	Proliferation	PTEN	RAF	RAS	RSK	SMAD	SOS	SPRY	TAK1
0	0	0	1	0	1	0	0	1	0	1	1	0	1	1	0	0	1	1	0	1	0	1	1	1	1	1	0	1	1	0	0	0	1	0	1	1	1	1	1	1	0	0	0	1	1	0	0	1	0
1	1	0	1	0	0	1	0	0	0	1	1	0	1	1	0	1	0	1	0	1	0	1	1	1	1	0	0	1	0	1	0	0	1	0	0	1	1	1	1	1	0	0	1	1	0	0	0	0	0
1	1	0	1	0	1	1	0	1	0	1	1	0	1	1	0	0	0	1	0	0	0	1	1	1	1	1	0	1	0	1	0	0	1	1	0	1	1	1	1	1	0	0	0	1	0	0	1	0	0
1	1	0	1	0	1	1	0	1	0	1	1	0	1	1	0	0	1	1	1	0	0	0	1	1	1	1	0	1	0	1	0	0	0	0	0	1	1	1	1	1	0	1	0	1	0	0	0	0	0
0	1	0	0	0	1	1	0	1	0	1	0	0	1	1	0	0	1	1	0	1	0	0	0	1	0	1	0	0	1	1	0	0	0	0	0	1	1	1	1	0	0	0	0	1	0	0	0	0	0
1	0	0	0	0	0	0	0	1	0	1	0	0	1	1	0	0	0	1	0	1	0	1	0	1	0	0	0	0	0	0	0	0	1	0	0	1	1	1	1	0	0	0	1	1	0	0	1	0	0
1	0	0	1	0	0	0	0	0	0	1	1	0	1	1	0	0	0	1	0	0	0	0	1	1	1	1	1	1	0	0	0	0	0	1	0	1	1	1	1	1	0	0	0	1	0	0	1	0	0
1	1	0	0	0	0	1	0	0	0	1	0	1	1	1	0	0	1	1	1	0	0	1	0	1	0	1	0	0	0	1	0	0	1	0	0	1	1	1	1	0	0	1	0	1	0	0	0	0	0
Attractor	32
Type	:	cyclic
Ratio	:	0.00185
AKT	AP1	Apoptosis	ATF2	ATM	BCL2	CREB	DNA_damage	DUSP1	EGFR	EGFR_stimulus	ELK1	ERK	FGFR3	FGFR3_stimulus	FOS	FOXO3	FRS2	GAB1	GADD45	GRB2	Growth_Arrest	JNK	JUN	MAP3K1_3	MAX	MDM2	MEK1_2	MSK	MTK1	MYC	p14	p21	p38	p53	p70	PDK1	PI3K	PKC	PLCG	PPP2CA	Proliferation	PTEN	RAF	RAS	RSK	SMAD	SOS	SPRY	TAK1
0	0	0	1	0	1	0	0	1	0	1	1	0	1	0	0	0	1	1	0	1	0	1	1	1	1	1	0	1	1	0	0	0	1	0	1	1	1	1	1	1	0	0	0	1	1	0	0	1	0
1	1	0	1	0	0	1	0	0	0	1	1	0	1	0	0	1	0	1	0	1	0	1	1	1	1	0	0	1	0	1	0	0	1	0	0	1	1	1	1	1	0	0	1	1	0	0	0	0	0
1	1	0	1	0	1	1	0	1	0	1	1	0	1	0	0	0	0	1	0	0	0	1	1	1	1	1	0	1	0	1	0	0	1	1	0	1	1	1	1	1	0	0	0	1	0	0	1	0	0
1	1	0	1	0	1	1	0	1	0	1	1	0	1	0	0	0	1	1	1	0	0	0	1	1	1	1	0	1	0	1	0	0	0	0	0	1	1	1	1	1	0	1	0	1	0	0	0	0	0
0	1	0	0	0	1	1	0	1	0	1	0	0	1	0	0	0	1	1	0	1	0	0	0	1	0	1	0	0	1	1	0	0	0	0	0	1	1	1	1	0	0	0	0	1	0	0	0	0	0
1	0	0	0	0	0	0	0	1	0	1	0	0	1	0	0	0	0	1	0	1	0	1	0	1	0	0	0	0	0	0	0	0	1	0	0	1	1	1	1	0	0	0	1	1	0	0	1	0	0
1	0	0	1	0	0	0	0	0	0	1	1	0	1	0	0	0	0	1	0	0	0	0	1	1	1	1	1	1	0	0	0	0	0	1	0	1	1	1	1	1	0	0	0	1	0	0	1	0	0
1	1	0	0	0	0	1	0	0	0	1	0	1	1	0	0	0	1	1	1	0	0	1	0	1	0	1	0	0	0	1	0	0	1	0	0	1	1	1	1	0	0	1	0	1	0	0	0	0	0
Attractor	33
Type	:	cyclic
Ratio	:	0.06261
AKT	AP1	Apoptosis	ATF2	ATM	BCL2	CREB	DNA_damage	DUSP1	EGFR	EGFR_stimulus	ELK1	ERK	FGFR3	FGFR3_stimulus	FOS	FOXO3	FRS2	GAB1	GADD45	GRB2	Growth_Arrest	JNK	JUN	MAP3K1_3	MAX	MDM2	MEK1_2	MSK	MTK1	MYC	p14	p21	p38	p53	p70	PDK1	PI3K	PKC	PLCG	PPP2CA	Proliferation	PTEN	RAF	RAS	RSK	SMAD	SOS	SPRY	TAK1
0	1	1	1	1	0	1	1	1	0	0	1	0	1	1	0	1	0	1	1	0	1	1	1	1	1	1	0	1	1	1	0	1	1	1	0	1	1	1	1	1	0	1	1	1	0	0	1	0	0
0	1	1	1	1	0	1	1	1	0	0	1	0	1	1	0	1	1	1	1	0	1	1	1	1	1	1	0	1	1	1	0	1	1	1	0	1	1	1	1	1	0	1	1	1	0	0	0	0	0
0	1	1	1	1	0	1	1	1	0	0	1	0	1	1	0	1	1	1	1	1	1	1	1	1	1	1	0	1	1	1	0	1	1	1	0	1	1	1	1	1	0	1	1	1	0	0	0	0	0
0	1	1	1	1	0	1	1	1	0	0	1	0	1	1	0	1	0	1	1	1	1	1	1	1	1	1	0	1	1	1	0	1	1	1	0	1	1	1	1	1	0	1	1	1	0	0	1	0	0
Attractor	34
Type	:	cyclic
Ratio	:	0.00319
AKT	AP1	Apoptosis	ATF2	ATM	BCL2	CREB	DNA_damage	DUSP1	EGFR	EGFR_stimulus	ELK1	ERK	FGFR3	FGFR3_stimulus	FOS	FOXO3	FRS2	GAB1	GADD45	GRB2	Growth_Arrest	JNK	JUN	MAP3K1_3	MAX	MDM2	MEK1_2	MSK	MTK1	MYC	p14	p21	p38	p53	p70	PDK1	PI3K	PKC	PLCG	PPP2CA	Proliferation	PTEN	RAF	RAS	RSK	SMAD	SOS	SPRY	TAK1
0	0	0	1	0	0	0	0	1	0	1	1	0	1	1	0	1	1	1	0	1	0	1	1	1	1	0	0	1	1	0	0	0	1	0	0	1	1	1	1	1	0	0	1	1	0	0	0	0	0
1	1	0	1	0	0	1	0	0	0	1	1	0	1	1	0	1	0	1	0	1	0	1	1	1	1	0	0	1	0	1	0	0	1	1	0	1	1	1	1	1	0	0	1	1	0	0	1	0	0
1	1	1	1	0	1	1	0	1	0	1	1	0	1	1	0	0	0	1	1	0	0	1	1	1	1	1	0	1	0	1	0	0	1	1	0	1	1	1	1	1	0	1	0	1	0	0	1	0	0
0	1	0	1	0	1	1	0	1	0	1	1	0	1	1	0	0	1	1	1	0	0	0	1	1	1	1	0	1	1	1	0	0	0	0	0	1	1	1	1	1	0	1	0	1	0	0	0	0	0
0	1	0	0	0	0	1	0	1	0	1	0	0	1	1	0	0	1	1	0	1	0	1	0	1	0	0	0	0	1	1	0	0	1	0	0	1	1	1	1	0	0	0	1	1	0	0	0	0	0
1	0	0	1	0	0	0	0	1	0	1	1	0	1	1	0	1	0	1	0	1	0	1	1	1	1	0	0	1	0	0	0	0	1	1	0	1	1	1	1	1	0	0	1	1	0	0	1	0	0
1	1	1	1	0	0	1	0	0	0	1	1	0	1	1	0	0	0	1	1	0	0	0	1	1	1	1	0	1	0	1	0	0	0	1	0	1	1	1	1	1	0	1	0	1	0	0	1	0	0
0	1	0	0	0	1	1	0	1	0	1	0	0	1	1	0	0	1	1	1	0	0	1	0	1	0	1	0	0	1	1	0	0	1	0	0	1	1	1	1	0	0	1	0	1	0	0	0	0	0
Attractor	35
Type	:	cyclic
Ratio	:	0.00435
AKT	AP1	Apoptosis	ATF2	ATM	BCL2	CREB	DNA_damage	DUSP1	EGFR	EGFR_stimulus	ELK1	ERK	FGFR3	FGFR3_stimulus	FOS	FOXO3	FRS2	GAB1	GADD45	GRB2	Growth_Arrest	JNK	JUN	MAP3K1_3	MAX	MDM2	MEK1_2	MSK	MTK1	MYC	p14	p21	p38	p53	p70	PDK1	PI3K	PKC	PLCG	PPP2CA	Proliferation	PTEN	RAF	RAS	RSK	SMAD	SOS	SPRY	TAK1
0	0	0	1	0	0	0	0	1	0	1	1	0	1	1	0	1	1	1	0	0	0	1	1	1	1	0	0	1	1	0	0	0	1	0	0	1	1	1	1	1	0	0	1	1	0	0	0	0	0
1	1	0	1	0	0	1	0	0	0	1	1	0	1	1	0	1	1	1	0	1	0	1	1	1	1	0	0	1	0	1	0	0	1	1	0	1	1	1	1	1	0	0	1	1	0	0	0	0	0
1	1	1	1	0	1	1	0	1	0	1	1	0	1	1	0	0	0	1	1	1	0	1	1	1	1	1	0	1	0	1	0	0	1	1	0	1	1	1	1	1	0	1	0	1	0	0	1	0	0
0	1	0	1	0	1	1	0	1	0	1	1	0	1	1	0	0	0	1	1	0	0	0	1	1	1	1	0	1	1	1	0	0	0	0	0	1	1	1	1	1	0	1	0	1	0	0	1	0	0
0	1	0	0	0	0	1	0	1	0	1	0	0	1	1	0	0	1	1	0	0	0	1	0	1	0	0	0	0	1	1	0	0	1	0	0	1	1	1	1	0	0	0	1	1	0	0	0	0	0
1	0	0	1	0	0	0	0	1	0	1	1	0	1	1	0	1	1	1	0	1	0	1	1	1	1	0	0	1	0	0	0	0	1	1	0	1	1	1	1	1	0	0	1	1	0	0	0	0	0
1	1	1	1	0	0	1	0	0	0	1	1	0	1	1	0	0	0	1	1	1	0	0	1	1	1	1	0	1	0	1	0	0	0	1	0	1	1	1	1	1	0	1	0	1	0	0	1	0	0
0	1	0	0	0	1	1	0	1	0	1	0	0	1	1	0	0	0	1	1	0	0	1	0	1	0	1	0	0	1	1	0	0	1	0	0	1	1	1	1	0	0	1	0	1	0	0	1	0	0
Attractor	36
Type	:	cyclic
Ratio	:	0.01429
AKT	AP1	Apoptosis	ATF2	ATM	BCL2	CREB	DNA_damage	DUSP1	EGFR	EGFR_stimulus	ELK1	ERK	FGFR3	FGFR3_stimulus	FOS	FOXO3	FRS2	GAB1	GADD45	GRB2	Growth_Arrest	JNK	JUN	MAP3K1_3	MAX	MDM2	MEK1_2	MSK	MTK1	MYC	p14	p21	p38	p53	p70	PDK1	PI3K	PKC	PLCG	PPP2CA	Proliferation	PTEN	RAF	RAS	RSK	SMAD	SOS	SPRY	TAK1
0	0	0	0	0	0	0	0	1	0	1	0	0	1	1	0	0	0	1	0	0	0	1	0	1	0	0	0	0	1	0	0	0	1	0	0	1	1	1	1	0	0	0	1	1	0	0	1	0	0
1	0	0	1	0	0	0	0	0	0	1	1	0	1	1	0	1	1	1	0	0	0	1	1	1	1	0	1	1	0	0	0	0	1	1	0	1	1	1	1	1	0	0	1	1	0	0	0	0	0
1	1	1	1	0	0	1	0	0	0	1	1	1	1	1	0	0	1	1	1	1	0	1	1	1	1	1	0	1	0	1	0	0	1	1	0	1	1	1	1	1	0	1	0	1	0	0	0	0	0
0	1	0	1	0	1	1	0	1	0	1	1	0	1	1	0	0	0	1	1	1	0	1	1	1	1	1	0	1	1	1	0	0	1	0	1	1	1	1	1	1	0	1	0	1	1	0	1	1	0
0	1	0	1	0	0	1	0	1	0	1	1	0	1	1	0	1	0	1	0	0	0	1	1	1	1	0	0	1	1	1	0	0	1	0	0	1	1	1	1	1	1	0	1	1	0	0	0	0	0
1	1	0	1	0	0	1	0	1	0	1	1	0	1	1	0	1	1	1	0	0	0	1	1	1	1	0	0	1	0	1	0	0	1	1	0	1	1	1	1	1	0	0	1	1	0	0	0	0	0
1	1	1	1	0	1	1	0	1	0	1	1	0	1	1	0	0	1	1	1	1	0	0	1	1	1	1	0	1	0	1	0	0	0	1	0	1	1	1	1	1	0	1	0	1	0	0	0	0	0
0	1	0	0	0	1	1	0	1	0	1	0	0	1	1	0	0	0	1	1	1	0	0	0	1	0	1	0	0	1	1	0	0	0	0	0	1	1	1	1	0	0	1	0	1	0	0	1	0	0
Attractor	37
Type	:	cyclic
Ratio	:	0.00043
AKT	AP1	Apoptosis	ATF2	ATM	BCL2	CREB	DNA_damage	DUSP1	EGFR	EGFR_stimulus	ELK1	ERK	FGFR3	FGFR3_stimulus	FOS	FOXO3	FRS2	GAB1	GADD45	GRB2	Growth_Arrest	JNK	JUN	MAP3K1_3	MAX	MDM2	MEK1_2	MSK	MTK1	MYC	p14	p21	p38	p53	p70	PDK1	PI3K	PKC	PLCG	PPP2CA	Proliferation	PTEN	RAF	RAS	RSK	SMAD	SOS	SPRY	TAK1
0	0	0	1	0	1	0	0	1	0	1	1	0	1	0	0	0	0	1	0	1	0	0	1	1	1	1	0	1	1	0	0	0	0	0	0	1	1	1	1	1	0	0	0	1	0	0	1	0	0
1	1	0	0	0	0	1	0	0	0	1	0	0	1	0	0	0	0	1	0	0	0	1	0	1	0	0	0	0	0	1	0	0	1	0	0	1	1	1	1	0	0	0	1	1	0	0	1	0	0
1	0	0	1	0	1	0	0	1	0	1	1	0	1	0	0	0	1	1	0	0	0	1	1	1	1	1	0	1	0	0	0	0	1	1	0	1	1	1	1	1	0	0	0	1	0	0	0	0	0
1	1	0	1	0	0	1	0	0	0	1	1	0	1	0	0	0	1	1	1	1	0	0	1	1	1	1	0	1	0	1	0	0	0	0	0	1	1	1	1	1	0	1	0	1	0	0	0	0	0
0	1	0	0	0	1	1	0	1	0	1	0	0	1	0	0	0	0	1	0	1	0	1	0	1	0	1	0	0	1	1	0	0	1	0	0	1	1	1	1	0	0	0	0	1	0	0	1	0	0
1	0	0	1	0	0	0	0	1	0	1	1	0	1	0	0	1	0	1	0	0	0	1	1	1	1	0	0	1	0	0	0	0	1	0	0	1	1	1	1	1	0	0	1	1	0	0	1	0	0
1	1	0	1	0	0	1	0	0	0	1	1	0	1	0	0	0	1	1	0	0	0	0	1	1	1	1	0	1	0	1	0	0	0	1	0	1	1	1	1	1	0	0	0	1	0	0	0	0	0
1	1	0	0	0	1	1	0	1	0	1	0	0	1	0	0	0	1	1	1	1	0	1	0	1	0	1	0	0	0	1	0	0	1	0	0	1	1	1	1	0	0	1	0	1	0	0	0	0	0
Attractor	38
Type	:	cyclic
Ratio	:	0.01324
AKT	AP1	Apoptosis	ATF2	ATM	BCL2	CREB	DNA_damage	DUSP1	EGFR	EGFR_stimulus	ELK1	ERK	FGFR3	FGFR3_stimulus	FOS	FOXO3	FRS2	GAB1	GADD45	GRB2	Growth_Arrest	JNK	JUN	MAP3K1_3	MAX	MDM2	MEK1_2	MSK	MTK1	MYC	p14	p21	p38	p53	p70	PDK1	PI3K	PKC	PLCG	PPP2CA	Proliferation	PTEN	RAF	RAS	RSK	SMAD	SOS	SPRY	TAK1
0	1	0	1	0	1	1	0	1	0	1	1	0	1	0	0	0	0	1	1	1	0	1	1	1	1	1	0	1	1	1	0	0	1	0	0	1	1	1	1	1	0	0	0	1	0	1	1	0	1
1	1	0	1	0	0	1	0	1	0	1	1	0	1	0	0	1	0	1	1	1	0	1	1	1	1	0	0	1	1	1	0	0	1	0	0	1	1	1	1	1	0	0	1	1	0	1	1	0	1
1	1	0	1	0	1	1	0	1	0	1	1	0	1	0	0	0	0	1	1	1	0	1	1	1	1	1	0	1	1	1	0	0	1	1	0	1	1	1	1	1	0	0	0	1	0	1	1	0	1
1	1	0	1	0	1	1	0	1	0	1	1	0	1	0	0	0	0	1	1	1	0	1	1	1	1	1	0	1	1	1	0	0	1	0	0	1	1	1	1	1	0	1	0	1	0	1	1	0	1
Attractor	39
Type	:	cyclic
Ratio	:	0.00371
AKT	AP1	Apoptosis	ATF2	ATM	BCL2	CREB	DNA_damage	DUSP1	EGFR	EGFR_stimulus	ELK1	ERK	FGFR3	FGFR3_stimulus	FOS	FOXO3	FRS2	GAB1	GADD45	GRB2	Growth_Arrest	JNK	JUN	MAP3K1_3	MAX	MDM2	MEK1_2	MSK	MTK1	MYC	p14	p21	p38	p53	p70	PDK1	PI3K	PKC	PLCG	PPP2CA	Proliferation	PTEN	RAF	RAS	RSK	SMAD	SOS	SPRY	TAK1
0	0	0	0	0	1	0	0	1	0	0	0	0	1	0	0	0	0	1	0	1	0	1	0	1	0	1	0	0	1	0	0	0	1	0	0	1	1	1	1	0	0	0	0	1	0	0	1	0	0
1	0	0	1	0	0	0	0	0	0	0	1	0	1	0	0	1	0	1	0	0	0	1	1	1	1	0	1	1	0	0	0	0	1	0	0	1	1	1	1	1	0	0	1	1	0	0	1	0	0
1	1	0	1	0	0	1	0	0	0	0	1	1	1	0	0	0	1	1	0	0	0	1	1	1	1	1	0	1	0	1	0	0	1	1	0	1	1	1	1	1	0	0	0	1	0	0	0	0	0
1	1	0	1	0	1	1	0	1	0	0	1	0	1	0	0	0	1	1	1	1	0	1	1	1	1	1	0	1	0	1	0	0	1	0	1	1	1	1	1	1	0	1	0	1	1	0	0	1	0
0	1	0	1	0	1	1	0	1	0	0	1	0	1	0	0	0	0	1	0	1	0	0	1	1	1	1	0	1	1	1	0	0	0	0	0	1	1	1	1	1	1	0	0	1	0	0	0	0	0
1	1	0	0	0	0	1	0	1	0	0	0	0	1	0	0	0	0	1	0	0	0	1	0	1	0	0	0	0	0	1	0	0	1	0	0	1	1	1	1	0	0	0	1	1	0	0	1	0	0
1	0	0	1	0	1	0	0	1	0	0	1	0	1	0	0	0	1	1	0	0	0	0	1	1	1	1	0	1	0	0	0	0	0	1	0	1	1	1	1	1	0	0	0	1	0	0	0	0	0
1	1	0	0	0	0	1	0	0	0	0	0	0	1	0	0	0	1	1	1	1	0	0	0	1	0	1	0	0	0	1	0	0	0	0	0	1	1	1	1	0	0	1	0	1	0	0	0	0	0
Attractor	40
Type	:	cyclic
Ratio	:	0.00119
AKT	AP1	Apoptosis	ATF2	ATM	BCL2	CREB	DNA_damage	DUSP1	EGFR	EGFR_stimulus	ELK1	ERK	FGFR3	FGFR3_stimulus	FOS	FOXO3	FRS2	GAB1	GADD45	GRB2	Growth_Arrest	JNK	JUN	MAP3K1_3	MAX	MDM2	MEK1_2	MSK	MTK1	MYC	p14	p21	p38	p53	p70	PDK1	PI3K	PKC	PLCG	PPP2CA	Proliferation	PTEN	RAF	RAS	RSK	SMAD	SOS	SPRY	TAK1
0	0	0	1	0	1	0	0	1	0	1	1	0	1	1	0	0	1	1	0	0	0	0	1	1	1	1	0	1	1	0	0	0	0	0	0	1	1	1	1	1	0	0	0	1	0	0	0	0	0
1	1	0	0	0	0	1	0	0	0	1	0	0	1	1	0	0	1	1	0	1	0	1	0	1	0	0	0	0	0	1	0	0	1	0	0	1	1	1	1	0	0	0	1	1	0	0	0	0	0
1	0	0	1	0	1	0	0	1	0	1	1	0	1	1	0	0	0	1	0	1	0	1	1	1	1	1	0	1	0	0	0	0	1	1	0	1	1	1	1	1	0	0	0	1	0	0	1	0	0
1	1	0	1	0	0	1	0	0	0	1	1	0	1	1	0	0	0	1	1	0	0	0	1	1	1	1	0	1	0	1	0	0	0	0	0	1	1	1	1	1	0	1	0	1	0	0	1	0	0
0	1	0	0	0	1	1	0	1	0	1	0	0	1	1	0	0	1	1	0	0	0	1	0	1	0	1	0	0	1	1	0	0	1	0	0	1	1	1	1	0	0	0	0	1	0	0	0	0	0
1	0	0	1	0	0	0	0	1	0	1	1	0	1	1	0	1	1	1	0	1	0	1	1	1	1	0	0	1	0	0	0	0	1	0	0	1	1	1	1	1	0	0	1	1	0	0	0	0	0
1	1	0	1	0	0	1	0	0	0	1	1	0	1	1	0	0	0	1	0	1	0	0	1	1	1	1	0	1	0	1	0	0	0	1	0	1	1	1	1	1	0	0	0	1	0	0	1	0	0
1	1	0	0	0	1	1	0	1	0	1	0	0	1	1	0	0	0	1	1	0	0	1	0	1	0	1	0	0	0	1	0	0	1	0	0	1	1	1	1	0	0	1	0	1	0	0	1	0	0
Attractor	41
Type	:	cyclic
Ratio	:	0.00287
AKT	AP1	Apoptosis	ATF2	ATM	BCL2	CREB	DNA_damage	DUSP1	EGFR	EGFR_stimulus	ELK1	ERK	FGFR3	FGFR3_stimulus	FOS	FOXO3	FRS2	GAB1	GADD45	GRB2	Growth_Arrest	JNK	JUN	MAP3K1_3	MAX	MDM2	MEK1_2	MSK	MTK1	MYC	p14	p21	p38	p53	p70	PDK1	PI3K	PKC	PLCG	PPP2CA	Proliferation	PTEN	RAF	RAS	RSK	SMAD	SOS	SPRY	TAK1
0	0	0	1	0	0	0	0	1	0	1	1	0	1	0	0	1	0	1	0	1	0	1	1	1	1	0	0	1	1	0	0	0	1	0	0	1	1	1	1	1	0	0	1	1	0	0	1	0	0
1	1	0	1	0	0	1	0	0	0	1	1	0	1	0	0	1	0	1	0	0	0	1	1	1	1	0	0	1	0	1	0	0	1	1	0	1	1	1	1	1	0	0	1	1	0	0	1	0	0
1	1	1	1	0	1	1	0	1	0	1	1	0	1	0	0	0	1	1	1	0	0	1	1	1	1	1	0	1	0	1	0	0	1	1	0	1	1	1	1	1	0	1	0	1	0	0	0	0	0
0	1	0	1	0	1	1	0	1	0	1	1	0	1	0	0	0	1	1	1	1	0	0	1	1	1	1	0	1	1	1	0	0	0	0	0	1	1	1	1	1	0	1	0	1	0	0	0	0	0
0	1	0	0	0	0	1	0	1	0	1	0	0	1	0	0	0	0	1	0	1	0	1	0	1	0	0	0	0	1	1	0	0	1	0	0	1	1	1	1	0	0	0	1	1	0	0	1	0	0
1	0	0	1	0	0	0	0	1	0	1	1	0	1	0	0	1	0	1	0	0	0	1	1	1	1	0	0	1	0	0	0	0	1	1	0	1	1	1	1	1	0	0	1	1	0	0	1	0	0
1	1	1	1	0	0	1	0	0	0	1	1	0	1	0	0	0	1	1	1	0	0	0	1	1	1	1	0	1	0	1	0	0	0	1	0	1	1	1	1	1	0	1	0	1	0	0	0	0	0
0	1	0	0	0	1	1	0	1	0	1	0	0	1	0	0	0	1	1	1	1	0	1	0	1	0	1	0	0	1	1	0	0	1	0	0	1	1	1	1	0	0	1	0	1	0	0	0	0	0
Attractor	42
Type	:	cyclic
Ratio	:	0.01392
AKT	AP1	Apoptosis	ATF2	ATM	BCL2	CREB	DNA_damage	DUSP1	EGFR	EGFR_stimulus	ELK1	ERK	FGFR3	FGFR3_stimulus	FOS	FOXO3	FRS2	GAB1	GADD45	GRB2	Growth_Arrest	JNK	JUN	MAP3K1_3	MAX	MDM2	MEK1_2	MSK	MTK1	MYC	p14	p21	p38	p53	p70	PDK1	PI3K	PKC	PLCG	PPP2CA	Proliferation	PTEN	RAF	RAS	RSK	SMAD	SOS	SPRY	TAK1
0	0	0	0	0	0	0	0	1	0	0	0	0	1	1	0	0	0	1	0	0	0	1	0	1	0	0	0	0	1	0	0	0	1	0	0	1	1	1	1	0	0	0	1	1	0	0	1	0	0
1	0	0	1	0	0	0	0	0	0	0	1	0	1	1	0	1	1	1	0	0	0	1	1	1	1	0	1	1	0	0	0	0	1	1	0	1	1	1	1	1	0	0	1	1	0	0	0	0	0
1	1	1	1	0	0	1	0	0	0	0	1	1	1	1	0	0	1	1	1	1	0	1	1	1	1	1	0	1	0	1	0	0	1	1	0	1	1	1	1	1	0	1	0	1	0	0	0	0	0
0	1	0	1	0	1	1	0	1	0	0	1	0	1	1	0	0	0	1	1	1	0	1	1	1	1	1	0	1	1	1	0	0	1	0	1	1	1	1	1	1	0	1	0	1	1	0	1	1	0
0	1	0	1	0	0	1	0	1	0	0	1	0	1	1	0	1	0	1	0	0	0	1	1	1	1	0	0	1	1	1	0	0	1	0	0	1	1	1	1	1	1	0	1	1	0	0	0	0	0
1	1	0	1	0	0	1	0	1	0	0	1	0	1	1	0	1	1	1	0	0	0	1	1	1	1	0	0	1	0	1	0	0	1	1	0	1	1	1	1	1	0	0	1	1	0	0	0	0	0
1	1	1	1	0	1	1	0	1	0	0	1	0	1	1	0	0	1	1	1	1	0	0	1	1	1	1	0	1	0	1	0	0	0	1	0	1	1	1	1	1	0	1	0	1	0	0	0	0	0
0	1	0	0	0	1	1	0	1	0	0	0	0	1	1	0	0	0	1	1	1	0	0	0	1	0	1	0	0	1	1	0	0	0	0	0	1	1	1	1	0	0	1	0	1	0	0	1	0	0
Attractor	43
Type	:	cyclic
Ratio	:	0.00351
AKT	AP1	Apoptosis	ATF2	ATM	BCL2	CREB	DNA_damage	DUSP1	EGFR	EGFR_stimulus	ELK1	ERK	FGFR3	FGFR3_stimulus	FOS	FOXO3	FRS2	GAB1	GADD45	GRB2	Growth_Arrest	JNK	JUN	MAP3K1_3	MAX	MDM2	MEK1_2	MSK	MTK1	MYC	p14	p21	p38	p53	p70	PDK1	PI3K	PKC	PLCG	PPP2CA	Proliferation	PTEN	RAF	RAS	RSK	SMAD	SOS	SPRY	TAK1
0	0	0	1	0	0	0	0	1	0	1	1	0	1	0	0	1	0	1	0	0	0	1	1	1	1	0	0	1	1	0	0	0	1	0	0	1	1	1	1	1	0	0	1	1	0	0	1	0	0
1	1	0	1	0	0	1	0	0	0	1	1	0	1	0	0	1	1	1	0	0	0	1	1	1	1	0	0	1	0	1	0	0	1	1	0	1	1	1	1	1	0	0	1	1	0	0	0	0	0
1	1	1	1	0	1	1	0	1	0	1	1	0	1	0	0	0	1	1	1	1	0	1	1	1	1	1	0	1	0	1	0	0	1	1	0	1	1	1	1	1	0	1	0	1	0	0	0	0	0
0	1	0	1	0	1	1	0	1	0	1	1	0	1	0	0	0	0	1	1	1	0	0	1	1	1	1	0	1	1	1	0	0	0	0	0	1	1	1	1	1	0	1	0	1	0	0	1	0	0
0	1	0	0	0	0	1	0	1	0	1	0	0	1	0	0	0	0	1	0	0	0	1	0	1	0	0	0	0	1	1	0	0	1	0	0	1	1	1	1	0	0	0	1	1	0	0	1	0	0
1	0	0	1	0	0	0	0	1	0	1	1	0	1	0	0	1	1	1	0	0	0	1	1	1	1	0	0	1	0	0	0	0	1	1	0	1	1	1	1	1	0	0	1	1	0	0	0	0	0
1	1	1	1	0	0	1	0	0	0	1	1	0	1	0	0	0	1	1	1	1	0	0	1	1	1	1	0	1	0	1	0	0	0	1	0	1	1	1	1	1	0	1	0	1	0	0	0	0	0
0	1	0	0	0	1	1	0	1	0	1	0	0	1	0	0	0	0	1	1	1	0	1	0	1	0	1	0	0	1	1	0	0	1	0	0	1	1	1	1	0	0	1	0	1	0	0	1	0	0
Attractor	44
Type	:	cyclic
Ratio	:	0.00126
AKT	AP1	Apoptosis	ATF2	ATM	BCL2	CREB	DNA_damage	DUSP1	EGFR	EGFR_stimulus	ELK1	ERK	FGFR3	FGFR3_stimulus	FOS	FOXO3	FRS2	GAB1	GADD45	GRB2	Growth_Arrest	JNK	JUN	MAP3K1_3	MAX	MDM2	MEK1_2	MSK	MTK1	MYC	p14	p21	p38	p53	p70	PDK1	PI3K	PKC	PLCG	PPP2CA	Proliferation	PTEN	RAF	RAS	RSK	SMAD	SOS	SPRY	TAK1
0	0	0	1	0	1	0	0	1	0	0	1	0	1	0	0	0	1	1	0	1	0	0	1	1	1	1	0	1	1	0	0	0	0	0	0	1	1	1	1	1	0	0	0	1	0	0	0	0	0
1	1	0	0	0	0	1	0	0	0	0	0	0	1	0	0	0	0	1	0	1	0	1	0	1	0	0	0	0	0	1	0	0	1	0	0	1	1	1	1	0	0	0	1	1	0	0	1	0	0
1	0	0	1	0	1	0	0	1	0	0	1	0	1	0	0	0	0	1	0	0	0	1	1	1	1	1	0	1	0	0	0	0	1	1	0	1	1	1	1	1	0	0	0	1	0	0	1	0	0
1	1	0	1	0	0	1	0	0	0	0	1	0	1	0	0	0	1	1	1	0	0	0	1	1	1	1	0	1	0	1	0	0	0	0	0	1	1	1	1	1	0	1	0	1	0	0	0	0	0
0	1	0	0	0	1	1	0	1	0	0	0	0	1	0	0	0	1	1	0	1	0	1	0	1	0	1	0	0	1	1	0	0	1	0	0	1	1	1	1	0	0	0	0	1	0	0	0	0	0
1	0	0	1	0	0	0	0	1	0	0	1	0	1	0	0	1	0	1	0	1	0	1	1	1	1	0	0	1	0	0	0	0	1	0	0	1	1	1	1	1	0	0	1	1	0	0	1	0	0
1	1	0	1	0	0	1	0	0	0	0	1	0	1	0	0	0	0	1	0	0	0	0	1	1	1	1	0	1	0	1	0	0	0	1	0	1	1	1	1	1	0	0	0	1	0	0	1	0	0
1	1	0	0	0	1	1	0	1	0	0	0	0	1	0	0	0	1	1	1	0	0	1	0	1	0	1	0	0	0	1	0	0	1	0	0	1	1	1	1	0	0	1	0	1	0	0	0	0	0
Attractor	45
Type	:	cyclic
Ratio	:	0.00347
AKT	AP1	Apoptosis	ATF2	ATM	BCL2	CREB	DNA_damage	DUSP1	EGFR	EGFR_stimulus	ELK1	ERK	FGFR3	FGFR3_stimulus	FOS	FOXO3	FRS2	GAB1	GADD45	GRB2	Growth_Arrest	JNK	JUN	MAP3K1_3	MAX	MDM2	MEK1_2	MSK	MTK1	MYC	p14	p21	p38	p53	p70	PDK1	PI3K	PKC	PLCG	PPP2CA	Proliferation	PTEN	RAF	RAS	RSK	SMAD	SOS	SPRY	TAK1
0	0	0	0	0	1	0	0	1	0	1	0	0	1	1	0	0	0	1	0	0	0	1	0	1	0	1	0	0	1	0	0	0	1	0	0	1	1	1	1	0	0	0	0	1	0	0	1	0	0
1	0	0	1	0	0	0	0	0	0	1	1	0	1	1	0	1	1	1	0	0	0	1	1	1	1	0	1	1	0	0	0	0	1	0	0	1	1	1	1	1	0	0	1	1	0	0	0	0	0
1	1	0	1	0	0	1	0	0	0	1	1	1	1	1	0	0	1	1	0	1	0	1	1	1	1	1	0	1	0	1	0	0	1	1	0	1	1	1	1	1	0	0	0	1	0	0	0	0	0
1	1	0	1	0	1	1	0	1	0	1	1	0	1	1	0	0	0	1	1	1	0	1	1	1	1	1	0	1	0	1	0	0	1	0	1	1	1	1	1	1	0	1	0	1	1	0	1	1	0
0	1	0	1	0	1	1	0	1	0	1	1	0	1	1	0	0	0	1	0	0	0	0	1	1	1	1	0	1	1	1	0	0	0	0	0	1	1	1	1	1	1	0	0	1	0	0	0	0	0
1	1	0	0	0	0	1	0	1	0	1	0	0	1	1	0	0	1	1	0	0	0	1	0	1	0	0	0	0	0	1	0	0	1	0	0	1	1	1	1	0	0	0	1	1	0	0	0	0	0
1	0	0	1	0	1	0	0	1	0	1	1	0	1	1	0	0	1	1	0	1	0	0	1	1	1	1	0	1	0	0	0	0	0	1	0	1	1	1	1	1	0	0	0	1	0	0	0	0	0
1	1	0	0	0	0	1	0	0	0	1	0	0	1	1	0	0	0	1	1	1	0	0	0	1	0	1	0	0	0	1	0	0	0	0	0	1	1	1	1	0	0	1	0	1	0	0	1	0	0
Attractor	46
Type	:	cyclic
Ratio	:	0.00166
AKT	AP1	Apoptosis	ATF2	ATM	BCL2	CREB	DNA_damage	DUSP1	EGFR	EGFR_stimulus	ELK1	ERK	FGFR3	FGFR3_stimulus	FOS	FOXO3	FRS2	GAB1	GADD45	GRB2	Growth_Arrest	JNK	JUN	MAP3K1_3	MAX	MDM2	MEK1_2	MSK	MTK1	MYC	p14	p21	p38	p53	p70	PDK1	PI3K	PKC	PLCG	PPP2CA	Proliferation	PTEN	RAF	RAS	RSK	SMAD	SOS	SPRY	TAK1
1	0	0	0	0	0	0	0	0	0	1	0	0	1	0	0	0	0	1	0	1	0	0	0	1	0	1	1	0	0	0	0	0	0	0	0	1	1	1	1	0	0	0	0	1	0	0	1	0	0
1	0	0	0	0	0	0	0	0	0	1	0	1	1	0	0	0	0	1	0	0	0	1	0	1	0	1	1	0	0	0	0	0	1	0	0	1	1	1	1	0	0	0	0	1	0	0	1	0	0
1	0	0	1	0	0	0	0	0	0	1	1	1	1	0	0	0	1	1	0	0	0	1	1	1	1	1	1	1	0	0	0	0	1	0	1	1	1	1	1	1	0	0	0	1	1	0	0	1	0
1	1	0	1	0	0	1	0	0	0	1	1	1	1	0	1	0	0	1	0	1	0	1	1	1	1	1	0	1	0	1	0	0	1	0	1	1	1	1	1	1	0	0	0	1	1	0	0	1	0
1	1	0	1	0	1	1	0	1	0	1	1	0	1	0	1	0	0	1	0	0	0	1	1	1	1	1	0	1	0	1	0	0	1	0	1	1	1	1	1	1	1	0	0	1	1	0	0	1	0
1	1	0	1	0	1	1	0	1	0	1	1	0	1	0	0	0	0	1	0	0	0	0	1	1	1	1	0	1	0	1	0	0	0	0	0	1	1	1	1	1	1	0	0	1	0	0	0	0	0
1	1	0	0	0	1	1	0	1	0	1	0	0	1	0	0	0	1	1	0	0	0	0	0	1	0	1	0	0	0	1	0	0	0	0	0	1	1	1	1	0	0	0	0	1	0	0	0	0	0
1	0	0	0	0	1	0	0	1	0	1	0	0	1	0	0	0	1	1	0	1	0	0	0	1	0	1	0	0	0	0	0	0	0	0	0	1	1	1	1	0	0	0	0	1	0	0	0	0	0
Attractor	47
Type	:	cyclic
Ratio	:	0.00419
AKT	AP1	Apoptosis	ATF2	ATM	BCL2	CREB	DNA_damage	DUSP1	EGFR	EGFR_stimulus	ELK1	ERK	FGFR3	FGFR3_stimulus	FOS	FOXO3	FRS2	GAB1	GADD45	GRB2	Growth_Arrest	JNK	JUN	MAP3K1_3	MAX	MDM2	MEK1_2	MSK	MTK1	MYC	p14	p21	p38	p53	p70	PDK1	PI3K	PKC	PLCG	PPP2CA	Proliferation	PTEN	RAF	RAS	RSK	SMAD	SOS	SPRY	TAK1
0	0	0	1	0	0	0	0	1	0	1	1	0	1	0	0	1	1	1	0	0	0	1	1	1	1	0	0	1	1	0	0	0	1	0	0	1	1	1	1	1	0	0	1	1	0	0	0	0	0
1	1	0	1	0	0	1	0	0	0	1	1	0	1	0	0	1	1	1	0	1	0	1	1	1	1	0	0	1	0	1	0	0	1	1	0	1	1	1	1	1	0	0	1	1	0	0	0	0	0
1	1	1	1	0	1	1	0	1	0	1	1	0	1	0	0	0	0	1	1	1	0	1	1	1	1	1	0	1	0	1	0	0	1	1	0	1	1	1	1	1	0	1	0	1	0	0	1	0	0
0	1	0	1	0	1	1	0	1	0	1	1	0	1	0	0	0	0	1	1	0	0	0	1	1	1	1	0	1	1	1	0	0	0	0	0	1	1	1	1	1	0	1	0	1	0	0	1	0	0
0	1	0	0	0	0	1	0	1	0	1	0	0	1	0	0	0	1	1	0	0	0	1	0	1	0	0	0	0	1	1	0	0	1	0	0	1	1	1	1	0	0	0	1	1	0	0	0	0	0
1	0	0	1	0	0	0	0	1	0	1	1	0	1	0	0	1	1	1	0	1	0	1	1	1	1	0	0	1	0	0	0	0	1	1	0	1	1	1	1	1	0	0	1	1	0	0	0	0	0
1	1	1	1	0	0	1	0	0	0	1	1	0	1	0	0	0	0	1	1	1	0	0	1	1	1	1	0	1	0	1	0	0	0	1	0	1	1	1	1	1	0	1	0	1	0	0	1	0	0
0	1	0	0	0	1	1	0	1	0	1	0	0	1	0	0	0	0	1	1	0	0	1	0	1	0	1	0	0	1	1	0	0	1	0	0	1	1	1	1	0	0	1	0	1	0	0	1	0	0
Attractor	48
Type	:	cyclic
Ratio	:	0.00331
AKT	AP1	Apoptosis	ATF2	ATM	BCL2	CREB	DNA_damage	DUSP1	EGFR	EGFR_stimulus	ELK1	ERK	FGFR3	FGFR3_stimulus	FOS	FOXO3	FRS2	GAB1	GADD45	GRB2	Growth_Arrest	JNK	JUN	MAP3K1_3	MAX	MDM2	MEK1_2	MSK	MTK1	MYC	p14	p21	p38	p53	p70	PDK1	PI3K	PKC	PLCG	PPP2CA	Proliferation	PTEN	RAF	RAS	RSK	SMAD	SOS	SPRY	TAK1
0	0	0	1	0	0	0	0	1	0	0	1	0	1	0	0	1	0	1	0	1	0	1	1	1	1	0	0	1	1	0	0	0	1	0	0	1	1	1	1	1	0	0	1	1	0	0	1	0	0
1	1	0	1	0	0	1	0	0	0	0	1	0	1	0	0	1	0	1	0	0	0	1	1	1	1	0	0	1	0	1	0	0	1	1	0	1	1	1	1	1	0	0	1	1	0	0	1	0	0
1	1	1	1	0	1	1	0	1	0	0	1	0	1	0	0	0	1	1	1	0	0	1	1	1	1	1	0	1	0	1	0	0	1	1	0	1	1	1	1	1	0	1	0	1	0	0	0	0	0
0	1	0	1	0	1	1	0	1	0	0	1	0	1	0	0	0	1	1	1	1	0	0	1	1	1	1	0	1	1	1	0	0	0	0	0	1	1	1	1	1	0	1	0	1	0	0	0	0	0
0	1	0	0	0	0	1	0	1	0	0	0	0	1	0	0	0	0	1	0	1	0	1	0	1	0	0	0	0	1	1	0	0	1	0	0	1	1	1	1	0	0	0	1	1	0	0	1	0	0
1	0	0	1	0	0	0	0	1	0	0	1	0	1	0	0	1	0	1	0	0	0	1	1	1	1	0	0	1	0	0	0	0	1	1	0	1	1	1	1	1	0	0	1	1	0	0	1	0	0
1	1	1	1	0	0	1	0	0	0	0	1	0	1	0	0	0	1	1	1	0	0	0	1	1	1	1	0	1	0	1	0	0	0	1	0	1	1	1	1	1	0	1	0	1	0	0	0	0	0
0	1	0	0	0	1	1	0	1	0	0	0	0	1	0	0	0	1	1	1	1	0	1	0	1	0	1	0	0	1	1	0	0	1	0	0	1	1	1	1	0	0	1	0	1	0	0	0	0	0
Attractor	49
Type	:	cyclic
Ratio	:	0.0116
AKT	AP1	Apoptosis	ATF2	ATM	BCL2	CREB	DNA_damage	DUSP1	EGFR	EGFR_stimulus	ELK1	ERK	FGFR3	FGFR3_stimulus	FOS	FOXO3	FRS2	GAB1	GADD45	GRB2	Growth_Arrest	JNK	JUN	MAP3K1_3	MAX	MDM2	MEK1_2	MSK	MTK1	MYC	p14	p21	p38	p53	p70	PDK1	PI3K	PKC	PLCG	PPP2CA	Proliferation	PTEN	RAF	RAS	RSK	SMAD	SOS	SPRY	TAK1
0	0	0	0	0	0	0	0	1	0	0	0	0	1	0	0	0	0	1	0	1	0	1	0	1	0	0	0	0	1	0	0	0	1	0	0	1	1	1	1	0	0	0	1	1	0	0	1	0	0
1	0	0	1	0	0	0	0	0	0	0	1	0	1	0	0	1	0	1	0	0	0	1	1	1	1	0	1	1	0	0	0	0	1	1	0	1	1	1	1	1	0	0	1	1	0	0	1	0	0
1	1	1	1	0	0	1	0	0	0	0	1	1	1	0	0	0	1	1	1	0	0	1	1	1	1	1	0	1	0	1	0	0	1	1	0	1	1	1	1	1	0	1	0	1	0	0	0	0	0
0	1	0	1	0	1	1	0	1	0	0	1	0	1	0	0	0	1	1	1	1	0	1	1	1	1	1	0	1	1	1	0	0	1	0	1	1	1	1	1	1	0	1	0	1	1	0	0	1	0
0	1	0	1	0	0	1	0	1	0	0	1	0	1	0	0	1	0	1	0	1	0	1	1	1	1	0	0	1	1	1	0	0	1	0	0	1	1	1	1	1	1	0	1	1	0	0	0	0	0
1	1	0	1	0	0	1	0	1	0	0	1	0	1	0	0	1	0	1	0	0	0	1	1	1	1	0	0	1	0	1	0	0	1	1	0	1	1	1	1	1	0	0	1	1	0	0	1	0	0
1	1	1	1	0	1	1	0	1	0	0	1	0	1	0	0	0	1	1	1	0	0	0	1	1	1	1	0	1	0	1	0	0	0	1	0	1	1	1	1	1	0	1	0	1	0	0	0	0	0
0	1	0	0	0	1	1	0	1	0	0	0	0	1	0	0	0	1	1	1	1	0	0	0	1	0	1	0	0	1	1	0	0	0	0	0	1	1	1	1	0	0	1	0	1	0	0	0	0	0
Attractor	50
Type	:	cyclic
Ratio	:	0.0018
AKT	AP1	Apoptosis	ATF2	ATM	BCL2	CREB	DNA_damage	DUSP1	EGFR	EGFR_stimulus	ELK1	ERK	FGFR3	FGFR3_stimulus	FOS	FOXO3	FRS2	GAB1	GADD45	GRB2	Growth_Arrest	JNK	JUN	MAP3K1_3	MAX	MDM2	MEK1_2	MSK	MTK1	MYC	p14	p21	p38	p53	p70	PDK1	PI3K	PKC	PLCG	PPP2CA	Proliferation	PTEN	RAF	RAS	RSK	SMAD	SOS	SPRY	TAK1
0	0	0	1	0	1	0	0	1	0	0	1	0	1	1	0	0	0	1	0	1	0	1	1	1	1	1	0	1	1	0	0	0	1	0	1	1	1	1	1	1	0	0	0	1	1	0	1	1	0
1	1	0	1	0	0	1	0	0	0	0	1	0	1	1	0	1	0	1	0	0	0	1	1	1	1	0	0	1	0	1	0	0	1	0	0	1	1	1	1	1	0	0	1	1	0	0	0	0	0
1	1	0	1	0	1	1	0	1	0	0	1	0	1	1	0	0	1	1	0	0	0	1	1	1	1	1	0	1	0	1	0	0	1	1	0	1	1	1	1	1	0	0	0	1	0	0	0	0	0
1	1	0	1	0	1	1	0	1	0	0	1	0	1	1	0	0	1	1	1	1	0	0	1	1	1	1	0	1	0	1	0	0	0	0	0	1	1	1	1	1	0	1	0	1	0	0	0	0	0
0	1	0	0	0	1	1	0	1	0	0	0	0	1	1	0	0	0	1	0	1	0	0	0	1	0	1	0	0	1	1	0	0	0	0	0	1	1	1	1	0	0	0	0	1	0	0	1	0	0
1	0	0	0	0	0	0	0	1	0	0	0	0	1	1	0	0	0	1	0	0	0	1	0	1	0	0	0	0	0	0	0	0	1	0	0	1	1	1	1	0	0	0	1	1	0	0	1	0	0
1	0	0	1	0	0	0	0	0	0	0	1	0	1	1	0	0	1	1	0	0	0	0	1	1	1	1	1	1	0	0	0	0	0	1	0	1	1	1	1	1	0	0	0	1	0	0	0	0	0
1	1	0	0	0	0	1	0	0	0	0	0	1	1	1	0	0	1	1	1	1	0	1	0	1	0	1	0	0	0	1	0	0	1	0	0	1	1	1	1	0	0	1	0	1	0	0	0	0	0
Attractor	51
Type	:	cyclic
Ratio	:	0.00401
AKT	AP1	Apoptosis	ATF2	ATM	BCL2	CREB	DNA_damage	DUSP1	EGFR	EGFR_stimulus	ELK1	ERK	FGFR3	FGFR3_stimulus	FOS	FOXO3	FRS2	GAB1	GADD45	GRB2	Growth_Arrest	JNK	JUN	MAP3K1_3	MAX	MDM2	MEK1_2	MSK	MTK1	MYC	p14	p21	p38	p53	p70	PDK1	PI3K	PKC	PLCG	PPP2CA	Proliferation	PTEN	RAF	RAS	RSK	SMAD	SOS	SPRY	TAK1
0	0	0	1	0	0	0	0	1	0	0	1	0	1	0	0	1	1	1	0	0	0	1	1	1	1	0	0	1	1	0	0	0	1	0	0	1	1	1	1	1	0	0	1	1	0	0	0	0	0
1	1	0	1	0	0	1	0	0	0	0	1	0	1	0	0	1	1	1	0	1	0	1	1	1	1	0	0	1	0	1	0	0	1	1	0	1	1	1	1	1	0	0	1	1	0	0	0	0	0
1	1	1	1	0	1	1	0	1	0	0	1	0	1	0	0	0	0	1	1	1	0	1	1	1	1	1	0	1	0	1	0	0	1	1	0	1	1	1	1	1	0	1	0	1	0	0	1	0	0
0	1	0	1	0	1	1	0	1	0	0	1	0	1	0	0	0	0	1	1	0	0	0	1	1	1	1	0	1	1	1	0	0	0	0	0	1	1	1	1	1	0	1	0	1	0	0	1	0	0
0	1	0	0	0	0	1	0	1	0	0	0	0	1	0	0	0	1	1	0	0	0	1	0	1	0	0	0	0	1	1	0	0	1	0	0	1	1	1	1	0	0	0	1	1	0	0	0	0	0
1	0	0	1	0	0	0	0	1	0	0	1	0	1	0	0	1	1	1	0	1	0	1	1	1	1	0	0	1	0	0	0	0	1	1	0	1	1	1	1	1	0	0	1	1	0	0	0	0	0
1	1	1	1	0	0	1	0	0	0	0	1	0	1	0	0	0	0	1	1	1	0	0	1	1	1	1	0	1	0	1	0	0	0	1	0	1	1	1	1	1	0	1	0	1	0	0	1	0	0
0	1	0	0	0	1	1	0	1	0	0	0	0	1	0	0	0	0	1	1	0	0	1	0	1	0	1	0	0	1	1	0	0	1	0	0	1	1	1	1	0	0	1	0	1	0	0	1	0	0
Attractor	52
Type	:	cyclic
Ratio	:	0.00108
AKT	AP1	Apoptosis	ATF2	ATM	BCL2	CREB	DNA_damage	DUSP1	EGFR	EGFR_stimulus	ELK1	ERK	FGFR3	FGFR3_stimulus	FOS	FOXO3	FRS2	GAB1	GADD45	GRB2	Growth_Arrest	JNK	JUN	MAP3K1_3	MAX	MDM2	MEK1_2	MSK	MTK1	MYC	p14	p21	p38	p53	p70	PDK1	PI3K	PKC	PLCG	PPP2CA	Proliferation	PTEN	RAF	RAS	RSK	SMAD	SOS	SPRY	TAK1
0	0	0	1	0	1	0	0	1	0	0	1	0	1	0	0	0	1	1	0	0	0	0	1	1	1	1	0	1	1	0	0	0	0	0	0	1	1	1	1	1	0	0	0	1	0	0	0	0	0
1	1	0	0	0	0	1	0	0	0	0	0	0	1	0	0	0	1	1	0	1	0	1	0	1	0	0	0	0	0	1	0	0	1	0	0	1	1	1	1	0	0	0	1	1	0	0	0	0	0
1	0	0	1	0	1	0	0	1	0	0	1	0	1	0	0	0	0	1	0	1	0	1	1	1	1	1	0	1	0	0	0	0	1	1	0	1	1	1	1	1	0	0	0	1	0	0	1	0	0
1	1	0	1	0	0	1	0	0	0	0	1	0	1	0	0	0	0	1	1	0	0	0	1	1	1	1	0	1	0	1	0	0	0	0	0	1	1	1	1	1	0	1	0	1	0	0	1	0	0
0	1	0	0	0	1	1	0	1	0	0	0	0	1	0	0	0	1	1	0	0	0	1	0	1	0	1	0	0	1	1	0	0	1	0	0	1	1	1	1	0	0	0	0	1	0	0	0	0	0
1	0	0	1	0	0	0	0	1	0	0	1	0	1	0	0	1	1	1	0	1	0	1	1	1	1	0	0	1	0	0	0	0	1	0	0	1	1	1	1	1	0	0	1	1	0	0	0	0	0
1	1	0	1	0	0	1	0	0	0	0	1	0	1	0	0	0	0	1	0	1	0	0	1	1	1	1	0	1	0	1	0	0	0	1	0	1	1	1	1	1	0	0	0	1	0	0	1	0	0
1	1	0	0	0	1	1	0	1	0	0	0	0	1	0	0	0	0	1	1	0	0	1	0	1	0	1	0	0	0	1	0	0	1	0	0	1	1	1	1	0	0	1	0	1	0	0	1	0	0
Attractor	53
Type	:	cyclic
Ratio	:	0.00114
AKT	AP1	Apoptosis	ATF2	ATM	BCL2	CREB	DNA_damage	DUSP1	EGFR	EGFR_stimulus	ELK1	ERK	FGFR3	FGFR3_stimulus	FOS	FOXO3	FRS2	GAB1	GADD45	GRB2	Growth_Arrest	JNK	JUN	MAP3K1_3	MAX	MDM2	MEK1_2	MSK	MTK1	MYC	p14	p21	p38	p53	p70	PDK1	PI3K	PKC	PLCG	PPP2CA	Proliferation	PTEN	RAF	RAS	RSK	SMAD	SOS	SPRY	TAK1
0	0	0	1	0	1	0	0	1	0	1	1	0	1	0	0	0	1	1	0	1	0	0	1	1	1	1	0	1	1	0	0	0	0	0	0	1	1	1	1	1	0	0	0	1	0	0	0	0	0
1	1	0	0	0	0	1	0	0	0	1	0	0	1	0	0	0	0	1	0	1	0	1	0	1	0	0	0	0	0	1	0	0	1	0	0	1	1	1	1	0	0	0	1	1	0	0	1	0	0
1	0	0	1	0	1	0	0	1	0	1	1	0	1	0	0	0	0	1	0	0	0	1	1	1	1	1	0	1	0	0	0	0	1	1	0	1	1	1	1	1	0	0	0	1	0	0	1	0	0
1	1	0	1	0	0	1	0	0	0	1	1	0	1	0	0	0	1	1	1	0	0	0	1	1	1	1	0	1	0	1	0	0	0	0	0	1	1	1	1	1	0	1	0	1	0	0	0	0	0
0	1	0	0	0	1	1	0	1	0	1	0	0	1	0	0	0	1	1	0	1	0	1	0	1	0	1	0	0	1	1	0	0	1	0	0	1	1	1	1	0	0	0	0	1	0	0	0	0	0
1	0	0	1	0	0	0	0	1	0	1	1	0	1	0	0	1	0	1	0	1	0	1	1	1	1	0	0	1	0	0	0	0	1	0	0	1	1	1	1	1	0	0	1	1	0	0	1	0	0
1	1	0	1	0	0	1	0	0	0	1	1	0	1	0	0	0	0	1	0	0	0	0	1	1	1	1	0	1	0	1	0	0	0	1	0	1	1	1	1	1	0	0	0	1	0	0	1	0	0
1	1	0	0	0	1	1	0	1	0	1	0	0	1	0	0	0	1	1	1	0	0	1	0	1	0	1	0	0	0	1	0	0	1	0	0	1	1	1	1	0	0	1	0	1	0	0	0	0	0
Attractor	54
Type	:	cyclic
Ratio	:	0.00183
AKT	AP1	Apoptosis	ATF2	ATM	BCL2	CREB	DNA_damage	DUSP1	EGFR	EGFR_stimulus	ELK1	ERK	FGFR3	FGFR3_stimulus	FOS	FOXO3	FRS2	GAB1	GADD45	GRB2	Growth_Arrest	JNK	JUN	MAP3K1_3	MAX	MDM2	MEK1_2	MSK	MTK1	MYC	p14	p21	p38	p53	p70	PDK1	PI3K	PKC	PLCG	PPP2CA	Proliferation	PTEN	RAF	RAS	RSK	SMAD	SOS	SPRY	TAK1
0	0	0	1	0	1	0	0	1	0	1	1	0	1	1	0	0	0	1	0	1	0	1	1	1	1	1	0	1	1	0	0	0	1	0	1	1	1	1	1	1	0	0	0	1	1	0	1	1	0
1	1	0	1	0	0	1	0	0	0	1	1	0	1	1	0	1	0	1	0	0	0	1	1	1	1	0	0	1	0	1	0	0	1	0	0	1	1	1	1	1	0	0	1	1	0	0	0	0	0
1	1	0	1	0	1	1	0	1	0	1	1	0	1	1	0	0	1	1	0	0	0	1	1	1	1	1	0	1	0	1	0	0	1	1	0	1	1	1	1	1	0	0	0	1	0	0	0	0	0
1	1	0	1	0	1	1	0	1	0	1	1	0	1	1	0	0	1	1	1	1	0	0	1	1	1	1	0	1	0	1	0	0	0	0	0	1	1	1	1	1	0	1	0	1	0	0	0	0	0
0	1	0	0	0	1	1	0	1	0	1	0	0	1	1	0	0	0	1	0	1	0	0	0	1	0	1	0	0	1	1	0	0	0	0	0	1	1	1	1	0	0	0	0	1	0	0	1	0	0
1	0	0	0	0	0	0	0	1	0	1	0	0	1	1	0	0	0	1	0	0	0	1	0	1	0	0	0	0	0	0	0	0	1	0	0	1	1	1	1	0	0	0	1	1	0	0	1	0	0
1	0	0	1	0	0	0	0	0	0	1	1	0	1	1	0	0	1	1	0	0	0	0	1	1	1	1	1	1	0	0	0	0	0	1	0	1	1	1	1	1	0	0	0	1	0	0	0	0	0
1	1	0	0	0	0	1	0	0	0	1	0	1	1	1	0	0	1	1	1	1	0	1	0	1	0	1	0	0	0	1	0	0	1	0	0	1	1	1	1	0	0	1	0	1	0	0	0	0	0
Attractor	55
Type	:	cyclic
Ratio	:	0.00334
AKT	AP1	Apoptosis	ATF2	ATM	BCL2	CREB	DNA_damage	DUSP1	EGFR	EGFR_stimulus	ELK1	ERK	FGFR3	FGFR3_stimulus	FOS	FOXO3	FRS2	GAB1	GADD45	GRB2	Growth_Arrest	JNK	JUN	MAP3K1_3	MAX	MDM2	MEK1_2	MSK	MTK1	MYC	p14	p21	p38	p53	p70	PDK1	PI3K	PKC	PLCG	PPP2CA	Proliferation	PTEN	RAF	RAS	RSK	SMAD	SOS	SPRY	TAK1
0	0	0	1	0	0	0	0	1	0	1	1	0	1	1	0	1	0	1	0	0	0	1	1	1	1	0	0	1	1	0	0	0	1	0	0	1	1	1	1	1	0	0	1	1	0	0	1	0	0
1	1	0	1	0	0	1	0	0	0	1	1	0	1	1	0	1	1	1	0	0	0	1	1	1	1	0	0	1	0	1	0	0	1	1	0	1	1	1	1	1	0	0	1	1	0	0	0	0	0
1	1	1	1	0	1	1	0	1	0	1	1	0	1	1	0	0	1	1	1	1	0	1	1	1	1	1	0	1	0	1	0	0	1	1	0	1	1	1	1	1	0	1	0	1	0	0	0	0	0
0	1	0	1	0	1	1	0	1	0	1	1	0	1	1	0	0	0	1	1	1	0	0	1	1	1	1	0	1	1	1	0	0	0	0	0	1	1	1	1	1	0	1	0	1	0	0	1	0	0
0	1	0	0	0	0	1	0	1	0	1	0	0	1	1	0	0	0	1	0	0	0	1	0	1	0	0	0	0	1	1	0	0	1	0	0	1	1	1	1	0	0	0	1	1	0	0	1	0	0
1	0	0	1	0	0	0	0	1	0	1	1	0	1	1	0	1	1	1	0	0	0	1	1	1	1	0	0	1	0	0	0	0	1	1	0	1	1	1	1	1	0	0	1	1	0	0	0	0	0
1	1	1	1	0	0	1	0	0	0	1	1	0	1	1	0	0	1	1	1	1	0	0	1	1	1	1	0	1	0	1	0	0	0	1	0	1	1	1	1	1	0	1	0	1	0	0	0	0	0
0	1	0	0	0	1	1	0	1	0	1	0	0	1	1	0	0	0	1	1	1	0	1	0	1	0	1	0	0	1	1	0	0	1	0	0	1	1	1	1	0	0	1	0	1	0	0	1	0	0
Attractor	56
Type	:	cyclic
Ratio	:	0.00309
AKT	AP1	Apoptosis	ATF2	ATM	BCL2	CREB	DNA_damage	DUSP1	EGFR	EGFR_stimulus	ELK1	ERK	FGFR3	FGFR3_stimulus	FOS	FOXO3	FRS2	GAB1	GADD45	GRB2	Growth_Arrest	JNK	JUN	MAP3K1_3	MAX	MDM2	MEK1_2	MSK	MTK1	MYC	p14	p21	p38	p53	p70	PDK1	PI3K	PKC	PLCG	PPP2CA	Proliferation	PTEN	RAF	RAS	RSK	SMAD	SOS	SPRY	TAK1
0	0	0	1	0	0	0	0	1	0	0	1	0	1	1	0	1	0	1	0	1	0	1	1	1	1	0	0	1	1	0	0	0	1	0	0	1	1	1	1	1	0	0	1	1	0	0	1	0	0
1	1	0	1	0	0	1	0	0	0	0	1	0	1	1	0	1	0	1	0	0	0	1	1	1	1	0	0	1	0	1	0	0	1	1	0	1	1	1	1	1	0	0	1	1	0	0	1	0	0
1	1	1	1	0	1	1	0	1	0	0	1	0	1	1	0	0	1	1	1	0	0	1	1	1	1	1	0	1	0	1	0	0	1	1	0	1	1	1	1	1	0	1	0	1	0	0	0	0	0
0	1	0	1	0	1	1	0	1	0	0	1	0	1	1	0	0	1	1	1	1	0	0	1	1	1	1	0	1	1	1	0	0	0	0	0	1	1	1	1	1	0	1	0	1	0	0	0	0	0
0	1	0	0	0	0	1	0	1	0	0	0	0	1	1	0	0	0	1	0	1	0	1	0	1	0	0	0	0	1	1	0	0	1	0	0	1	1	1	1	0	0	0	1	1	0	0	1	0	0
1	0	0	1	0	0	0	0	1	0	0	1	0	1	1	0	1	0	1	0	0	0	1	1	1	1	0	0	1	0	0	0	0	1	1	0	1	1	1	1	1	0	0	1	1	0	0	1	0	0
1	1	1	1	0	0	1	0	0	0	0	1	0	1	1	0	0	1	1	1	0	0	0	1	1	1	1	0	1	0	1	0	0	0	1	0	1	1	1	1	1	0	1	0	1	0	0	0	0	0
0	1	0	0	0	1	1	0	1	0	0	0	0	1	1	0	0	1	1	1	1	0	1	0	1	0	1	0	0	1	1	0	0	1	0	0	1	1	1	1	0	0	1	0	1	0	0	0	0	0
Attractor	57
Type	:	cyclic
Ratio	:	0.00188
AKT	AP1	Apoptosis	ATF2	ATM	BCL2	CREB	DNA_damage	DUSP1	EGFR	EGFR_stimulus	ELK1	ERK	FGFR3	FGFR3_stimulus	FOS	FOXO3	FRS2	GAB1	GADD45	GRB2	Growth_Arrest	JNK	JUN	MAP3K1_3	MAX	MDM2	MEK1_2	MSK	MTK1	MYC	p14	p21	p38	p53	p70	PDK1	PI3K	PKC	PLCG	PPP2CA	Proliferation	PTEN	RAF	RAS	RSK	SMAD	SOS	SPRY	TAK1
0	0	0	1	0	1	0	0	1	0	1	1	0	1	0	0	0	0	1	0	1	0	1	1	1	1	1	0	1	1	0	0	0	1	0	1	1	1	1	1	1	0	0	0	1	1	0	1	1	0
1	1	0	1	0	0	1	0	0	0	1	1	0	1	0	0	1	0	1	0	0	0	1	1	1	1	0	0	1	0	1	0	0	1	0	0	1	1	1	1	1	0	0	1	1	0	0	0	0	0
1	1	0	1	0	1	1	0	1	0	1	1	0	1	0	0	0	1	1	0	0	0	1	1	1	1	1	0	1	0	1	0	0	1	1	0	1	1	1	1	1	0	0	0	1	0	0	0	0	0
1	1	0	1	0	1	1	0	1	0	1	1	0	1	0	0	0	1	1	1	1	0	0	1	1	1	1	0	1	0	1	0	0	0	0	0	1	1	1	1	1	0	1	0	1	0	0	0	0	0
0	1	0	0	0	1	1	0	1	0	1	0	0	1	0	0	0	0	1	0	1	0	0	0	1	0	1	0	0	1	1	0	0	0	0	0	1	1	1	1	0	0	0	0	1	0	0	1	0	0
1	0	0	0	0	0	0	0	1	0	1	0	0	1	0	0	0	0	1	0	0	0	1	0	1	0	0	0	0	0	0	0	0	1	0	0	1	1	1	1	0	0	0	1	1	0	0	1	0	0
1	0	0	1	0	0	0	0	0	0	1	1	0	1	0	0	0	1	1	0	0	0	0	1	1	1	1	1	1	0	0	0	0	0	1	0	1	1	1	1	1	0	0	0	1	0	0	0	0	0
1	1	0	0	0	0	1	0	0	0	1	0	1	1	0	0	0	1	1	1	1	0	1	0	1	0	1	0	0	0	1	0	0	1	0	0	1	1	1	1	0	0	1	0	1	0	0	0	0	0
Attractor	58
Type	:	cyclic
Ratio	:	0.00312
AKT	AP1	Apoptosis	ATF2	ATM	BCL2	CREB	DNA_damage	DUSP1	EGFR	EGFR_stimulus	ELK1	ERK	FGFR3	FGFR3_stimulus	FOS	FOXO3	FRS2	GAB1	GADD45	GRB2	Growth_Arrest	JNK	JUN	MAP3K1_3	MAX	MDM2	MEK1_2	MSK	MTK1	MYC	p14	p21	p38	p53	p70	PDK1	PI3K	PKC	PLCG	PPP2CA	Proliferation	PTEN	RAF	RAS	RSK	SMAD	SOS	SPRY	TAK1
0	0	0	0	0	1	0	0	1	0	0	0	0	1	0	0	0	0	1	0	0	0	1	0	1	0	1	0	0	1	0	0	0	1	0	0	1	1	1	1	0	0	0	0	1	0	0	1	0	0
1	0	0	1	0	0	0	0	0	0	0	1	0	1	0	0	1	1	1	0	0	0	1	1	1	1	0	1	1	0	0	0	0	1	0	0	1	1	1	1	1	0	0	1	1	0	0	0	0	0
1	1	0	1	0	0	1	0	0	0	0	1	1	1	0	0	0	1	1	0	1	0	1	1	1	1	1	0	1	0	1	0	0	1	1	0	1	1	1	1	1	0	0	0	1	0	0	0	0	0
1	1	0	1	0	1	1	0	1	0	0	1	0	1	0	0	0	0	1	1	1	0	1	1	1	1	1	0	1	0	1	0	0	1	0	1	1	1	1	1	1	0	1	0	1	1	0	1	1	0
0	1	0	1	0	1	1	0	1	0	0	1	0	1	0	0	0	0	1	0	0	0	0	1	1	1	1	0	1	1	1	0	0	0	0	0	1	1	1	1	1	1	0	0	1	0	0	0	0	0
1	1	0	0	0	0	1	0	1	0	0	0	0	1	0	0	0	1	1	0	0	0	1	0	1	0	0	0	0	0	1	0	0	1	0	0	1	1	1	1	0	0	0	1	1	0	0	0	0	0
1	0	0	1	0	1	0	0	1	0	0	1	0	1	0	0	0	1	1	0	1	0	0	1	1	1	1	0	1	0	0	0	0	0	1	0	1	1	1	1	1	0	0	0	1	0	0	0	0	0
1	1	0	0	0	0	1	0	0	0	0	0	0	1	0	0	0	0	1	1	1	0	0	0	1	0	1	0	0	0	1	0	0	0	0	0	1	1	1	1	0	0	1	0	1	0	0	1	0	0
Attractor	59
Type	:	cyclic
Ratio	:	0.00285
AKT	AP1	Apoptosis	ATF2	ATM	BCL2	CREB	DNA_damage	DUSP1	EGFR	EGFR_stimulus	ELK1	ERK	FGFR3	FGFR3_stimulus	FOS	FOXO3	FRS2	GAB1	GADD45	GRB2	Growth_Arrest	JNK	JUN	MAP3K1_3	MAX	MDM2	MEK1_2	MSK	MTK1	MYC	p14	p21	p38	p53	p70	PDK1	PI3K	PKC	PLCG	PPP2CA	Proliferation	PTEN	RAF	RAS	RSK	SMAD	SOS	SPRY	TAK1
0	0	0	1	0	0	0	0	1	0	0	1	0	1	1	0	1	1	1	0	1	0	1	1	1	1	0	0	1	1	0	0	0	1	0	0	1	1	1	1	1	0	0	1	1	0	0	0	0	0
1	1	0	1	0	0	1	0	0	0	0	1	0	1	1	0	1	0	1	0	1	0	1	1	1	1	0	0	1	0	1	0	0	1	1	0	1	1	1	1	1	0	0	1	1	0	0	1	0	0
1	1	1	1	0	1	1	0	1	0	0	1	0	1	1	0	0	0	1	1	0	0	1	1	1	1	1	0	1	0	1	0	0	1	1	0	1	1	1	1	1	0	1	0	1	0	0	1	0	0
0	1	0	1	0	1	1	0	1	0	0	1	0	1	1	0	0	1	1	1	0	0	0	1	1	1	1	0	1	1	1	0	0	0	0	0	1	1	1	1	1	0	1	0	1	0	0	0	0	0
0	1	0	0	0	0	1	0	1	0	0	0	0	1	1	0	0	1	1	0	1	0	1	0	1	0	0	0	0	1	1	0	0	1	0	0	1	1	1	1	0	0	0	1	1	0	0	0	0	0
1	0	0	1	0	0	0	0	1	0	0	1	0	1	1	0	1	0	1	0	1	0	1	1	1	1	0	0	1	0	0	0	0	1	1	0	1	1	1	1	1	0	0	1	1	0	0	1	0	0
1	1	1	1	0	0	1	0	0	0	0	1	0	1	1	0	0	0	1	1	0	0	0	1	1	1	1	0	1	0	1	0	0	0	1	0	1	1	1	1	1	0	1	0	1	0	0	1	0	0
0	1	0	0	0	1	1	0	1	0	0	0	0	1	1	0	0	1	1	1	0	0	1	0	1	0	1	0	0	1	1	0	0	1	0	0	1	1	1	1	0	0	1	0	1	0	0	0	0	0
Attractor	60
Type	:	cyclic
Ratio	:	0.00169
AKT	AP1	Apoptosis	ATF2	ATM	BCL2	CREB	DNA_damage	DUSP1	EGFR	EGFR_stimulus	ELK1	ERK	FGFR3	FGFR3_stimulus	FOS	FOXO3	FRS2	GAB1	GADD45	GRB2	Growth_Arrest	JNK	JUN	MAP3K1_3	MAX	MDM2	MEK1_2	MSK	MTK1	MYC	p14	p21	p38	p53	p70	PDK1	PI3K	PKC	PLCG	PPP2CA	Proliferation	PTEN	RAF	RAS	RSK	SMAD	SOS	SPRY	TAK1
0	0	0	1	0	1	0	0	1	0	0	1	0	1	1	0	0	1	1	0	1	0	1	1	1	1	1	0	1	1	0	0	0	1	0	1	1	1	1	1	1	0	0	0	1	1	0	0	1	0
1	1	0	1	0	0	1	0	0	0	0	1	0	1	1	0	1	0	1	0	1	0	1	1	1	1	0	0	1	0	1	0	0	1	0	0	1	1	1	1	1	0	0	1	1	0	0	0	0	0
1	1	0	1	0	1	1	0	1	0	0	1	0	1	1	0	0	0	1	0	0	0	1	1	1	1	1	0	1	0	1	0	0	1	1	0	1	1	1	1	1	0	0	0	1	0	0	1	0	0
1	1	0	1	0	1	1	0	1	0	0	1	0	1	1	0	0	1	1	1	0	0	0	1	1	1	1	0	1	0	1	0	0	0	0	0	1	1	1	1	1	0	1	0	1	0	0	0	0	0
0	1	0	0	0	1	1	0	1	0	0	0	0	1	1	0	0	1	1	0	1	0	0	0	1	0	1	0	0	1	1	0	0	0	0	0	1	1	1	1	0	0	0	0	1	0	0	0	0	0
1	0	0	0	0	0	0	0	1	0	0	0	0	1	1	0	0	0	1	0	1	0	1	0	1	0	0	0	0	0	0	0	0	1	0	0	1	1	1	1	0	0	0	1	1	0	0	1	0	0
1	0	0	1	0	0	0	0	0	0	0	1	0	1	1	0	0	0	1	0	0	0	0	1	1	1	1	1	1	0	0	0	0	0	1	0	1	1	1	1	1	0	0	0	1	0	0	1	0	0
1	1	0	0	0	0	1	0	0	0	0	0	1	1	1	0	0	1	1	1	0	0	1	0	1	0	1	0	0	0	1	0	0	1	0	0	1	1	1	1	0	0	1	0	1	0	0	0	0	0
Attractor	61
Type	:	cyclic
Ratio	:	0.0033
AKT	AP1	Apoptosis	ATF2	ATM	BCL2	CREB	DNA_damage	DUSP1	EGFR	EGFR_stimulus	ELK1	ERK	FGFR3	FGFR3_stimulus	FOS	FOXO3	FRS2	GAB1	GADD45	GRB2	Growth_Arrest	JNK	JUN	MAP3K1_3	MAX	MDM2	MEK1_2	MSK	MTK1	MYC	p14	p21	p38	p53	p70	PDK1	PI3K	PKC	PLCG	PPP2CA	Proliferation	PTEN	RAF	RAS	RSK	SMAD	SOS	SPRY	TAK1
0	0	0	0	0	1	0	0	1	0	0	0	0	1	1	0	0	0	1	0	0	0	1	0	1	0	1	0	0	1	0	0	0	1	0	0	1	1	1	1	0	0	0	0	1	0	0	1	0	0
1	0	0	1	0	0	0	0	0	0	0	1	0	1	1	0	1	1	1	0	0	0	1	1	1	1	0	1	1	0	0	0	0	1	0	0	1	1	1	1	1	0	0	1	1	0	0	0	0	0
1	1	0	1	0	0	1	0	0	0	0	1	1	1	1	0	0	1	1	0	1	0	1	1	1	1	1	0	1	0	1	0	0	1	1	0	1	1	1	1	1	0	0	0	1	0	0	0	0	0
1	1	0	1	0	1	1	0	1	0	0	1	0	1	1	0	0	0	1	1	1	0	1	1	1	1	1	0	1	0	1	0	0	1	0	1	1	1	1	1	1	0	1	0	1	1	0	1	1	0
0	1	0	1	0	1	1	0	1	0	0	1	0	1	1	0	0	0	1	0	0	0	0	1	1	1	1	0	1	1	1	0	0	0	0	0	1	1	1	1	1	1	0	0	1	0	0	0	0	0
1	1	0	0	0	0	1	0	1	0	0	0	0	1	1	0	0	1	1	0	0	0	1	0	1	0	0	0	0	0	1	0	0	1	0	0	1	1	1	1	0	0	0	1	1	0	0	0	0	0
1	0	0	1	0	1	0	0	1	0	0	1	0	1	1	0	0	1	1	0	1	0	0	1	1	1	1	0	1	0	0	0	0	0	1	0	1	1	1	1	1	0	0	0	1	0	0	0	0	0
1	1	0	0	0	0	1	0	0	0	0	0	0	1	1	0	0	0	1	1	1	0	0	0	1	0	1	0	0	0	1	0	0	0	0	0	1	1	1	1	0	0	1	0	1	0	0	1	0	0
Attractor	62
Type	:	cyclic
Ratio	:	0.00647
AKT	AP1	Apoptosis	ATF2	ATM	BCL2	CREB	DNA_damage	DUSP1	EGFR	EGFR_stimulus	ELK1	ERK	FGFR3	FGFR3_stimulus	FOS	FOXO3	FRS2	GAB1	GADD45	GRB2	Growth_Arrest	JNK	JUN	MAP3K1_3	MAX	MDM2	MEK1_2	MSK	MTK1	MYC	p14	p21	p38	p53	p70	PDK1	PI3K	PKC	PLCG	PPP2CA	Proliferation	PTEN	RAF	RAS	RSK	SMAD	SOS	SPRY	TAK1
0	0	0	0	0	1	0	0	1	0	1	0	0	1	0	0	0	0	1	0	1	0	0	0	1	0	1	0	0	1	0	0	0	0	0	0	1	1	1	1	0	0	0	0	1	0	0	1	0	0
1	0	0	0	0	0	0	0	0	0	1	0	0	1	0	0	0	0	1	0	0	0	1	0	1	0	0	1	0	0	0	0	0	1	0	0	1	1	1	1	0	0	0	1	1	0	0	1	0	0
1	0	0	1	0	0	0	0	0	0	1	1	1	1	0	0	0	1	1	0	0	0	1	1	1	1	1	1	1	0	0	0	0	1	1	0	1	1	1	1	1	0	0	0	1	0	0	0	0	0
1	1	0	1	0	0	1	0	0	0	1	1	1	1	0	0	0	1	1	1	1	0	1	1	1	1	1	0	1	0	1	0	0	1	0	1	1	1	1	1	1	0	1	0	1	1	0	0	1	0
0	1	0	1	0	1	1	0	1	0	1	1	0	1	0	1	0	0	1	0	1	0	1	1	1	1	1	0	1	1	1	0	0	1	0	1	1	1	1	1	1	1	0	0	1	1	0	0	1	0
1	1	0	1	0	0	1	0	1	0	1	1	0	1	0	0	1	0	1	0	0	0	1	1	1	1	0	0	1	0	1	0	0	1	0	0	1	1	1	1	1	1	0	1	1	0	0	0	0	0
1	1	0	1	0	1	1	0	1	0	1	1	0	1	0	0	0	1	1	0	0	0	0	1	1	1	1	0	1	0	1	0	0	0	1	0	1	1	1	1	1	0	0	0	1	0	0	0	0	0
1	1	0	0	0	1	1	0	1	0	1	0	0	1	0	0	0	1	1	1	1	0	0	0	1	0	1	0	0	0	1	0	0	0	0	0	1	1	1	1	0	0	1	0	1	0	0	0	0	0
Attractor	63
Type	:	cyclic
Ratio	:	0.00369
AKT	AP1	Apoptosis	ATF2	ATM	BCL2	CREB	DNA_damage	DUSP1	EGFR	EGFR_stimulus	ELK1	ERK	FGFR3	FGFR3_stimulus	FOS	FOXO3	FRS2	GAB1	GADD45	GRB2	Growth_Arrest	JNK	JUN	MAP3K1_3	MAX	MDM2	MEK1_2	MSK	MTK1	MYC	p14	p21	p38	p53	p70	PDK1	PI3K	PKC	PLCG	PPP2CA	Proliferation	PTEN	RAF	RAS	RSK	SMAD	SOS	SPRY	TAK1
0	0	0	0	0	1	0	0	1	0	0	0	0	1	1	0	0	0	1	0	1	0	1	0	1	0	1	0	0	1	0	0	0	1	0	0	1	1	1	1	0	0	0	0	1	0	0	1	0	0
1	0	0	1	0	0	0	0	0	0	0	1	0	1	1	0	1	0	1	0	0	0	1	1	1	1	0	1	1	0	0	0	0	1	0	0	1	1	1	1	1	0	0	1	1	0	0	1	0	0
1	1	0	1	0	0	1	0	0	0	0	1	1	1	1	0	0	1	1	0	0	0	1	1	1	1	1	0	1	0	1	0	0	1	1	0	1	1	1	1	1	0	0	0	1	0	0	0	0	0
1	1	0	1	0	1	1	0	1	0	0	1	0	1	1	0	0	1	1	1	1	0	1	1	1	1	1	0	1	0	1	0	0	1	0	1	1	1	1	1	1	0	1	0	1	1	0	0	1	0
0	1	0	1	0	1	1	0	1	0	0	1	0	1	1	0	0	0	1	0	1	0	0	1	1	1	1	0	1	1	1	0	0	0	0	0	1	1	1	1	1	1	0	0	1	0	0	0	0	0
1	1	0	0	0	0	1	0	1	0	0	0	0	1	1	0	0	0	1	0	0	0	1	0	1	0	0	0	0	0	1	0	0	1	0	0	1	1	1	1	0	0	0	1	1	0	0	1	0	0
1	0	0	1	0	1	0	0	1	0	0	1	0	1	1	0	0	1	1	0	0	0	0	1	1	1	1	0	1	0	0	0	0	0	1	0	1	1	1	1	1	0	0	0	1	0	0	0	0	0
1	1	0	0	0	0	1	0	0	0	0	0	0	1	1	0	0	1	1	1	1	0	0	0	1	0	1	0	0	0	1	0	0	0	0	0	1	1	1	1	0	0	1	0	1	0	0	0	0	0
Attractor	64
Type	:	cyclic
Ratio	:	0.00186
AKT	AP1	Apoptosis	ATF2	ATM	BCL2	CREB	DNA_damage	DUSP1	EGFR	EGFR_stimulus	ELK1	ERK	FGFR3	FGFR3_stimulus	FOS	FOXO3	FRS2	GAB1	GADD45	GRB2	Growth_Arrest	JNK	JUN	MAP3K1_3	MAX	MDM2	MEK1_2	MSK	MTK1	MYC	p14	p21	p38	p53	p70	PDK1	PI3K	PKC	PLCG	PPP2CA	Proliferation	PTEN	RAF	RAS	RSK	SMAD	SOS	SPRY	TAK1
0	0	0	1	0	1	0	0	1	0	0	1	0	1	0	0	0	0	1	0	1	0	1	1	1	1	1	0	1	1	0	0	0	1	0	1	1	1	1	1	1	0	0	0	1	1	0	1	1	0
1	1	0	1	0	0	1	0	0	0	0	1	0	1	0	0	1	0	1	0	0	0	1	1	1	1	0	0	1	0	1	0	0	1	0	0	1	1	1	1	1	0	0	1	1	0	0	0	0	0
1	1	0	1	0	1	1	0	1	0	0	1	0	1	0	0	0	1	1	0	0	0	1	1	1	1	1	0	1	0	1	0	0	1	1	0	1	1	1	1	1	0	0	0	1	0	0	0	0	0
1	1	0	1	0	1	1	0	1	0	0	1	0	1	0	0	0	1	1	1	1	0	0	1	1	1	1	0	1	0	1	0	0	0	0	0	1	1	1	1	1	0	1	0	1	0	0	0	0	0
0	1	0	0	0	1	1	0	1	0	0	0	0	1	0	0	0	0	1	0	1	0	0	0	1	0	1	0	0	1	1	0	0	0	0	0	1	1	1	1	0	0	0	0	1	0	0	1	0	0
1	0	0	0	0	0	0	0	1	0	0	0	0	1	0	0	0	0	1	0	0	0	1	0	1	0	0	0	0	0	0	0	0	1	0	0	1	1	1	1	0	0	0	1	1	0	0	1	0	0
1	0	0	1	0	0	0	0	0	0	0	1	0	1	0	0	0	1	1	0	0	0	0	1	1	1	1	1	1	0	0	0	0	0	1	0	1	1	1	1	1	0	0	0	1	0	0	0	0	0
1	1	0	0	0	0	1	0	0	0	0	0	1	1	0	0	0	1	1	1	1	0	1	0	1	0	1	0	0	0	1	0	0	1	0	0	1	1	1	1	0	0	1	0	1	0	0	0	0	0
Attractor	65
Type	:	cyclic
Ratio	:	0.00315
AKT	AP1	Apoptosis	ATF2	ATM	BCL2	CREB	DNA_damage	DUSP1	EGFR	EGFR_stimulus	ELK1	ERK	FGFR3	FGFR3_stimulus	FOS	FOXO3	FRS2	GAB1	GADD45	GRB2	Growth_Arrest	JNK	JUN	MAP3K1_3	MAX	MDM2	MEK1_2	MSK	MTK1	MYC	p14	p21	p38	p53	p70	PDK1	PI3K	PKC	PLCG	PPP2CA	Proliferation	PTEN	RAF	RAS	RSK	SMAD	SOS	SPRY	TAK1
0	0	0	1	0	0	0	0	1	0	1	1	0	1	0	0	1	1	1	0	1	0	1	1	1	1	0	0	1	1	0	0	0	1	0	0	1	1	1	1	1	0	0	1	1	0	0	0	0	0
1	1	0	1	0	0	1	0	0	0	1	1	0	1	0	0	1	0	1	0	1	0	1	1	1	1	0	0	1	0	1	0	0	1	1	0	1	1	1	1	1	0	0	1	1	0	0	1	0	0
1	1	1	1	0	1	1	0	1	0	1	1	0	1	0	0	0	0	1	1	0	0	1	1	1	1	1	0	1	0	1	0	0	1	1	0	1	1	1	1	1	0	1	0	1	0	0	1	0	0
0	1	0	1	0	1	1	0	1	0	1	1	0	1	0	0	0	1	1	1	0	0	0	1	1	1	1	0	1	1	1	0	0	0	0	0	1	1	1	1	1	0	1	0	1	0	0	0	0	0
0	1	0	0	0	0	1	0	1	0	1	0	0	1	0	0	0	1	1	0	1	0	1	0	1	0	0	0	0	1	1	0	0	1	0	0	1	1	1	1	0	0	0	1	1	0	0	0	0	0
1	0	0	1	0	0	0	0	1	0	1	1	0	1	0	0	1	0	1	0	1	0	1	1	1	1	0	0	1	0	0	0	0	1	1	0	1	1	1	1	1	0	0	1	1	0	0	1	0	0
1	1	1	1	0	0	1	0	0	0	1	1	0	1	0	0	0	0	1	1	0	0	0	1	1	1	1	0	1	0	1	0	0	0	1	0	1	1	1	1	1	0	1	0	1	0	0	1	0	0
0	1	0	0	0	1	1	0	1	0	1	0	0	1	0	0	0	1	1	1	0	0	1	0	1	0	1	0	0	1	1	0	0	1	0	0	1	1	1	1	0	0	1	0	1	0	0	0	0	0
Attractor	66
Type	:	cyclic
Ratio	:	0.00289
AKT	AP1	Apoptosis	ATF2	ATM	BCL2	CREB	DNA_damage	DUSP1	EGFR	EGFR_stimulus	ELK1	ERK	FGFR3	FGFR3_stimulus	FOS	FOXO3	FRS2	GAB1	GADD45	GRB2	Growth_Arrest	JNK	JUN	MAP3K1_3	MAX	MDM2	MEK1_2	MSK	MTK1	MYC	p14	p21	p38	p53	p70	PDK1	PI3K	PKC	PLCG	PPP2CA	Proliferation	PTEN	RAF	RAS	RSK	SMAD	SOS	SPRY	TAK1
0	0	0	1	0	0	0	0	1	0	0	1	0	1	0	0	1	1	1	0	1	0	1	1	1	1	0	0	1	1	0	0	0	1	0	0	1	1	1	1	1	0	0	1	1	0	0	0	0	0
1	1	0	1	0	0	1	0	0	0	0	1	0	1	0	0	1	0	1	0	1	0	1	1	1	1	0	0	1	0	1	0	0	1	1	0	1	1	1	1	1	0	0	1	1	0	0	1	0	0
1	1	1	1	0	1	1	0	1	0	0	1	0	1	0	0	0	0	1	1	0	0	1	1	1	1	1	0	1	0	1	0	0	1	1	0	1	1	1	1	1	0	1	0	1	0	0	1	0	0
0	1	0	1	0	1	1	0	1	0	0	1	0	1	0	0	0	1	1	1	0	0	0	1	1	1	1	0	1	1	1	0	0	0	0	0	1	1	1	1	1	0	1	0	1	0	0	0	0	0
0	1	0	0	0	0	1	0	1	0	0	0	0	1	0	0	0	1	1	0	1	0	1	0	1	0	0	0	0	1	1	0	0	1	0	0	1	1	1	1	0	0	0	1	1	0	0	0	0	0
1	0	0	1	0	0	0	0	1	0	0	1	0	1	0	0	1	0	1	0	1	0	1	1	1	1	0	0	1	0	0	0	0	1	1	0	1	1	1	1	1	0	0	1	1	0	0	1	0	0
1	1	1	1	0	0	1	0	0	0	0	1	0	1	0	0	0	0	1	1	0	0	0	1	1	1	1	0	1	0	1	0	0	0	1	0	1	1	1	1	1	0	1	0	1	0	0	1	0	0
0	1	0	0	0	1	1	0	1	0	0	0	0	1	0	0	0	1	1	1	0	0	1	0	1	0	1	0	0	1	1	0	0	1	0	0	1	1	1	1	0	0	1	0	1	0	0	0	0	0
Attractor	67
Type	:	cyclic
Ratio	:	0.00041
AKT	AP1	Apoptosis	ATF2	ATM	BCL2	CREB	DNA_damage	DUSP1	EGFR	EGFR_stimulus	ELK1	ERK	FGFR3	FGFR3_stimulus	FOS	FOXO3	FRS2	GAB1	GADD45	GRB2	Growth_Arrest	JNK	JUN	MAP3K1_3	MAX	MDM2	MEK1_2	MSK	MTK1	MYC	p14	p21	p38	p53	p70	PDK1	PI3K	PKC	PLCG	PPP2CA	Proliferation	PTEN	RAF	RAS	RSK	SMAD	SOS	SPRY	TAK1
0	0	0	1	0	1	0	0	1	0	1	1	0	1	0	0	0	0	1	0	0	0	0	1	1	1	1	0	1	1	0	0	0	0	0	0	1	1	1	1	1	0	0	0	1	0	0	1	0	0
1	1	0	0	0	0	1	0	0	0	1	0	0	1	0	0	0	1	1	0	0	0	1	0	1	0	0	0	0	0	1	0	0	1	0	0	1	1	1	1	0	0	0	1	1	0	0	0	0	0
1	0	0	1	0	1	0	0	1	0	1	1	0	1	0	0	0	1	1	0	1	0	1	1	1	1	1	0	1	0	0	0	0	1	1	0	1	1	1	1	1	0	0	0	1	0	0	0	0	0
1	1	0	1	0	0	1	0	0	0	1	1	0	1	0	0	0	0	1	1	1	0	0	1	1	1	1	0	1	0	1	0	0	0	0	0	1	1	1	1	1	0	1	0	1	0	0	1	0	0
0	1	0	0	0	1	1	0	1	0	1	0	0	1	0	0	0	0	1	0	0	0	1	0	1	0	1	0	0	1	1	0	0	1	0	0	1	1	1	1	0	0	0	0	1	0	0	1	0	0
1	0	0	1	0	0	0	0	1	0	1	1	0	1	0	0	1	1	1	0	0	0	1	1	1	1	0	0	1	0	0	0	0	1	0	0	1	1	1	1	1	0	0	1	1	0	0	0	0	0
1	1	0	1	0	0	1	0	0	0	1	1	0	1	0	0	0	1	1	0	1	0	0	1	1	1	1	0	1	0	1	0	0	0	1	0	1	1	1	1	1	0	0	0	1	0	0	0	0	0
1	1	0	0	0	1	1	0	1	0	1	0	0	1	0	0	0	0	1	1	1	0	1	0	1	0	1	0	0	0	1	0	0	1	0	0	1	1	1	1	0	0	1	0	1	0	0	1	0	0
Attractor	68
Type	:	cyclic
Ratio	:	0.00162
AKT	AP1	Apoptosis	ATF2	ATM	BCL2	CREB	DNA_damage	DUSP1	EGFR	EGFR_stimulus	ELK1	ERK	FGFR3	FGFR3_stimulus	FOS	FOXO3	FRS2	GAB1	GADD45	GRB2	Growth_Arrest	JNK	JUN	MAP3K1_3	MAX	MDM2	MEK1_2	MSK	MTK1	MYC	p14	p21	p38	p53	p70	PDK1	PI3K	PKC	PLCG	PPP2CA	Proliferation	PTEN	RAF	RAS	RSK	SMAD	SOS	SPRY	TAK1
0	0	0	1	0	1	0	0	1	0	0	1	0	1	0	0	0	1	1	0	1	0	1	1	1	1	1	0	1	1	0	0	0	1	0	1	1	1	1	1	1	0	0	0	1	1	0	0	1	0
1	1	0	1	0	0	1	0	0	0	0	1	0	1	0	0	1	0	1	0	1	0	1	1	1	1	0	0	1	0	1	0	0	1	0	0	1	1	1	1	1	0	0	1	1	0	0	0	0	0
1	1	0	1	0	1	1	0	1	0	0	1	0	1	0	0	0	0	1	0	0	0	1	1	1	1	1	0	1	0	1	0	0	1	1	0	1	1	1	1	1	0	0	0	1	0	0	1	0	0
1	1	0	1	0	1	1	0	1	0	0	1	0	1	0	0	0	1	1	1	0	0	0	1	1	1	1	0	1	0	1	0	0	0	0	0	1	1	1	1	1	0	1	0	1	0	0	0	0	0
0	1	0	0	0	1	1	0	1	0	0	0	0	1	0	0	0	1	1	0	1	0	0	0	1	0	1	0	0	1	1	0	0	0	0	0	1	1	1	1	0	0	0	0	1	0	0	0	0	0
1	0	0	0	0	0	0	0	1	0	0	0	0	1	0	0	0	0	1	0	1	0	1	0	1	0	0	0	0	0	0	0	0	1	0	0	1	1	1	1	0	0	0	1	1	0	0	1	0	0
1	0	0	1	0	0	0	0	0	0	0	1	0	1	0	0	0	0	1	0	0	0	0	1	1	1	1	1	1	0	0	0	0	0	1	0	1	1	1	1	1	0	0	0	1	0	0	1	0	0
1	1	0	0	0	0	1	0	0	0	0	0	1	1	0	0	0	1	1	1	0	0	1	0	1	0	1	0	0	0	1	0	0	1	0	0	1	1	1	1	0	0	1	0	1	0	0	0	0	0
Attractor	69
Type	:	cyclic
Ratio	:	0.00144
AKT	AP1	Apoptosis	ATF2	ATM	BCL2	CREB	DNA_damage	DUSP1	EGFR	EGFR_stimulus	ELK1	ERK	FGFR3	FGFR3_stimulus	FOS	FOXO3	FRS2	GAB1	GADD45	GRB2	Growth_Arrest	JNK	JUN	MAP3K1_3	MAX	MDM2	MEK1_2	MSK	MTK1	MYC	p14	p21	p38	p53	p70	PDK1	PI3K	PKC	PLCG	PPP2CA	Proliferation	PTEN	RAF	RAS	RSK	SMAD	SOS	SPRY	TAK1
1	0	0	0	0	0	0	0	0	0	0	0	0	1	0	0	0	0	1	0	1	0	0	0	1	0	1	1	0	0	0	0	0	0	0	0	1	1	1	1	0	0	0	0	1	0	0	1	0	0
1	0	0	0	0	0	0	0	0	0	0	0	1	1	0	0	0	0	1	0	0	0	1	0	1	0	1	1	0	0	0	0	0	1	0	0	1	1	1	1	0	0	0	0	1	0	0	1	0	0
1	0	0	1	0	0	0	0	0	0	0	1	1	1	0	0	0	1	1	0	0	0	1	1	1	1	1	1	1	0	0	0	0	1	0	1	1	1	1	1	1	0	0	0	1	1	0	0	1	0
1	1	0	1	0	0	1	0	0	0	0	1	1	1	0	1	0	0	1	0	1	0	1	1	1	1	1	0	1	0	1	0	0	1	0	1	1	1	1	1	1	0	0	0	1	1	0	0	1	0
1	1	0	1	0	1	1	0	1	0	0	1	0	1	0	1	0	0	1	0	0	0	1	1	1	1	1	0	1	0	1	0	0	1	0	1	1	1	1	1	1	1	0	0	1	1	0	0	1	0
1	1	0	1	0	1	1	0	1	0	0	1	0	1	0	0	0	0	1	0	0	0	0	1	1	1	1	0	1	0	1	0	0	0	0	0	1	1	1	1	1	1	0	0	1	0	0	0	0	0
1	1	0	0	0	1	1	0	1	0	0	0	0	1	0	0	0	1	1	0	0	0	0	0	1	0	1	0	0	0	1	0	0	0	0	0	1	1	1	1	0	0	0	0	1	0	0	0	0	0
1	0	0	0	0	1	0	0	1	0	0	0	0	1	0	0	0	1	1	0	1	0	0	0	1	0	1	0	0	0	0	0	0	0	0	0	1	1	1	1	0	0	0	0	1	0	0	0	0	0
Attractor	70
Type	:	point
Ratio	:	0.0008
AKT	AP1	Apoptosis	ATF2	ATM	BCL2	CREB	DNA_damage	DUSP1	EGFR	EGFR_stimulus	ELK1	ERK	FGFR3	FGFR3_stimulus	FOS	FOXO3	FRS2	GAB1	GADD45	GRB2	Growth_Arrest	JNK	JUN	MAP3K1_3	MAX	MDM2	MEK1_2	MSK	MTK1	MYC	p14	p21	p38	p53	p70	PDK1	PI3K	PKC	PLCG	PPP2CA	Proliferation	PTEN	RAF	RAS	RSK	SMAD	SOS	SPRY	TAK1
1	1	0	1	0	1	1	0	1	0	1	1	0	1	0	0	0	0	1	1	1	0	1	1	1	1	1	0	1	1	1	0	0	1	0	0	1	1	1	1	1	0	0	0	1	0	1	1	0	1
Attractor	71
Type	:	cyclic
Ratio	:	0.00043
AKT	AP1	Apoptosis	ATF2	ATM	BCL2	CREB	DNA_damage	DUSP1	EGFR	EGFR_stimulus	ELK1	ERK	FGFR3	FGFR3_stimulus	FOS	FOXO3	FRS2	GAB1	GADD45	GRB2	Growth_Arrest	JNK	JUN	MAP3K1_3	MAX	MDM2	MEK1_2	MSK	MTK1	MYC	p14	p21	p38	p53	p70	PDK1	PI3K	PKC	PLCG	PPP2CA	Proliferation	PTEN	RAF	RAS	RSK	SMAD	SOS	SPRY	TAK1
0	0	0	1	0	1	0	0	1	0	1	1	0	1	1	0	0	0	1	0	1	0	0	1	1	1	1	0	1	1	0	0	0	0	0	0	1	1	1	1	1	0	0	0	1	0	0	1	0	0
1	1	0	0	0	0	1	0	0	0	1	0	0	1	1	0	0	0	1	0	0	0	1	0	1	0	0	0	0	0	1	0	0	1	0	0	1	1	1	1	0	0	0	1	1	0	0	1	0	0
1	0	0	1	0	1	0	0	1	0	1	1	0	1	1	0	0	1	1	0	0	0	1	1	1	1	1	0	1	0	0	0	0	1	1	0	1	1	1	1	1	0	0	0	1	0	0	0	0	0
1	1	0	1	0	0	1	0	0	0	1	1	0	1	1	0	0	1	1	1	1	0	0	1	1	1	1	0	1	0	1	0	0	0	0	0	1	1	1	1	1	0	1	0	1	0	0	0	0	0
0	1	0	0	0	1	1	0	1	0	1	0	0	1	1	0	0	0	1	0	1	0	1	0	1	0	1	0	0	1	1	0	0	1	0	0	1	1	1	1	0	0	0	0	1	0	0	1	0	0
1	0	0	1	0	0	0	0	1	0	1	1	0	1	1	0	1	0	1	0	0	0	1	1	1	1	0	0	1	0	0	0	0	1	0	0	1	1	1	1	1	0	0	1	1	0	0	1	0	0
1	1	0	1	0	0	1	0	0	0	1	1	0	1	1	0	0	1	1	0	0	0	0	1	1	1	1	0	1	0	1	0	0	0	1	0	1	1	1	1	1	0	0	0	1	0	0	0	0	0
1	1	0	0	0	1	1	0	1	0	1	0	0	1	1	0	0	1	1	1	1	0	1	0	1	0	1	0	0	0	1	0	0	1	0	0	1	1	1	1	0	0	1	0	1	0	0	0	0	0
Attractor	72
Type	:	cyclic
Ratio	:	0.00047
AKT	AP1	Apoptosis	ATF2	ATM	BCL2	CREB	DNA_damage	DUSP1	EGFR	EGFR_stimulus	ELK1	ERK	FGFR3	FGFR3_stimulus	FOS	FOXO3	FRS2	GAB1	GADD45	GRB2	Growth_Arrest	JNK	JUN	MAP3K1_3	MAX	MDM2	MEK1_2	MSK	MTK1	MYC	p14	p21	p38	p53	p70	PDK1	PI3K	PKC	PLCG	PPP2CA	Proliferation	PTEN	RAF	RAS	RSK	SMAD	SOS	SPRY	TAK1
0	0	0	1	0	1	0	0	1	0	0	1	0	1	1	0	0	0	1	0	0	0	0	1	1	1	1	0	1	1	0	0	0	0	0	0	1	1	1	1	1	0	0	0	1	0	0	1	0	0
1	1	0	0	0	0	1	0	0	0	0	0	0	1	1	0	0	1	1	0	0	0	1	0	1	0	0	0	0	0	1	0	0	1	0	0	1	1	1	1	0	0	0	1	1	0	0	0	0	0
1	0	0	1	0	1	0	0	1	0	0	1	0	1	1	0	0	1	1	0	1	0	1	1	1	1	1	0	1	0	0	0	0	1	1	0	1	1	1	1	1	0	0	0	1	0	0	0	0	0
1	1	0	1	0	0	1	0	0	0	0	1	0	1	1	0	0	0	1	1	1	0	0	1	1	1	1	0	1	0	1	0	0	0	0	0	1	1	1	1	1	0	1	0	1	0	0	1	0	0
0	1	0	0	0	1	1	0	1	0	0	0	0	1	1	0	0	0	1	0	0	0	1	0	1	0	1	0	0	1	1	0	0	1	0	0	1	1	1	1	0	0	0	0	1	0	0	1	0	0
1	0	0	1	0	0	0	0	1	0	0	1	0	1	1	0	1	1	1	0	0	0	1	1	1	1	0	0	1	0	0	0	0	1	0	0	1	1	1	1	1	0	0	1	1	0	0	0	0	0
1	1	0	1	0	0	1	0	0	0	0	1	0	1	1	0	0	1	1	0	1	0	0	1	1	1	1	0	1	0	1	0	0	0	1	0	1	1	1	1	1	0	0	0	1	0	0	0	0	0
1	1	0	0	0	1	1	0	1	0	0	0	0	1	1	0	0	0	1	1	1	0	1	0	1	0	1	0	0	0	1	0	0	1	0	0	1	1	1	1	0	0	1	0	1	0	0	1	0	0
Attractor	73
Type	:	point
Ratio	:	0.0008
AKT	AP1	Apoptosis	ATF2	ATM	BCL2	CREB	DNA_damage	DUSP1	EGFR	EGFR_stimulus	ELK1	ERK	FGFR3	FGFR3_stimulus	FOS	FOXO3	FRS2	GAB1	GADD45	GRB2	Growth_Arrest	JNK	JUN	MAP3K1_3	MAX	MDM2	MEK1_2	MSK	MTK1	MYC	p14	p21	p38	p53	p70	PDK1	PI3K	PKC	PLCG	PPP2CA	Proliferation	PTEN	RAF	RAS	RSK	SMAD	SOS	SPRY	TAK1
1	1	0	1	0	1	1	0	1	0	0	1	0	1	1	0	0	0	1	1	1	0	1	1	1	1	1	0	1	1	1	0	0	1	0	0	1	1	1	1	1	0	0	0	1	0	1	1	0	1
Attractor	74
Type	:	cyclic
Ratio	:	0.00178
AKT	AP1	Apoptosis	ATF2	ATM	BCL2	CREB	DNA_damage	DUSP1	EGFR	EGFR_stimulus	ELK1	ERK	FGFR3	FGFR3_stimulus	FOS	FOXO3	FRS2	GAB1	GADD45	GRB2	Growth_Arrest	JNK	JUN	MAP3K1_3	MAX	MDM2	MEK1_2	MSK	MTK1	MYC	p14	p21	p38	p53	p70	PDK1	PI3K	PKC	PLCG	PPP2CA	Proliferation	PTEN	RAF	RAS	RSK	SMAD	SOS	SPRY	TAK1
1	0	0	0	0	0	0	0	0	0	1	0	0	1	1	0	0	0	1	0	1	0	0	0	1	0	1	1	0	0	0	0	0	0	0	0	1	1	1	1	0	0	0	0	1	0	0	1	0	0
1	0	0	0	0	0	0	0	0	0	1	0	1	1	1	0	0	0	1	0	0	0	1	0	1	0	1	1	0	0	0	0	0	1	0	0	1	1	1	1	0	0	0	0	1	0	0	1	0	0
1	0	0	1	0	0	0	0	0	0	1	1	1	1	1	0	0	1	1	0	0	0	1	1	1	1	1	1	1	0	0	0	0	1	0	1	1	1	1	1	1	0	0	0	1	1	0	0	1	0
1	1	0	1	0	0	1	0	0	0	1	1	1	1	1	1	0	0	1	0	1	0	1	1	1	1	1	0	1	0	1	0	0	1	0	1	1	1	1	1	1	0	0	0	1	1	0	0	1	0
1	1	0	1	0	1	1	0	1	0	1	1	0	1	1	1	0	0	1	0	0	0	1	1	1	1	1	0	1	0	1	0	0	1	0	1	1	1	1	1	1	1	0	0	1	1	0	0	1	0
1	1	0	1	0	1	1	0	1	0	1	1	0	1	1	0	0	0	1	0	0	0	0	1	1	1	1	0	1	0	1	0	0	0	0	0	1	1	1	1	1	1	0	0	1	0	0	0	0	0
1	1	0	0	0	1	1	0	1	0	1	0	0	1	1	0	0	1	1	0	0	0	0	0	1	0	1	0	0	0	1	0	0	0	0	0	1	1	1	1	0	0	0	0	1	0	0	0	0	0
1	0	0	0	0	1	0	0	1	0	1	0	0	1	1	0	0	1	1	0	1	0	0	0	1	0	1	0	0	0	0	0	0	0	0	0	1	1	1	1	0	0	0	0	1	0	0	0	0	0
Attractor	75
Type	:	cyclic
Ratio	:	0.00036
AKT	AP1	Apoptosis	ATF2	ATM	BCL2	CREB	DNA_damage	DUSP1	EGFR	EGFR_stimulus	ELK1	ERK	FGFR3	FGFR3_stimulus	FOS	FOXO3	FRS2	GAB1	GADD45	GRB2	Growth_Arrest	JNK	JUN	MAP3K1_3	MAX	MDM2	MEK1_2	MSK	MTK1	MYC	p14	p21	p38	p53	p70	PDK1	PI3K	PKC	PLCG	PPP2CA	Proliferation	PTEN	RAF	RAS	RSK	SMAD	SOS	SPRY	TAK1
1	0	0	0	0	1	0	0	1	0	0	0	0	1	1	0	0	0	1	0	0	0	1	0	1	0	1	0	0	0	0	0	0	1	0	0	1	1	1	1	0	0	0	0	1	0	0	1	0	0
1	0	0	1	0	0	0	0	0	0	0	1	0	1	1	0	0	1	1	0	0	0	0	1	1	1	1	1	1	0	0	0	0	0	0	0	1	1	1	1	1	0	0	0	1	0	0	0	0	0
1	1	0	0	0	0	1	0	0	0	0	0	1	1	1	0	0	1	1	0	1	0	1	0	1	0	1	0	0	0	1	0	0	1	0	0	1	1	1	1	0	0	0	0	1	0	0	0	0	0
1	0	0	1	0	1	0	0	1	0	0	1	0	1	1	0	0	0	1	0	1	0	1	1	1	1	1	0	1	0	0	0	0	1	0	1	1	1	1	1	1	0	0	0	1	1	0	1	1	0
1	1	0	1	0	0	1	0	0	0	0	1	0	1	1	0	0	0	1	0	0	0	0	1	1	1	1	0	1	0	1	0	0	0	0	0	1	1	1	1	1	0	0	0	1	0	0	0	0	0
1	1	0	0	0	1	1	0	1	0	0	0	0	1	1	0	0	1	1	0	0	0	1	0	1	0	1	0	0	0	1	0	0	1	0	0	1	1	1	1	0	0	0	0	1	0	0	0	0	0
1	0	0	1	0	1	0	0	1	0	0	1	0	1	1	0	0	1	1	0	1	0	0	1	1	1	1	0	1	0	0	0	0	0	0	0	1	1	1	1	1	0	0	0	1	0	0	0	0	0
1	1	0	0	0	0	1	0	0	0	0	0	0	1	1	0	0	0	1	0	1	0	0	0	1	0	1	0	0	0	1	0	0	0	0	0	1	1	1	1	0	0	0	0	1	0	0	1	0	0
Attractor	76
Type	:	cyclic
Ratio	:	0.00023
AKT	AP1	Apoptosis	ATF2	ATM	BCL2	CREB	DNA_damage	DUSP1	EGFR	EGFR_stimulus	ELK1	ERK	FGFR3	FGFR3_stimulus	FOS	FOXO3	FRS2	GAB1	GADD45	GRB2	Growth_Arrest	JNK	JUN	MAP3K1_3	MAX	MDM2	MEK1_2	MSK	MTK1	MYC	p14	p21	p38	p53	p70	PDK1	PI3K	PKC	PLCG	PPP2CA	Proliferation	PTEN	RAF	RAS	RSK	SMAD	SOS	SPRY	TAK1
1	0	0	0	0	1	0	0	1	0	0	0	0	1	1	0	0	0	1	0	1	0	1	0	1	0	1	0	0	0	0	0	0	1	0	0	1	1	1	1	0	0	0	0	1	0	0	1	0	0
1	0	0	1	0	0	0	0	0	0	0	1	0	1	1	0	0	0	1	0	0	0	0	1	1	1	1	1	1	0	0	0	0	0	0	0	1	1	1	1	1	0	0	0	1	0	0	1	0	0
1	1	0	0	0	0	1	0	0	0	0	0	1	1	1	0	0	1	1	0	0	0	1	0	1	0	1	0	0	0	1	0	0	1	0	0	1	1	1	1	0	0	0	0	1	0	0	0	0	0
1	0	0	1	0	1	0	0	1	0	0	1	0	1	1	0	0	1	1	0	1	0	1	1	1	1	1	0	1	0	0	0	0	1	0	1	1	1	1	1	1	0	0	0	1	1	0	0	1	0
1	1	0	1	0	0	1	0	0	0	0	1	0	1	1	0	0	0	1	0	1	0	0	1	1	1	1	0	1	0	1	0	0	0	0	0	1	1	1	1	1	0	0	0	1	0	0	0	0	0
1	1	0	0	0	1	1	0	1	0	0	0	0	1	1	0	0	0	1	0	0	0	1	0	1	0	1	0	0	0	1	0	0	1	0	0	1	1	1	1	0	0	0	0	1	0	0	1	0	0
1	0	0	1	0	1	0	0	1	0	0	1	0	1	1	0	0	1	1	0	0	0	0	1	1	1	1	0	1	0	0	0	0	0	0	0	1	1	1	1	1	0	0	0	1	0	0	0	0	0
1	1	0	0	0	0	1	0	0	0	0	0	0	1	1	0	0	1	1	0	1	0	0	0	1	0	1	0	0	0	1	0	0	0	0	0	1	1	1	1	0	0	0	0	1	0	0	0	0	0
Attractor	77
Type	:	cyclic
Ratio	:	0.00155
AKT	AP1	Apoptosis	ATF2	ATM	BCL2	CREB	DNA_damage	DUSP1	EGFR	EGFR_stimulus	ELK1	ERK	FGFR3	FGFR3_stimulus	FOS	FOXO3	FRS2	GAB1	GADD45	GRB2	Growth_Arrest	JNK	JUN	MAP3K1_3	MAX	MDM2	MEK1_2	MSK	MTK1	MYC	p14	p21	p38	p53	p70	PDK1	PI3K	PKC	PLCG	PPP2CA	Proliferation	PTEN	RAF	RAS	RSK	SMAD	SOS	SPRY	TAK1
0	0	0	1	0	1	0	0	1	0	1	1	0	1	0	0	0	1	1	0	0	0	0	1	1	1	1	0	1	1	0	0	0	0	0	0	1	1	1	1	1	0	0	0	1	0	0	0	0	0
1	1	0	0	0	0	1	0	0	0	1	0	0	1	0	0	0	1	1	0	1	0	1	0	1	0	0	0	0	0	1	0	0	1	0	0	1	1	1	1	0	0	0	1	1	0	0	0	0	0
1	0	0	1	0	1	0	0	1	0	1	1	0	1	0	0	0	0	1	0	1	0	1	1	1	1	1	0	1	0	0	0	0	1	1	0	1	1	1	1	1	0	0	0	1	0	0	1	0	0
1	1	0	1	0	0	1	0	0	0	1	1	0	1	0	0	0	0	1	1	0	0	0	1	1	1	1	0	1	0	1	0	0	0	0	0	1	1	1	1	1	0	1	0	1	0	0	1	0	0
0	1	0	0	0	1	1	0	1	0	1	0	0	1	0	0	0	1	1	0	0	0	1	0	1	0	1	0	0	1	1	0	0	1	0	0	1	1	1	1	0	0	0	0	1	0	0	0	0	0
1	0	0	1	0	0	0	0	1	0	1	1	0	1	0	0	1	1	1	0	1	0	1	1	1	1	0	0	1	0	0	0	0	1	0	0	1	1	1	1	1	0	0	1	1	0	0	0	0	0
1	1	0	1	0	0	1	0	0	0	1	1	0	1	0	0	0	0	1	0	1	0	0	1	1	1	1	0	1	0	1	0	0	0	1	0	1	1	1	1	1	0	0	0	1	0	0	1	0	0
1	1	0	0	0	1	1	0	1	0	1	0	0	1	0	0	0	0	1	1	0	0	1	0	1	0	1	0	0	0	1	0	0	1	0	0	1	1	1	1	0	0	1	0	1	0	0	1	0	0
Attractor	78
Type	:	cyclic
Ratio	:	0.00116
AKT	AP1	Apoptosis	ATF2	ATM	BCL2	CREB	DNA_damage	DUSP1	EGFR	EGFR_stimulus	ELK1	ERK	FGFR3	FGFR3_stimulus	FOS	FOXO3	FRS2	GAB1	GADD45	GRB2	Growth_Arrest	JNK	JUN	MAP3K1_3	MAX	MDM2	MEK1_2	MSK	MTK1	MYC	p14	p21	p38	p53	p70	PDK1	PI3K	PKC	PLCG	PPP2CA	Proliferation	PTEN	RAF	RAS	RSK	SMAD	SOS	SPRY	TAK1
0	0	0	1	0	1	0	0	1	0	0	1	0	1	1	0	0	1	1	0	1	0	0	1	1	1	1	0	1	1	0	0	0	0	0	0	1	1	1	1	1	0	0	0	1	0	0	0	0	0
1	1	0	0	0	0	1	0	0	0	0	0	0	1	1	0	0	0	1	0	1	0	1	0	1	0	0	0	0	0	1	0	0	1	0	0	1	1	1	1	0	0	0	1	1	0	0	1	0	0
1	0	0	1	0	1	0	0	1	0	0	1	0	1	1	0	0	0	1	0	0	0	1	1	1	1	1	0	1	0	0	0	0	1	1	0	1	1	1	1	1	0	0	0	1	0	0	1	0	0
1	1	0	1	0	0	1	0	0	0	0	1	0	1	1	0	0	1	1	1	0	0	0	1	1	1	1	0	1	0	1	0	0	0	0	0	1	1	1	1	1	0	1	0	1	0	0	0	0	0
0	1	0	0	0	1	1	0	1	0	0	0	0	1	1	0	0	1	1	0	1	0	1	0	1	0	1	0	0	1	1	0	0	1	0	0	1	1	1	1	0	0	0	0	1	0	0	0	0	0
1	0	0	1	0	0	0	0	1	0	0	1	0	1	1	0	1	0	1	0	1	0	1	1	1	1	0	0	1	0	0	0	0	1	0	0	1	1	1	1	1	0	0	1	1	0	0	1	0	0
1	1	0	1	0	0	1	0	0	0	0	1	0	1	1	0	0	0	1	0	0	0	0	1	1	1	1	0	1	0	1	0	0	0	1	0	1	1	1	1	1	0	0	0	1	0	0	1	0	0
1	1	0	0	0	1	1	0	1	0	0	0	0	1	1	0	0	1	1	1	0	0	1	0	1	0	1	0	0	0	1	0	0	1	0	0	1	1	1	1	0	0	1	0	1	0	0	0	0	0
Attractor	79
Type	:	cyclic
Ratio	:	0.00324
AKT	AP1	Apoptosis	ATF2	ATM	BCL2	CREB	DNA_damage	DUSP1	EGFR	EGFR_stimulus	ELK1	ERK	FGFR3	FGFR3_stimulus	FOS	FOXO3	FRS2	GAB1	GADD45	GRB2	Growth_Arrest	JNK	JUN	MAP3K1_3	MAX	MDM2	MEK1_2	MSK	MTK1	MYC	p14	p21	p38	p53	p70	PDK1	PI3K	PKC	PLCG	PPP2CA	Proliferation	PTEN	RAF	RAS	RSK	SMAD	SOS	SPRY	TAK1
0	0	0	1	0	0	0	0	1	0	1	1	0	1	1	0	1	0	1	0	1	0	1	1	1	1	0	0	1	1	0	0	0	1	0	0	1	1	1	1	1	0	0	1	1	0	0	1	0	0
1	1	0	1	0	0	1	0	0	0	1	1	0	1	1	0	1	0	1	0	0	0	1	1	1	1	0	0	1	0	1	0	0	1	1	0	1	1	1	1	1	0	0	1	1	0	0	1	0	0
1	1	1	1	0	1	1	0	1	0	1	1	0	1	1	0	0	1	1	1	0	0	1	1	1	1	1	0	1	0	1	0	0	1	1	0	1	1	1	1	1	0	1	0	1	0	0	0	0	0
0	1	0	1	0	1	1	0	1	0	1	1	0	1	1	0	0	1	1	1	1	0	0	1	1	1	1	0	1	1	1	0	0	0	0	0	1	1	1	1	1	0	1	0	1	0	0	0	0	0
0	1	0	0	0	0	1	0	1	0	1	0	0	1	1	0	0	0	1	0	1	0	1	0	1	0	0	0	0	1	1	0	0	1	0	0	1	1	1	1	0	0	0	1	1	0	0	1	0	0
1	0	0	1	0	0	0	0	1	0	1	1	0	1	1	0	1	0	1	0	0	0	1	1	1	1	0	0	1	0	0	0	0	1	1	0	1	1	1	1	1	0	0	1	1	0	0	1	0	0
1	1	1	1	0	0	1	0	0	0	1	1	0	1	1	0	0	1	1	1	0	0	0	1	1	1	1	0	1	0	1	0	0	0	1	0	1	1	1	1	1	0	1	0	1	0	0	0	0	0
0	1	0	0	0	1	1	0	1	0	1	0	0	1	1	0	0	1	1	1	1	0	1	0	1	0	1	0	0	1	1	0	0	1	0	0	1	1	1	1	0	0	1	0	1	0	0	0	0	0
Attractor	80
Type	:	cyclic
Ratio	:	0.00106
AKT	AP1	Apoptosis	ATF2	ATM	BCL2	CREB	DNA_damage	DUSP1	EGFR	EGFR_stimulus	ELK1	ERK	FGFR3	FGFR3_stimulus	FOS	FOXO3	FRS2	GAB1	GADD45	GRB2	Growth_Arrest	JNK	JUN	MAP3K1_3	MAX	MDM2	MEK1_2	MSK	MTK1	MYC	p14	p21	p38	p53	p70	PDK1	PI3K	PKC	PLCG	PPP2CA	Proliferation	PTEN	RAF	RAS	RSK	SMAD	SOS	SPRY	TAK1
0	0	0	1	0	1	0	0	1	0	0	1	0	1	1	0	0	1	1	0	0	0	0	1	1	1	1	0	1	1	0	0	0	0	0	0	1	1	1	1	1	0	0	0	1	0	0	0	0	0
1	1	0	0	0	0	1	0	0	0	0	0	0	1	1	0	0	1	1	0	1	0	1	0	1	0	0	0	0	0	1	0	0	1	0	0	1	1	1	1	0	0	0	1	1	0	0	0	0	0
1	0	0	1	0	1	0	0	1	0	0	1	0	1	1	0	0	0	1	0	1	0	1	1	1	1	1	0	1	0	0	0	0	1	1	0	1	1	1	1	1	0	0	0	1	0	0	1	0	0
1	1	0	1	0	0	1	0	0	0	0	1	0	1	1	0	0	0	1	1	0	0	0	1	1	1	1	0	1	0	1	0	0	0	0	0	1	1	1	1	1	0	1	0	1	0	0	1	0	0
0	1	0	0	0	1	1	0	1	0	0	0	0	1	1	0	0	1	1	0	0	0	1	0	1	0	1	0	0	1	1	0	0	1	0	0	1	1	1	1	0	0	0	0	1	0	0	0	0	0
1	0	0	1	0	0	0	0	1	0	0	1	0	1	1	0	1	1	1	0	1	0	1	1	1	1	0	0	1	0	0	0	0	1	0	0	1	1	1	1	1	0	0	1	1	0	0	0	0	0
1	1	0	1	0	0	1	0	0	0	0	1	0	1	1	0	0	0	1	0	1	0	0	1	1	1	1	0	1	0	1	0	0	0	1	0	1	1	1	1	1	0	0	0	1	0	0	1	0	0
1	1	0	0	0	1	1	0	1	0	0	0	0	1	1	0	0	0	1	1	0	0	1	0	1	0	1	0	0	0	1	0	0	1	0	0	1	1	1	1	0	0	1	0	1	0	0	1	0	0
Attractor	81
Type	:	point
Ratio	:	0.00088
AKT	AP1	Apoptosis	ATF2	ATM	BCL2	CREB	DNA_damage	DUSP1	EGFR	EGFR_stimulus	ELK1	ERK	FGFR3	FGFR3_stimulus	FOS	FOXO3	FRS2	GAB1	GADD45	GRB2	Growth_Arrest	JNK	JUN	MAP3K1_3	MAX	MDM2	MEK1_2	MSK	MTK1	MYC	p14	p21	p38	p53	p70	PDK1	PI3K	PKC	PLCG	PPP2CA	Proliferation	PTEN	RAF	RAS	RSK	SMAD	SOS	SPRY	TAK1
1	1	0	1	0	1	1	0	1	0	1	1	0	1	1	0	0	0	1	1	1	0	1	1	1	1	1	0	1	1	1	0	0	1	0	0	1	1	1	1	1	0	0	0	1	0	1	1	0	1
Attractor	82
Type	:	cyclic
Ratio	:	0.00029
AKT	AP1	Apoptosis	ATF2	ATM	BCL2	CREB	DNA_damage	DUSP1	EGFR	EGFR_stimulus	ELK1	ERK	FGFR3	FGFR3_stimulus	FOS	FOXO3	FRS2	GAB1	GADD45	GRB2	Growth_Arrest	JNK	JUN	MAP3K1_3	MAX	MDM2	MEK1_2	MSK	MTK1	MYC	p14	p21	p38	p53	p70	PDK1	PI3K	PKC	PLCG	PPP2CA	Proliferation	PTEN	RAF	RAS	RSK	SMAD	SOS	SPRY	TAK1
1	0	0	0	0	1	0	0	1	0	1	0	0	1	0	0	0	0	1	0	1	0	1	0	1	0	1	0	0	0	0	0	0	1	0	0	1	1	1	1	0	0	0	0	1	0	0	1	0	0
1	0	0	1	0	0	0	0	0	0	1	1	0	1	0	0	0	0	1	0	0	0	0	1	1	1	1	1	1	0	0	0	0	0	0	0	1	1	1	1	1	0	0	0	1	0	0	1	0	0
1	1	0	0	0	0	1	0	0	0	1	0	1	1	0	0	0	1	1	0	0	0	1	0	1	0	1	0	0	0	1	0	0	1	0	0	1	1	1	1	0	0	0	0	1	0	0	0	0	0
1	0	0	1	0	1	0	0	1	0	1	1	0	1	0	0	0	1	1	0	1	0	1	1	1	1	1	0	1	0	0	0	0	1	0	1	1	1	1	1	1	0	0	0	1	1	0	0	1	0
1	1	0	1	0	0	1	0	0	0	1	1	0	1	0	0	0	0	1	0	1	0	0	1	1	1	1	0	1	0	1	0	0	0	0	0	1	1	1	1	1	0	0	0	1	0	0	0	0	0
1	1	0	0	0	1	1	0	1	0	1	0	0	1	0	0	0	0	1	0	0	0	1	0	1	0	1	0	0	0	1	0	0	1	0	0	1	1	1	1	0	0	0	0	1	0	0	1	0	0
1	0	0	1	0	1	0	0	1	0	1	1	0	1	0	0	0	1	1	0	0	0	0	1	1	1	1	0	1	0	0	0	0	0	0	0	1	1	1	1	1	0	0	0	1	0	0	0	0	0
1	1	0	0	0	0	1	0	0	0	1	0	0	1	0	0	0	1	1	0	1	0	0	0	1	0	1	0	0	0	1	0	0	0	0	0	1	1	1	1	0	0	0	0	1	0	0	0	0	0
Attractor	83
Type	:	cyclic
Ratio	:	0.00123
AKT	AP1	Apoptosis	ATF2	ATM	BCL2	CREB	DNA_damage	DUSP1	EGFR	EGFR_stimulus	ELK1	ERK	FGFR3	FGFR3_stimulus	FOS	FOXO3	FRS2	GAB1	GADD45	GRB2	Growth_Arrest	JNK	JUN	MAP3K1_3	MAX	MDM2	MEK1_2	MSK	MTK1	MYC	p14	p21	p38	p53	p70	PDK1	PI3K	PKC	PLCG	PPP2CA	Proliferation	PTEN	RAF	RAS	RSK	SMAD	SOS	SPRY	TAK1
0	0	0	1	0	1	0	0	1	0	1	1	0	1	1	0	0	1	1	0	1	0	0	1	1	1	1	0	1	1	0	0	0	0	0	0	1	1	1	1	1	0	0	0	1	0	0	0	0	0
1	1	0	0	0	0	1	0	0	0	1	0	0	1	1	0	0	0	1	0	1	0	1	0	1	0	0	0	0	0	1	0	0	1	0	0	1	1	1	1	0	0	0	1	1	0	0	1	0	0
1	0	0	1	0	1	0	0	1	0	1	1	0	1	1	0	0	0	1	0	0	0	1	1	1	1	1	0	1	0	0	0	0	1	1	0	1	1	1	1	1	0	0	0	1	0	0	1	0	0
1	1	0	1	0	0	1	0	0	0	1	1	0	1	1	0	0	1	1	1	0	0	0	1	1	1	1	0	1	0	1	0	0	0	0	0	1	1	1	1	1	0	1	0	1	0	0	0	0	0
0	1	0	0	0	1	1	0	1	0	1	0	0	1	1	0	0	1	1	0	1	0	1	0	1	0	1	0	0	1	1	0	0	1	0	0	1	1	1	1	0	0	0	0	1	0	0	0	0	0
1	0	0	1	0	0	0	0	1	0	1	1	0	1	1	0	1	0	1	0	1	0	1	1	1	1	0	0	1	0	0	0	0	1	0	0	1	1	1	1	1	0	0	1	1	0	0	1	0	0
1	1	0	1	0	0	1	0	0	0	1	1	0	1	1	0	0	0	1	0	0	0	0	1	1	1	1	0	1	0	1	0	0	0	1	0	1	1	1	1	1	0	0	0	1	0	0	1	0	0
1	1	0	0	0	1	1	0	1	0	1	0	0	1	1	0	0	1	1	1	0	0	1	0	1	0	1	0	0	0	1	0	0	1	0	0	1	1	1	1	0	0	1	0	1	0	0	0	0	0
Attractor	84
Type	:	point
Ratio	:	0.00078
AKT	AP1	Apoptosis	ATF2	ATM	BCL2	CREB	DNA_damage	DUSP1	EGFR	EGFR_stimulus	ELK1	ERK	FGFR3	FGFR3_stimulus	FOS	FOXO3	FRS2	GAB1	GADD45	GRB2	Growth_Arrest	JNK	JUN	MAP3K1_3	MAX	MDM2	MEK1_2	MSK	MTK1	MYC	p14	p21	p38	p53	p70	PDK1	PI3K	PKC	PLCG	PPP2CA	Proliferation	PTEN	RAF	RAS	RSK	SMAD	SOS	SPRY	TAK1
1	1	0	1	0	1	1	0	1	0	0	1	0	1	0	0	0	0	1	1	1	0	1	1	1	1	1	0	1	1	1	0	0	1	0	0	1	1	1	1	1	0	0	0	1	0	1	1	0	1
Attractor	85
Type	:	cyclic
Ratio	:	0.00018
AKT	AP1	Apoptosis	ATF2	ATM	BCL2	CREB	DNA_damage	DUSP1	EGFR	EGFR_stimulus	ELK1	ERK	FGFR3	FGFR3_stimulus	FOS	FOXO3	FRS2	GAB1	GADD45	GRB2	Growth_Arrest	JNK	JUN	MAP3K1_3	MAX	MDM2	MEK1_2	MSK	MTK1	MYC	p14	p21	p38	p53	p70	PDK1	PI3K	PKC	PLCG	PPP2CA	Proliferation	PTEN	RAF	RAS	RSK	SMAD	SOS	SPRY	TAK1
1	0	0	0	0	1	0	0	1	0	1	0	0	1	1	0	0	0	1	0	1	0	1	0	1	0	1	0	0	0	0	0	0	1	0	0	1	1	1	1	0	0	0	0	1	0	0	1	0	0
1	0	0	1	0	0	0	0	0	0	1	1	0	1	1	0	0	0	1	0	0	0	0	1	1	1	1	1	1	0	0	0	0	0	0	0	1	1	1	1	1	0	0	0	1	0	0	1	0	0
1	1	0	0	0	0	1	0	0	0	1	0	1	1	1	0	0	1	1	0	0	0	1	0	1	0	1	0	0	0	1	0	0	1	0	0	1	1	1	1	0	0	0	0	1	0	0	0	0	0
1	0	0	1	0	1	0	0	1	0	1	1	0	1	1	0	0	1	1	0	1	0	1	1	1	1	1	0	1	0	0	0	0	1	0	1	1	1	1	1	1	0	0	0	1	1	0	0	1	0
1	1	0	1	0	0	1	0	0	0	1	1	0	1	1	0	0	0	1	0	1	0	0	1	1	1	1	0	1	0	1	0	0	0	0	0	1	1	1	1	1	0	0	0	1	0	0	0	0	0
1	1	0	0	0	1	1	0	1	0	1	0	0	1	1	0	0	0	1	0	0	0	1	0	1	0	1	0	0	0	1	0	0	1	0	0	1	1	1	1	0	0	0	0	1	0	0	1	0	0
1	0	0	1	0	1	0	0	1	0	1	1	0	1	1	0	0	1	1	0	0	0	0	1	1	1	1	0	1	0	0	0	0	0	0	0	1	1	1	1	1	0	0	0	1	0	0	0	0	0
1	1	0	0	0	0	1	0	0	0	1	0	0	1	1	0	0	1	1	0	1	0	0	0	1	0	1	0	0	0	1	0	0	0	0	0	1	1	1	1	0	0	0	0	1	0	0	0	0	0
Attractor	86
Type	:	cyclic
Ratio	:	0.00043
AKT	AP1	Apoptosis	ATF2	ATM	BCL2	CREB	DNA_damage	DUSP1	EGFR	EGFR_stimulus	ELK1	ERK	FGFR3	FGFR3_stimulus	FOS	FOXO3	FRS2	GAB1	GADD45	GRB2	Growth_Arrest	JNK	JUN	MAP3K1_3	MAX	MDM2	MEK1_2	MSK	MTK1	MYC	p14	p21	p38	p53	p70	PDK1	PI3K	PKC	PLCG	PPP2CA	Proliferation	PTEN	RAF	RAS	RSK	SMAD	SOS	SPRY	TAK1
0	0	0	1	0	1	0	0	1	0	0	1	0	1	1	0	0	0	1	0	1	0	0	1	1	1	1	0	1	1	0	0	0	0	0	0	1	1	1	1	1	0	0	0	1	0	0	1	0	0
1	1	0	0	0	0	1	0	0	0	0	0	0	1	1	0	0	0	1	0	0	0	1	0	1	0	0	0	0	0	1	0	0	1	0	0	1	1	1	1	0	0	0	1	1	0	0	1	0	0
1	0	0	1	0	1	0	0	1	0	0	1	0	1	1	0	0	1	1	0	0	0	1	1	1	1	1	0	1	0	0	0	0	1	1	0	1	1	1	1	1	0	0	0	1	0	0	0	0	0
1	1	0	1	0	0	1	0	0	0	0	1	0	1	1	0	0	1	1	1	1	0	0	1	1	1	1	0	1	0	1	0	0	0	0	0	1	1	1	1	1	0	1	0	1	0	0	0	0	0
0	1	0	0	0	1	1	0	1	0	0	0	0	1	1	0	0	0	1	0	1	0	1	0	1	0	1	0	0	1	1	0	0	1	0	0	1	1	1	1	0	0	0	0	1	0	0	1	0	0
1	0	0	1	0	0	0	0	1	0	0	1	0	1	1	0	1	0	1	0	0	0	1	1	1	1	0	0	1	0	0	0	0	1	0	0	1	1	1	1	1	0	0	1	1	0	0	1	0	0
1	1	0	1	0	0	1	0	0	0	0	1	0	1	1	0	0	1	1	0	0	0	0	1	1	1	1	0	1	0	1	0	0	0	1	0	1	1	1	1	1	0	0	0	1	0	0	0	0	0
1	1	0	0	0	1	1	0	1	0	0	0	0	1	1	0	0	1	1	1	1	0	1	0	1	0	1	0	0	0	1	0	0	1	0	0	1	1	1	1	0	0	1	0	1	0	0	0	0	0
Attractor	87
Type	:	cyclic
Ratio	:	0.0004
AKT	AP1	Apoptosis	ATF2	ATM	BCL2	CREB	DNA_damage	DUSP1	EGFR	EGFR_stimulus	ELK1	ERK	FGFR3	FGFR3_stimulus	FOS	FOXO3	FRS2	GAB1	GADD45	GRB2	Growth_Arrest	JNK	JUN	MAP3K1_3	MAX	MDM2	MEK1_2	MSK	MTK1	MYC	p14	p21	p38	p53	p70	PDK1	PI3K	PKC	PLCG	PPP2CA	Proliferation	PTEN	RAF	RAS	RSK	SMAD	SOS	SPRY	TAK1
1	0	0	0	0	1	0	0	1	0	1	0	0	1	1	0	0	0	1	0	0	0	1	0	1	0	1	0	0	0	0	0	0	1	0	0	1	1	1	1	0	0	0	0	1	0	0	1	0	0
1	0	0	1	0	0	0	0	0	0	1	1	0	1	1	0	0	1	1	0	0	0	0	1	1	1	1	1	1	0	0	0	0	0	0	0	1	1	1	1	1	0	0	0	1	0	0	0	0	0
1	1	0	0	0	0	1	0	0	0	1	0	1	1	1	0	0	1	1	0	1	0	1	0	1	0	1	0	0	0	1	0	0	1	0	0	1	1	1	1	0	0	0	0	1	0	0	0	0	0
1	0	0	1	0	1	0	0	1	0	1	1	0	1	1	0	0	0	1	0	1	0	1	1	1	1	1	0	1	0	0	0	0	1	0	1	1	1	1	1	1	0	0	0	1	1	0	1	1	0
1	1	0	1	0	0	1	0	0	0	1	1	0	1	1	0	0	0	1	0	0	0	0	1	1	1	1	0	1	0	1	0	0	0	0	0	1	1	1	1	1	0	0	0	1	0	0	0	0	0
1	1	0	0	0	1	1	0	1	0	1	0	0	1	1	0	0	1	1	0	0	0	1	0	1	0	1	0	0	0	1	0	0	1	0	0	1	1	1	1	0	0	0	0	1	0	0	0	0	0
1	0	0	1	0	1	0	0	1	0	1	1	0	1	1	0	0	1	1	0	1	0	0	1	1	1	1	0	1	0	0	0	0	0	0	0	1	1	1	1	1	0	0	0	1	0	0	0	0	0
1	1	0	0	0	0	1	0	0	0	1	0	0	1	1	0	0	0	1	0	1	0	0	0	1	0	1	0	0	0	1	0	0	0	0	0	1	1	1	1	0	0	0	0	1	0	0	1	0	0
Attractor	88
Type	:	cyclic
Ratio	:	0.0004
AKT	AP1	Apoptosis	ATF2	ATM	BCL2	CREB	DNA_damage	DUSP1	EGFR	EGFR_stimulus	ELK1	ERK	FGFR3	FGFR3_stimulus	FOS	FOXO3	FRS2	GAB1	GADD45	GRB2	Growth_Arrest	JNK	JUN	MAP3K1_3	MAX	MDM2	MEK1_2	MSK	MTK1	MYC	p14	p21	p38	p53	p70	PDK1	PI3K	PKC	PLCG	PPP2CA	Proliferation	PTEN	RAF	RAS	RSK	SMAD	SOS	SPRY	TAK1
0	0	0	1	0	1	0	0	1	0	1	1	0	1	1	0	0	0	1	0	0	0	0	1	1	1	1	0	1	1	0	0	0	0	0	0	1	1	1	1	1	0	0	0	1	0	0	1	0	0
1	1	0	0	0	0	1	0	0	0	1	0	0	1	1	0	0	1	1	0	0	0	1	0	1	0	0	0	0	0	1	0	0	1	0	0	1	1	1	1	0	0	0	1	1	0	0	0	0	0
1	0	0	1	0	1	0	0	1	0	1	1	0	1	1	0	0	1	1	0	1	0	1	1	1	1	1	0	1	0	0	0	0	1	1	0	1	1	1	1	1	0	0	0	1	0	0	0	0	0
1	1	0	1	0	0	1	0	0	0	1	1	0	1	1	0	0	0	1	1	1	0	0	1	1	1	1	0	1	0	1	0	0	0	0	0	1	1	1	1	1	0	1	0	1	0	0	1	0	0
0	1	0	0	0	1	1	0	1	0	1	0	0	1	1	0	0	0	1	0	0	0	1	0	1	0	1	0	0	1	1	0	0	1	0	0	1	1	1	1	0	0	0	0	1	0	0	1	0	0
1	0	0	1	0	0	0	0	1	0	1	1	0	1	1	0	1	1	1	0	0	0	1	1	1	1	0	0	1	0	0	0	0	1	0	0	1	1	1	1	1	0	0	1	1	0	0	0	0	0
1	1	0	1	0	0	1	0	0	0	1	1	0	1	1	0	0	1	1	0	1	0	0	1	1	1	1	0	1	0	1	0	0	0	1	0	1	1	1	1	1	0	0	0	1	0	0	0	0	0
1	1	0	0	0	1	1	0	1	0	1	0	0	1	1	0	0	0	1	1	1	0	1	0	1	0	1	0	0	0	1	0	0	1	0	0	1	1	1	1	0	0	1	0	1	0	0	1	0	0
Attractor	89
Type	:	cyclic
Ratio	:	0.00045
AKT	AP1	Apoptosis	ATF2	ATM	BCL2	CREB	DNA_damage	DUSP1	EGFR	EGFR_stimulus	ELK1	ERK	FGFR3	FGFR3_stimulus	FOS	FOXO3	FRS2	GAB1	GADD45	GRB2	Growth_Arrest	JNK	JUN	MAP3K1_3	MAX	MDM2	MEK1_2	MSK	MTK1	MYC	p14	p21	p38	p53	p70	PDK1	PI3K	PKC	PLCG	PPP2CA	Proliferation	PTEN	RAF	RAS	RSK	SMAD	SOS	SPRY	TAK1
0	0	0	1	0	1	0	0	1	0	0	1	0	1	0	0	0	0	1	0	0	0	0	1	1	1	1	0	1	1	0	0	0	0	0	0	1	1	1	1	1	0	0	0	1	0	0	1	0	0
1	1	0	0	0	0	1	0	0	0	0	0	0	1	0	0	0	1	1	0	0	0	1	0	1	0	0	0	0	0	1	0	0	1	0	0	1	1	1	1	0	0	0	1	1	0	0	0	0	0
1	0	0	1	0	1	0	0	1	0	0	1	0	1	0	0	0	1	1	0	1	0	1	1	1	1	1	0	1	0	0	0	0	1	1	0	1	1	1	1	1	0	0	0	1	0	0	0	0	0
1	1	0	1	0	0	1	0	0	0	0	1	0	1	0	0	0	0	1	1	1	0	0	1	1	1	1	0	1	0	1	0	0	0	0	0	1	1	1	1	1	0	1	0	1	0	0	1	0	0
0	1	0	0	0	1	1	0	1	0	0	0	0	1	0	0	0	0	1	0	0	0	1	0	1	0	1	0	0	1	1	0	0	1	0	0	1	1	1	1	0	0	0	0	1	0	0	1	0	0
1	0	0	1	0	0	0	0	1	0	0	1	0	1	0	0	1	1	1	0	0	0	1	1	1	1	0	0	1	0	0	0	0	1	0	0	1	1	1	1	1	0	0	1	1	0	0	0	0	0
1	1	0	1	0	0	1	0	0	0	0	1	0	1	0	0	0	1	1	0	1	0	0	1	1	1	1	0	1	0	1	0	0	0	1	0	1	1	1	1	1	0	0	0	1	0	0	0	0	0
1	1	0	0	0	1	1	0	1	0	0	0	0	1	0	0	0	0	1	1	1	0	1	0	1	0	1	0	0	0	1	0	0	1	0	0	1	1	1	1	0	0	1	0	1	0	0	1	0	0
Attractor	90
Type	:	cyclic
Ratio	:	0.00041
AKT	AP1	Apoptosis	ATF2	ATM	BCL2	CREB	DNA_damage	DUSP1	EGFR	EGFR_stimulus	ELK1	ERK	FGFR3	FGFR3_stimulus	FOS	FOXO3	FRS2	GAB1	GADD45	GRB2	Growth_Arrest	JNK	JUN	MAP3K1_3	MAX	MDM2	MEK1_2	MSK	MTK1	MYC	p14	p21	p38	p53	p70	PDK1	PI3K	PKC	PLCG	PPP2CA	Proliferation	PTEN	RAF	RAS	RSK	SMAD	SOS	SPRY	TAK1
1	0	0	0	0	1	0	0	1	0	1	0	0	1	0	0	0	0	1	0	0	0	1	0	1	0	1	0	0	0	0	0	0	1	0	0	1	1	1	1	0	0	0	0	1	0	0	1	0	0
1	0	0	1	0	0	0	0	0	0	1	1	0	1	0	0	0	1	1	0	0	0	0	1	1	1	1	1	1	0	0	0	0	0	0	0	1	1	1	1	1	0	0	0	1	0	0	0	0	0
1	1	0	0	0	0	1	0	0	0	1	0	1	1	0	0	0	1	1	0	1	0	1	0	1	0	1	0	0	0	1	0	0	1	0	0	1	1	1	1	0	0	0	0	1	0	0	0	0	0
1	0	0	1	0	1	0	0	1	0	1	1	0	1	0	0	0	0	1	0	1	0	1	1	1	1	1	0	1	0	0	0	0	1	0	1	1	1	1	1	1	0	0	0	1	1	0	1	1	0
1	1	0	1	0	0	1	0	0	0	1	1	0	1	0	0	0	0	1	0	0	0	0	1	1	1	1	0	1	0	1	0	0	0	0	0	1	1	1	1	1	0	0	0	1	0	0	0	0	0
1	1	0	0	0	1	1	0	1	0	1	0	0	1	0	0	0	1	1	0	0	0	1	0	1	0	1	0	0	0	1	0	0	1	0	0	1	1	1	1	0	0	0	0	1	0	0	0	0	0
1	0	0	1	0	1	0	0	1	0	1	1	0	1	0	0	0	1	1	0	1	0	0	1	1	1	1	0	1	0	0	0	0	0	0	0	1	1	1	1	1	0	0	0	1	0	0	0	0	0
1	1	0	0	0	0	1	0	0	0	1	0	0	1	0	0	0	0	1	0	1	0	0	0	1	0	1	0	0	0	1	0	0	0	0	0	1	1	1	1	0	0	0	0	1	0	0	1	0	0
Attractor	91
Type	:	cyclic
Ratio	:	0.00028
AKT	AP1	Apoptosis	ATF2	ATM	BCL2	CREB	DNA_damage	DUSP1	EGFR	EGFR_stimulus	ELK1	ERK	FGFR3	FGFR3_stimulus	FOS	FOXO3	FRS2	GAB1	GADD45	GRB2	Growth_Arrest	JNK	JUN	MAP3K1_3	MAX	MDM2	MEK1_2	MSK	MTK1	MYC	p14	p21	p38	p53	p70	PDK1	PI3K	PKC	PLCG	PPP2CA	Proliferation	PTEN	RAF	RAS	RSK	SMAD	SOS	SPRY	TAK1
1	0	0	0	0	1	0	0	1	0	0	0	0	1	0	0	0	0	1	0	0	0	1	0	1	0	1	0	0	0	0	0	0	1	0	0	1	1	1	1	0	0	0	0	1	0	0	1	0	0
1	0	0	1	0	0	0	0	0	0	0	1	0	1	0	0	0	1	1	0	0	0	0	1	1	1	1	1	1	0	0	0	0	0	0	0	1	1	1	1	1	0	0	0	1	0	0	0	0	0
1	1	0	0	0	0	1	0	0	0	0	0	1	1	0	0	0	1	1	0	1	0	1	0	1	0	1	0	0	0	1	0	0	1	0	0	1	1	1	1	0	0	0	0	1	0	0	0	0	0
1	0	0	1	0	1	0	0	1	0	0	1	0	1	0	0	0	0	1	0	1	0	1	1	1	1	1	0	1	0	0	0	0	1	0	1	1	1	1	1	1	0	0	0	1	1	0	1	1	0
1	1	0	1	0	0	1	0	0	0	0	1	0	1	0	0	0	0	1	0	0	0	0	1	1	1	1	0	1	0	1	0	0	0	0	0	1	1	1	1	1	0	0	0	1	0	0	0	0	0
1	1	0	0	0	1	1	0	1	0	0	0	0	1	0	0	0	1	1	0	0	0	1	0	1	0	1	0	0	0	1	0	0	1	0	0	1	1	1	1	0	0	0	0	1	0	0	0	0	0
1	0	0	1	0	1	0	0	1	0	0	1	0	1	0	0	0	1	1	0	1	0	0	1	1	1	1	0	1	0	0	0	0	0	0	0	1	1	1	1	1	0	0	0	1	0	0	0	0	0
1	1	0	0	0	0	1	0	0	0	0	0	0	1	0	0	0	0	1	0	1	0	0	0	1	0	1	0	0	0	1	0	0	0	0	0	1	1	1	1	0	0	0	0	1	0	0	1	0	0
Attractor	92
Type	:	cyclic
Ratio	:	0.00028
AKT	AP1	Apoptosis	ATF2	ATM	BCL2	CREB	DNA_damage	DUSP1	EGFR	EGFR_stimulus	ELK1	ERK	FGFR3	FGFR3_stimulus	FOS	FOXO3	FRS2	GAB1	GADD45	GRB2	Growth_Arrest	JNK	JUN	MAP3K1_3	MAX	MDM2	MEK1_2	MSK	MTK1	MYC	p14	p21	p38	p53	p70	PDK1	PI3K	PKC	PLCG	PPP2CA	Proliferation	PTEN	RAF	RAS	RSK	SMAD	SOS	SPRY	TAK1
1	0	0	0	0	1	0	0	1	0	0	0	0	1	0	0	0	0	1	0	1	0	1	0	1	0	1	0	0	0	0	0	0	1	0	0	1	1	1	1	0	0	0	0	1	0	0	1	0	0
1	0	0	1	0	0	0	0	0	0	0	1	0	1	0	0	0	0	1	0	0	0	0	1	1	1	1	1	1	0	0	0	0	0	0	0	1	1	1	1	1	0	0	0	1	0	0	1	0	0
1	1	0	0	0	0	1	0	0	0	0	0	1	1	0	0	0	1	1	0	0	0	1	0	1	0	1	0	0	0	1	0	0	1	0	0	1	1	1	1	0	0	0	0	1	0	0	0	0	0
1	0	0	1	0	1	0	0	1	0	0	1	0	1	0	0	0	1	1	0	1	0	1	1	1	1	1	0	1	0	0	0	0	1	0	1	1	1	1	1	1	0	0	0	1	1	0	0	1	0
1	1	0	1	0	0	1	0	0	0	0	1	0	1	0	0	0	0	1	0	1	0	0	1	1	1	1	0	1	0	1	0	0	0	0	0	1	1	1	1	1	0	0	0	1	0	0	0	0	0
1	1	0	0	0	1	1	0	1	0	0	0	0	1	0	0	0	0	1	0	0	0	1	0	1	0	1	0	0	0	1	0	0	1	0	0	1	1	1	1	0	0	0	0	1	0	0	1	0	0
1	0	0	1	0	1	0	0	1	0	0	1	0	1	0	0	0	1	1	0	0	0	0	1	1	1	1	0	1	0	0	0	0	0	0	0	1	1	1	1	1	0	0	0	1	0	0	0	0	0
1	1	0	0	0	0	1	0	0	0	0	0	0	1	0	0	0	1	1	0	1	0	0	0	1	0	1	0	0	0	1	0	0	0	0	0	1	1	1	1	0	0	0	0	1	0	0	0	0	0
[truncated: 3 more columns]

## Sheet: Minimal FVSs
1	DNA_damage	EGFR_stimulus	FGFR3_stimulus	TGFBR_stimulus	ERK	p53	p38	PKC	GRB2	GAB1
2	DNA_damage	EGFR_stimulus	FGFR3_stimulus	TGFBR_stimulus	ERK	p53	p38	PKC	GRB2	PI3K
3	DNA_damage	EGFR_stimulus	FGFR3_stimulus	TGFBR_stimulus	ERK	p53	p38	GRB2	GAB1	PLCG
4	DNA_damage	EGFR_stimulus	FGFR3_stimulus	TGFBR_stimulus	ERK	p53	p38	GRB2	PI3K	PLCG
5	DNA_damage	EGFR_stimulus	FGFR3_stimulus	TGFBR_stimulus	ERK	p53	CREB	PKC	GRB2	GAB1
6	DNA_damage	EGFR_stimulus	FGFR3_stimulus	TGFBR_stimulus	ERK	p53	CREB	PKC	GRB2	PI3K
7	DNA_damage	EGFR_stimulus	FGFR3_stimulus	TGFBR_stimulus	ERK	p53	CREB	GRB2	GAB1	PLCG
8	DNA_damage	EGFR_stimulus	FGFR3_stimulus	TGFBR_stimulus	ERK	p53	CREB	GRB2	PI3K	PLCG
9	DNA_damage	EGFR_stimulus	FGFR3_stimulus	TGFBR_stimulus	ERK	p53	MSK	PKC	GRB2	GAB1
10	DNA_damage	EGFR_stimulus	FGFR3_stimulus	TGFBR_stimulus	ERK	p53	MSK	PKC	GRB2	PI3K
11	DNA_damage	EGFR_stimulus	FGFR3_stimulus	TGFBR_stimulus	ERK	p53	MSK	GRB2	GAB1	PLCG
12	DNA_damage	EGFR_stimulus	FGFR3_stimulus	TGFBR_stimulus	ERK	p53	MSK	GRB2	PI3K	PLCG
13	DNA_damage	EGFR_stimulus	FGFR3_stimulus	TGFBR_stimulus	ERK	p53	DUSP1	PKC	GRB2	GAB1
14	DNA_damage	EGFR_stimulus	FGFR3_stimulus	TGFBR_stimulus	ERK	p53	DUSP1	PKC	GRB2	PI3K
15	DNA_damage	EGFR_stimulus	FGFR3_stimulus	TGFBR_stimulus	ERK	p53	DUSP1	GRB2	GAB1	PLCG
16	DNA_damage	EGFR_stimulus	FGFR3_stimulus	TGFBR_stimulus	ERK	p53	DUSP1	GRB2	PI3K	PLCG
17	DNA_damage	EGFR_stimulus	FGFR3_stimulus	TGFBR_stimulus	ERK	p38	PKC	GRB2	GAB1	MDM2
18	DNA_damage	EGFR_stimulus	FGFR3_stimulus	TGFBR_stimulus	ERK	p38	PKC	GRB2	PI3K	MDM2
19	DNA_damage	EGFR_stimulus	FGFR3_stimulus	TGFBR_stimulus	ERK	p38	GRB2	GAB1	MDM2	PLCG
20	DNA_damage	EGFR_stimulus	FGFR3_stimulus	TGFBR_stimulus	ERK	p38	GRB2	PI3K	MDM2	PLCG
21	DNA_damage	EGFR_stimulus	FGFR3_stimulus	TGFBR_stimulus	p53	p38	PKC	GRB2	MEK1_2	GAB1
22	DNA_damage	EGFR_stimulus	FGFR3_stimulus	TGFBR_stimulus	p53	p38	PKC	GRB2	MEK1_2	PI3K
23	DNA_damage	EGFR_stimulus	FGFR3_stimulus	TGFBR_stimulus	p53	p38	GRB2	MEK1_2	GAB1	PLCG
24	DNA_damage	EGFR_stimulus	FGFR3_stimulus	TGFBR_stimulus	p53	p38	GRB2	MEK1_2	PI3K	PLCG
25	DNA_damage	EGFR_stimulus	FGFR3_stimulus	TGFBR_stimulus	p53	CREB	PKC	GRB2	MEK1_2	GAB1
26	DNA_damage	EGFR_stimulus	FGFR3_stimulus	TGFBR_stimulus	p53	CREB	PKC	GRB2	MEK1_2	PI3K
27	DNA_damage	EGFR_stimulus	FGFR3_stimulus	TGFBR_stimulus	p53	CREB	GRB2	MEK1_2	GAB1	PLCG
28	DNA_damage	EGFR_stimulus	FGFR3_stimulus	TGFBR_stimulus	p53	CREB	GRB2	MEK1_2	PI3K	PLCG
29	DNA_damage	EGFR_stimulus	FGFR3_stimulus	TGFBR_stimulus	p53	MSK	PKC	GRB2	MEK1_2	GAB1
30	DNA_damage	EGFR_stimulus	FGFR3_stimulus	TGFBR_stimulus	p53	MSK	PKC	GRB2	MEK1_2	PI3K
31	DNA_damage	EGFR_stimulus	FGFR3_stimulus	TGFBR_stimulus	p53	MSK	GRB2	MEK1_2	GAB1	PLCG
32	DNA_damage	EGFR_stimulus	FGFR3_stimulus	TGFBR_stimulus	p53	MSK	GRB2	MEK1_2	PI3K	PLCG
33	DNA_damage	EGFR_stimulus	FGFR3_stimulus	TGFBR_stimulus	p53	DUSP1	PKC	GRB2	MEK1_2	GAB1
34	DNA_damage	EGFR_stimulus	FGFR3_stimulus	TGFBR_stimulus	p53	DUSP1	PKC	GRB2	MEK1_2	PI3K
35	DNA_damage	EGFR_stimulus	FGFR3_stimulus	TGFBR_stimulus	p53	DUSP1	GRB2	MEK1_2	GAB1	PLCG
36	DNA_damage	EGFR_stimulus	FGFR3_stimulus	TGFBR_stimulus	p53	DUSP1	GRB2	MEK1_2	PI3K	PLCG
37	DNA_damage	EGFR_stimulus	FGFR3_stimulus	TGFBR_stimulus	p38	PKC	GRB2	MEK1_2	GAB1	MDM2
38	DNA_damage	EGFR_stimulus	FGFR3_stimulus	TGFBR_stimulus	p38	PKC	GRB2	MEK1_2	PI3K	MDM2
39	DNA_damage	EGFR_stimulus	FGFR3_stimulus	TGFBR_stimulus	p38	GRB2	MEK1_2	GAB1	MDM2	PLCG
40	DNA_damage	EGFR_stimulus	FGFR3_stimulus	TGFBR_stimulus	p38	GRB2	MEK1_2	PI3K	MDM2	PLCG

## Sheet: Results
Selected FVS
	DNA_damage	EGFR_stimulus	FGFR3_stimulus	TGFBR_stimulus	ERK	p53	p38	PKC	GRB2	GAB1
r9 and r10	1	0	0	1	0	1	1	1	1	1
Mutation	FVS
A desired attractor for r9(attractor 2)
AKT	AP1	Apoptosis	ATF2	ATM	BCL2	CREB	DNA_damage	DUSP1	EGFR	EGFR_stimulus	ELK1	ERK	FGFR3	FGFR3_stimulus	FOS	FOXO3	FRS2	GAB1	GADD45	GRB2	Growth_Arrest	JNK	JUN	MAP3K1_3	MAX	MDM2	MEK1_2	MSK	MTK1	MYC	p14	p21	p38	p53	p70	PDK1	PI3K	PKC	PLCG	PPP2CA	Proliferation	PTEN	RAF	RAS	RSK	SMAD	SOS	SPRY	TAK1
0	1	1	1	1	0	1	1	1	1	0	1	0	0	0	0	1	0	1	1	1	1	1	1	1	1	1	0	1	1	1	0	1	1	1	0	1	1	1	1	1	0	1	1	1	0	1	1	0	1
The application of FVS to r9
AKT	AP1	Apoptosis	ATF2	ATM	BCL2	CREB	DNA_damage	DUSP1	EGFR	EGFR_stimulus	ELK1	ERK	FGFR3	FGFR3_stimulus	FOS	FOXO3	FRS2	GAB1	GADD45	GRB2	Growth_Arrest	JNK	JUN	MAP3K1_3	MAX	MDM2	MEK1_2	MSK	MTK1	MYC	p14	p21	p38	p53	p70	PDK1	PI3K	PKC	PLCG	PPP2CA	Proliferation	PTEN	RAF	RAS	RSK	SMAD	SOS	SPRY	TAK1
0	1	1	1	1	0	1	1	1	1	0	1	0	0	0	0	1	0	1	1	1	1	1	1	1	1	1	0	1	1	1	0	1	1	1	0	1	1	1	1	1	0	1	1	1	0	1	1	0	1
A desired attractor for r10(attractor 21)
AKT	AP1	Apoptosis	ATF2	ATM	BCL2	CREB	DNA_damage	DUSP1	EGFR	EGFR_stimulus	ELK1	ERK	FGFR3	FGFR3_stimulus	FOS	FOXO3	FRS2	GAB1	GADD45	GRB2	Growth_Arrest	JNK	JUN	MAP3K1_3	MAX	MDM2	MEK1_2	MSK	MTK1	MYC	p14	p21	p38	p53	p70	PDK1	PI3K	PKC	PLCG	PPP2CA	Proliferation	PTEN	RAF	RAS	RSK	SMAD	SOS	SPRY	TAK1
0	1	1	1	1	0	1	1	1	0	0	1	0	1	0	0	1	0	1	1	1	1	1	1	1	1	1	0	1	1	1	0	1	1	1	0	1	1	1	1	1	0	1	1	1	0	1	1	0	1
The application of FVS to r10
AKT	AP1	Apoptosis	ATF2	ATM	BCL2	CREB	DNA_damage	DUSP1	EGFR	EGFR_stimulus	ELK1	ERK	FGFR3	FGFR3_stimulus	FOS	FOXO3	FRS2	GAB1	GADD45	GRB2	Growth_Arrest	JNK	JUN	MAP3K1_3	MAX	MDM2	MEK1_2	MSK	MTK1	MYC	p14	p21	p38	p53	p70	PDK1	PI3K	PKC	PLCG	PPP2CA	Proliferation	PTEN	RAF	RAS	RSK	SMAD	SOS	SPRY	TAK1
0	1	1	1	1	0	1	1	1	0	0	1	0	1	0	0	1	0	1	1	1	1	1	1	1	1	1	0	1	1	1	0	1	1	1	0	1	1	1	1	1	0	1	1	1	0	1	1	0	1
[truncated: 3 more columns]
