# Supplementary material for: Global Stabilization of Boolean Networks to Control the Heterogeneity of Cellular Responses
Source: Front Physiol. 2018 Jul 17;9:774. doi: 10.3389/fphys.2018.00774 (PMC6060448; doi:10.3389/fphys.2018.00774)
Supplement: Supplementary Dataset S2 — Results of the control kernel method for the MAPK signaling network. [file Data_Sheet_2.XLSX]

## Sheet: r9_CKs
	AKT	AP1	Apoptosis	ATF2	ATM	BCL2	CREB	DNA_damage	DUSP1	EGFR	EGFR_stimulus	ELK1	ERK	FGFR3	FGFR3_stimulus	FOS	FOXO3	FRS2	GAB1	GADD45	GRB2	Growth_Arrest	JNK	JUN	MAP3K1_3	MAX	MDM2	MEK1_2	MSK	MTK1	MYC	p14	p21	p38	p53	p70	PDK1	PI3K	PKC	PLCG	PPP2CA	Proliferation	PTEN	RAF	RAS	RSK	SMAD	SOS	SPRY
On['ATM']Off['AKT']	0	1	1	1	1	0	1	0.49726	1	1	0.49863	1	0	0	0.49924	0	1	0	1	1	1	1	1	1	1	1	1	0	1	1	1	0	1	1	1	0	1	1	1	1	1	0	1	1	1	0	0.50125	1	0
On[]Off['AKT','MDM2']	0	1	1	1	0.50237	0	1	0.50237	1	1	0.50116	1	0	0	0.49779	0	1	0	1	1	1	1	1	1	1	1	0	0	1	1	1	0	1	1	1	0	1	1	1	1	1	0	1	1	1	0	0.50235	1	0
On['p53']Off['AKT']	0	1	1	1	0.50274	0	1	0.50274	1	1	0.49894	1	0	0	0.49865	0	1	0	1	1	1	1	1	1	1	1	1	0	1	1	1	0	1	1	1	0	1	1	1	1	1	0	1	1	1	0	0.4989	1	0
On['ATM']Off['AP1']	0	0	1	1	1	0	1	0.50074	1	1	0.50086	1	0	0	0.49894	0	1	0	1	1	1	1	1	1	1	1	1	0	1	1	1	0	1	1	1	0	1	1	1	1	1	0	1	1	1	0	0.49936	1	0
On['AP1','ATM']Off[]	0	1	1	1	1	0	1	0.50003	1	1	0.49767	1	0	0	0.49968	0	1	0	1	1	1	1	1	1	1	1	1	0	1	1	1	0	1	1	1	0	1	1	1	1	1	0	1	1	1	0	0.50125	1	0
On[]Off['AP1','MDM2']	0	0	1	1	0.4994	0	1	0.4994	1	1	0.49863	1	0	0	0.50275	0	1	0	1	1	1	1	1	1	1	1	0	0	1	1	1	0	1	1	1	0	1	1	1	1	1	0	1	1	1	0	0.50259	1	0
On['AP1']Off['MDM2']	0	1	1	1	0.49948	0	1	0.49948	1	1	0.50007	1	0	0	0.5	0	1	0	1	1	1	1	1	1	1	1	0	0	1	1	1	0	1	1	1	0	1	1	1	1	1	0	1	1	1	0	0.50002	1	0
On['p53']Off['AP1']	0	0	1	1	0.50034	0	1	0.50034	1	1	0.5008	1	0	0	0.49912	0	1	0	1	1	1	1	1	1	1	1	1	0	1	1	1	0	1	1	1	0	1	1	1	1	1	0	1	1	1	0	0.49885	1	0
On['AP1','p53']Off[]	0	1	1	1	0.50246	0	1	0.50246	1	1	0.49686	1	0	0	0.50132	0	1	0	1	1	1	1	1	1	1	1	1	0	1	1	1	0	1	1	1	0	1	1	1	1	1	0	1	1	1	0	0.50073	1	0
On['ATM']Off['ATF2']	0	0	1	0	1	0	1	0.49986	1	1	0.49676	1	0	0	0.49727	0	1	0	1	1	1	1	1	1	1	1	1	0	1	1	1	0	1	1	1	0	1	1	1	1	1	0	1	1	1	0	0.50053	1	0
On['ATF2','ATM']Off[]	0	1	1	1	1	0	1	0.50137	1	1	0.50106	1	0	0	0.50165	0	1	0	1	1	1	1	1	1	1	1	1	0	1	1	1	0	1	1	1	0	1	1	1	1	1	0	1	1	1	0	0.50101	1	0
On['ATF2']Off['MDM2']	0	1	1	1	0.4989	0	1	0.4989	1	1	0.49894	1	0	0	0.5033	0	1	0	1	1	1	1	1	1	1	1	0	0	1	1	1	0	1	1	1	0	1	1	1	1	1	0	1	1	1	0	0.50187	1	0
On['p53']Off['ATF2']	0	0	1	0	0.50068	0	1	0.50068	1	1	0.4973	1	0	0	0.49584	0	1	0	1	1	1	1	1	1	1	1	1	0	1	1	1	0	1	1	1	0	1	1	1	1	1	0	1	1	1	0	0.50106	1	0
On['ATF2','p53']Off[]	0	1	1	1	0.50186	0	1	0.50186	1	1	0.49832	1	0	0	0.49858	0	1	0	1	1	1	1	1	1	1	1	1	0	1	1	1	0	1	1	1	0	1	1	1	1	1	0	1	1	1	0	0.50094	1	0
On['ATM']Off['BCL2']	0	1	1	1	1	0	1	0.49813	1	1	0.49903	1	0	0	0.49982	0	1	0	1	1	1	1	1	1	1	1	1	0	1	1	1	0	1	1	1	0	1	1	1	1	1	0	1	1	1	0	0.4997	1	0
On['ATM']Off['CREB']	0	1	1	1	1	0	0	0.50088	0	1	0.50108	1	0	0	0.49772	0	1	0	1	1	1	1	1	1	1	1	1	0	1	1	1	0	1	1	1	0	1	1	1	1	1	0	1	1	1	0	0.50166	1	0
On['ATM','CREB']Off[]	0	1	1	1	1	0	1	0.4982	1	1	0.49842	1	0	0	0.49849	0	1	0	1	1	1	1	1	1	1	1	1	0	1	1	1	0	1	1	1	0	1	1	1	1	1	0	1	1	1	0	0.5031	1	0
On['ATM']Off['DUSP1']	0	1	1	1	1	0	1	0.49881	0	1	0.49742	1	0	0	0.49959	0	1	0	1	1	1	1	1	1	1	1	1	0	1	1	1	0	1	1	1	0	1	1	1	1	1	0	1	1	1	0	0.49957	1	0
On['ATM','DUSP1']Off[]	0	1	1	1	1	0	1	0.50251	1	1	0.50335	1	0	0	0.4977	0	1	0	1	1	1	1	1	1	1	1	1	0	1	1	1	0	1	1	1	0	1	1	1	1	1	0	1	1	1	0	0.50036	1	0
On['ATM']Off['ELK1']	0	1	1	1	1	0	1	0.50162	1	1	0.49999	0	0	0	0.49982	0	1	0	1	1	1	1	1	1	1	1	1	0	1	1	1	0	1	1	1	0	1	1	1	1	1	0	1	1	1	0	0.49975	1	0
On['ATM','ELK1']Off[]	0	1	1	1	1	0	1	0.5015	1	1	0.50109	1	0	0	0.50102	0	1	0	1	1	1	1	1	1	1	1	1	0	1	1	1	0	1	1	1	0	1	1	1	1	1	0	1	1	1	0	0.50099	1	0
On['ATM']Off['ERK']	0	1	1	1	1	0	1	0.49944	1	1	0.49933	1	0	0	0.5006	0	1	0	1	1	1	1	1	1	1	1	1	0	1	1	1	0	1	1	1	0	1	1	1	1	1	0	1	1	1	0	0.49865	1	0
On['ATM']Off['FGFR3']	0	1	1	1	1	0	1	0.5012	1	1	0.49736	1	0	0	0.49886	0	1	0	1	1	1	1	1	1	1	1	1	0	1	1	1	0	1	1	1	0	1	1	1	1	1	0	1	1	1	0	0.50097	1	0
On['ATM','FGFR3']Off[]	0	1	1	1	1	0	1	0.50073	1	1	0.50194	1	0	1	0.49746	0	1	0	1	1	1	1	1	1	1	1	1	0	1	1	1	0	1	1	1	0	1	1	1	1	1	0	1	1	1	0	0.49902	1	0
On['ATM']Off['FOS']	0	1	1	1	1	0	1	0.50053	1	1	0.50157	1	0	0	0.49913	0	1	0	1	1	1	1	1	1	1	1	1	0	1	1	1	0	1	1	1	0	1	1	1	1	1	0	1	1	1	0	0.49946	1	0
On['ATM','FOS']Off[]	0	1	1	1	1	0	1	0.49896	1	1	0.49941	1	0	0	0.49947	1	1	0	1	1	1	1	1	1	1	1	1	0	1	1	1	0	1	1	1	0	1	1	1	1	1	0	1	1	1	0	0.49761	1	0
On['ATM','FOXO3']Off[]	0	1	1	1	1	0	1	0.50308	1	1	0.4997	1	0	0	0.50106	0	1	0	1	1	1	1	1	1	1	1	1	0	1	1	1	0	1	1	1	0	1	1	1	1	1	0	1	1	1	0	0.49839	1	0
On['ATM']Off['FRS2']	0	1	1	1	1	0	1	0.50122	1	1	0.50032	1	0	0	0.50067	0	1	0	1	1	1	1	1	1	1	1	1	0	1	1	1	0	1	1	1	0	1	1	1	1	1	0	1	1	1	0	0.50018	1	0
On['ATM','FRS2']Off[]	0	1	1	1	1	0	1	0.50038	1	1	0.4989	1	0	0	0.50134	0	1	1	1	1	1	1	1	1	1	1	1	0	1	1	1	0	1	1	1	0	1	1	1	1	1	0	1	1	1	0	0.50374	1	0
On['ATM']Off['GAB1']	0	1	1	1	1	0	1	0.50211	1	1	0.49921	1	0	0	0.49754	0	1	0	0	1	1	1	1	1	1	1	1	0	1	1	1	0	1	1	1	0	1	1	1	1	1	0	1	1	1	0	0.50044	1	0
On['ATM','GAB1']Off[]	0	1	1	1	1	0	1	0.49652	1	1	0.49939	1	0	0	0.49905	0	1	0	1	1	1	1	1	1	1	1	1	0	1	1	1	0	1	1	1	0	1	1	1	1	1	0	1	1	1	0	0.49891	1	0
On['ATM']Off['GADD45']	0	1	1	1	1	0	1	0.49852	1	1	0.49947	1	0	0	0.4983	0	1	0	1	0	1	1	1	1	1	1	1	0	1	0	1	0	1	1	1	0	1	1	1	1	1	0	1	1	1	0	0.49995	1	0
On['ATM','GADD45']Off[]	0	1	1	1	1	0	1	0.50019	1	1	0.50087	1	0	0	0.49814	0	1	0	1	1	1	1	1	1	1	1	1	0	1	1	1	0	1	1	1	0	1	1	1	1	1	0	1	1	1	0	0.50008	1	0
On['ATM','GRB2']Off[]	0	1	1	1	1	0	1	0.49738	1	1	0.49654	1	0	0	0.49953	0	1	0	1	1	1	1	1	1	1	1	1	0	1	1	1	0	1	1	1	0	1	1	1	1	1	0	1	1	1	0	0.50228	1	0
On['ATM','JNK']Off[]	0	1	1	1	1	0	1	0.4977	1	1	0.49961	1	0	0	0.49956	0	1	0	1	1	1	1	1	1	1	1	1	0	1	1	1	0	1	1	1	0	1	1	1	1	1	0	1	1	1	0	0.50014	1	0
On['ATM']Off['JUN']	0	0	1	1	1	0	1	0.4966	1	1	0.49967	1	0	0	0.49875	0	1	0	1	1	1	1	1	0	1	1	1	0	1	1	1	0	1	1	1	0	1	1	1	1	1	0	1	1	1	0	0.50011	1	0
On['ATM','JUN']Off[]	0	1	1	1	1	0	1	0.49534	1	1	0.49989	1	0	0	0.49985	0	1	0	1	1	1	1	1	1	1	1	1	0	1	1	1	0	1	1	1	0	1	1	1	1	1	0	1	1	1	0	0.4987	1	0
On['ATM']Off['MAP3K1_3']	0	1	1	1	1	0	1	0.49845	1	1	0.49832	1	0	0	0.49593	0	1	0	1	1	1	1	1	1	0	1	1	0	1	1	1	0	1	1	1	0	1	1	1	1	1	0	1	1	1	0	0.50029	1	0
On['ATM','MAP3K1_3']Off[]	0	1	1	1	1	0	1	0.50021	1	1	0.5002	1	0	0	0.50054	0	1	0	1	1	1	1	1	1	1	1	1	0	1	1	1	0	1	1	1	0	1	1	1	1	1	0	1	1	1	0	0.49733	1	0
On['ATM']Off['MAX']	0	1	1	1	1	0	1	0.50027	1	1	0.4986	1	0	0	0.49942	0	1	0	1	1	1	1	1	1	1	0	1	0	1	1	0	0	1	1	1	0	1	1	1	1	1	0	1	1	1	0	0.50118	1	0
On['ATM','MAX']Off[]	0	1	1	1	1	0	1	0.50073	1	1	0.49802	1	0	0	0.49787	0	1	0	1	1	1	1	1	1	1	1	1	0	1	1	1	0	1	1	1	0	1	1	1	1	1	0	1	1	1	0	0.49866	1	0
On['ATM']Off['MDM2']	0	1	1	1	1	0	1	0.49998	1	1	0.4991	1	0	0	0.50057	0	1	0	1	1	1	1	1	1	1	1	0	0	1	1	1	0	1	1	1	0	1	1	1	1	1	0	1	1	1	0	0.49912	1	0
On['ATM','MDM2']Off[]	0	1	1	1	1	0	1	0.49666	1	1	0.5031	1	0	0	0.49872	0	1	0	1	1	1	1	1	1	1	1	1	0	1	1	1	0	1	1	1	0	1	1	1	1	1	0	1	1	1	0	0.49603	1	0
On['ATM']Off['MEK1_2']	0	1	1	1	1	0	1	0.49937	1	1	0.49978	1	0	0	0.50028	0	1	0	1	1	1	1	1	1	1	1	1	0	1	1	1	0	1	1	1	0	1	1	1	1	1	0	1	1	1	0	0.4957	1	0
On['ATM']Off['MSK']	0	1	1	1	1	0	0	0.5009	0	1	0.50011	1	0	0	0.50054	0	1	0	1	1	1	1	1	1	1	1	1	0	0	1	0	0	1	1	1	0	1	1	1	1	1	0	1	1	1	0	0.49834	1	0
On['ATM','MSK']Off[]	0	1	1	1	1	0	1	0.49944	1	1	0.49927	1	0	0	0.4995	0	1	0	1	1	1	1	1	1	1	1	1	0	1	1	1	0	1	1	1	0	1	1	1	1	1	0	1	1	1	0	0.49744	1	0
On['ATM']Off['MTK1']	0	1	1	1	1	0	1	0.49861	1	1	0.50255	1	0	0	0.50049	0	1	0	1	1	1	1	1	1	1	1	1	0	1	0	1	0	1	1	1	0	1	1	1	1	1	0	1	1	1	0	0.50205	1	0
On['ATM','MTK1']Off[]	0	1	1	1	1	0	1	0.5014	1	1	0.49927	1	0	0	0.502	0	1	0	1	1	1	1	1	1	1	1	1	0	1	1	1	0	1	1	1	0	1	1	1	1	1	0	1	1	1	0	0.5045	1	0
On['ATM']Off['MYC']	0	1	1	1	1	0	1	0.50055	1	1	0.50042	1	0	0	0.49741	0	1	0	1	1	1	1	1	1	1	1	1	0	1	1	0	0	1	1	1	0	1	1	1	1	1	0	1	1	1	0	0.50115	1	0
On['ATM','MYC']Off[]	0	1	1	1	1	0	1	0.50209	1	1	0.50099	1	0	0	0.50302	0	1	0	1	1	1	1	1	1	1	1	1	0	1	1	1	0	1	1	1	0	1	1	1	1	1	0	1	1	1	0	0.50006	1	0
On['ATM','p21']Off[]	0	1	1	1	1	0	1	0.50086	1	1	0.50021	1	0	0	0.50102	0	1	0	1	1	1	1	1	1	1	1	1	0	1	1	1	0	1	1	1	0	1	1	1	1	1	0	1	1	1	0	0.5026	1	0
On['ATM','p38']Off[]	0	1	1	1	1	0	1	0.49821	1	1	0.49939	1	0	0	0.50043	0	1	0	1	1	1	1	1	1	1	1	1	0	1	1	1	0	1	1	1	0	1	1	1	1	1	0	1	1	1	0	0.50004	1	0
On['p53']Off['ATM']	0	1	1	1	0	0	1	0.49899	1	1	0.49956	1	0	0	0.50416	0	1	0	1	1	1	1	1	1	1	1	1	0	1	1	1	0	1	1	1	0	1	1	1	1	1	0	1	1	1	0	0.49945	1	0
On['ATM','p53']Off[]	0	1	1	1	1	0	1	0.49977	1	1	0.50326	1	0	0	0.50039	0	1	0	1	1	1	1	1	1	1	1	1	0	1	1	1	0	1	1	1	0	1	1	1	1	1	0	1	1	1	0	0.50308	1	0
On['ATM']Off['p70']	0	1	1	1	1	0	1	0.50083	1	1	0.49713	1	0	0	0.50126	0	1	0	1	1	1	1	1	1	1	1	1	0	1	1	1	0	1	1	1	0	1	1	1	1	1	0	1	1	1	0	0.50052	1	0
On['ATM','p70']Off[]	0	1	1	1	1	0	1	0.50184	1	1	0.50026	1	0	0	0.50183	0	1	0	1	1	1	1	1	1	1	1	1	0	1	1	1	0	1	1	1	1	1	1	1	1	1	0	1	1	1	0	0.49872	1	0
On['ATM']Off['PDK1']	0	1	1	1	1	0	1	0.49972	1	1	0.50215	1	0	0	0.49914	0	1	0	1	1	1	1	1	1	1	1	1	0	1	1	1	0	1	1	1	0	0	1	1	1	1	0	1	1	1	0	0.50136	1	0
On['ATM','PDK1']Off[]	0	1	1	1	1	0	1	0.50152	1	1	0.4985	1	0	0	0.50097	0	1	0	1	1	1	1	1	1	1	1	1	0	1	1	1	0	1	1	1	0	1	1	1	1	1	0	1	1	1	0	0.49861	1	0
On['ATM']Off['PI3K']	0	1	1	1	1	0	1	0.49857	1	1	0.49722	1	0	0	0.50104	0	1	0	1	1	1	1	1	1	1	1	1	0	1	1	1	0	1	1	1	0	0	0	1	1	1	0	1	1	1	0	0.49939	1	0
On['ATM','PI3K']Off[]	0	1	1	1	1	0	1	0.49845	1	1	0.50222	1	0	0	0.4998	0	1	0	1	1	1	1	1	1	1	1	1	0	1	1	1	0	1	1	1	0	1	1	1	1	1	0	1	1	1	0	0.50196	1	0
On['ATM']Off['PKC']	0	1	1	1	1	0	1	0.50172	1	1	0.50253	1	0	0	0.49826	0	1	0	1	1	1	1	1	1	1	1	1	0	1	1	1	0	1	1	1	0	1	1	0	1	1	0	1	1	1	0	0.4993	1	0
On['ATM','PKC']Off[]	0	1	1	1	1	0	1	0.50097	1	1	0.50215	1	0	0	0.49917	0	1	0	1	1	1	1	1	1	1	1	1	0	1	1	1	0	1	1	1	0	1	1	1	1	1	0	1	1	1	0	0.49934	1	0
On['ATM']Off['PLCG']	0	1	1	1	1	0	1	0.5004	1	1	0.50057	1	0	0	0.50116	0	1	0	1	1	1	1	1	1	1	1	1	0	1	1	1	0	1	1	1	0	1	1	0	0	1	0	1	1	1	0	0.50014	1	0
On['ATM','PLCG']Off[]	0	1	1	1	1	0	1	0.4988	1	1	0.50033	1	0	0	0.50158	0	1	0	1	1	1	1	1	1	1	1	1	0	1	1	1	0	1	1	1	0	1	1	1	1	1	0	1	1	1	0	0.50028	1	0
On['ATM']Off['PPP2CA']	0	1	1	1	1	0	1	0.49868	1	1	0.49763	1	0	0	0.50072	0	1	0	1	1	1	1	1	1	1	1	1	0	1	1	1	0	1	1	1	0	1	1	1	1	0	0	1	1	1	0	0.5	1	0
On['ATM','PPP2CA']Off[]	0	1	1	1	1	0	1	0.50444	1	1	0.49951	1	0	0	0.49913	0	1	0	1	1	1	1	1	1	1	1	1	0	1	1	1	0	1	1	1	0	1	1	1	1	1	0	1	1	1	0	0.50109	1	0
On['ATM','PTEN']Off[]	0	1	1	1	1	0	1	0.49855	1	1	0.49999	1	0	0	0.50274	0	1	0	1	1	1	1	1	1	1	1	1	0	1	1	1	0	1	1	1	0	1	1	1	1	1	0	1	1	1	0	0.50233	1	0
On['ATM']Off['RAF']	0	1	1	1	1	0	1	0.4996	1	1	0.50386	1	0	0	0.49986	0	1	0	1	1	1	1	1	1	1	1	1	0	1	1	1	0	1	1	1	0	1	1	1	1	1	0	1	0	1	0	0.49968	1	0
On['ATM','RAF']Off[]	0	1	1	1	1	0	1	0.49993	1	1	0.50037	1	0	0	0.49904	0	1	0	1	1	1	1	1	1	1	1	1	0	1	1	1	0	1	1	1	0	1	1	1	1	1	0	1	1	1	0	0.50122	1	0
On['ATM']Off['RAS']	0	1	1	1	1	0	1	0.50205	1	1	0.50119	1	0	0	0.49781	0	1	0	1	1	1	1	1	1	0	1	1	0	1	1	1	0	1	1	1	0	1	1	1	1	1	0	1	1	0	0	0.49962	1	0
On['ATM','RAS']Off[]	0	1	1	1	1	0	1	0.5	1	1	0.49898	1	0	0	0.50011	0	1	0	1	1	1	1	1	1	1	1	1	0	1	1	1	0	1	1	1	0	1	1	1	1	1	0	1	1	1	0	0.49858	1	0
On['ATM']Off['RSK']	0	1	1	1	1	0	1	0.50096	1	1	0.49823	1	0	0	0.4998	0	1	0	1	1	1	1	1	1	1	1	1	0	1	1	1	0	1	1	1	0	1	1	1	1	1	0	1	1	1	0	0.4985	1	0
On['ATM','RSK']Off[]	0	1	1	1	1	0	1	0.50084	1	1	0.50207	1	0	0	0.49832	0	1	0	1	1	1	1	1	1	1	1	1	0	1	1	1	0	1	1	1	0	1	1	1	1	1	0	1	1	1	1	0.49985	0	0
On['ATM']Off['SMAD']	0	1	1	1	1	0	1	0.50012	1	1	0.50188	1	0	0	0.49854	0	1	0	1	1	1	1	1	1	1	1	1	0	1	1	1	0	1	1	1	0	1	1	1	1	1	0	1	1	1	0	0	1	0
On['ATM','SMAD']Off[]	0	1	1	1	1	0	1	0.50226	1	1	0.50015	1	0	0	0.49993	0	1	0	1	1	1	1	1	1	1	1	1	0	1	1	1	0	1	1	1	0	1	1	1	1	1	0	1	1	1	0	1	1	0
On['ATM']Off['SOS']	0	1	1	1	1	0	1	0.50043	1	1	0.50171	1	0	0	0.50068	0	1	0	1	1	1	1	1	1	1	1	1	0	1	1	1	0	1	1	1	0	1	1	1	1	1	0	1	1	1	0	0.50029	0	0
On['ATM','SOS']Off[]	0	1	1	1	1	0	1	0.50228	1	1	0.4993	1	0	0	0.49729	0	1	0	1	1	1	1	1	1	1	1	1	0	1	1	1	0	1	1	1	0	1	1	1	1	1	0	1	1	1	0	0.50082	1	0
On['ATM']Off['SPRY']	0	1	1	1	1	0	1	0.50085	1	1	0.49804	1	0	0	0.50007	0	1	0	1	1	1	1	1	1	1	1	1	0	1	1	1	0	1	1	1	0	1	1	1	1	1	0	1	1	1	0	0.49909	1	0
On['ATM','SPRY']Off[]	0	1	1	1	1	0	1	0.50165	1	1	0.50109	1	0	0	0.49967	0	1	0	1	1	1	1	1	1	1	1	1	0	1	1	1	0	1	1	1	0	1	1	1	1	1	0	1	1	1	0	0.50177	1	1
On['ATM']Off['TAK1']	0	1	1	1	1	0	1	0.502	1	1	0.49898	1	0	0	0.50333	0	1	0	1	1	1	1	1	1	1	1	1	0	1	1	1	0	1	1	1	0	1	1	1	1	1	0	1	1	1	0	0.50158	1	0
On['ATM','TAK1']Off[]	0	1	1	1	1	0	1	0.50114	1	1	0.50049	1	0	0	0.50147	0	1	0	1	1	1	1	1	1	1	1	1	0	1	1	1	0	1	1	1	0	1	1	1	1	1	0	1	1	1	0	0.49894	1	0
On['ATM']Off['TAOK']	0	1	1	1	1	0	1	0.50189	1	1	0.49969	1	0	0	0.50035	0	1	0	1	1	1	1	1	1	1	1	1	0	1	1	1	0	1	1	1	0	1	1	1	1	1	0	1	1	1	0	0.50149	1	0
On['ATM','TAOK']Off[]	0	1	1	1	1	0	1	0.5002	1	1	0.49897	1	0	0	0.49892	0	1	0	1	1	1	1	1	1	1	1	1	0	1	1	1	0	1	1	1	0	1	1	1	1	1	0	1	1	1	0	0.49993	1	0
On['ATM']Off['TGFBR']	0	1	1	1	1	0	1	0.50193	1	1	0.50079	1	0	0	0.49932	0	1	0	1	1	1	1	1	1	1	1	1	0	1	1	1	0	1	1	1	0	1	1	1	1	1	0	1	1	1	0	0	1	0
On['ATM','TGFBR']Off[]	0	1	1	1	1	0	1	0.50091	1	1	0.49994	1	0	0	0.50108	0	1	0	1	1	1	1	1	1	1	1	1	0	1	1	1	0	1	1	1	0	1	1	1	1	1	0	1	1	1	0	1	1	0
On[]Off['BCL2','MDM2']	0	1	1	1	0.49981	0	1	0.49981	1	1	0.50125	1	0	0	0.49977	0	1	0	1	1	1	1	1	1	1	1	0	0	1	1	1	0	1	1	1	0	1	1	1	1	1	0	1	1	1	0	0.50206	1	0
On['p53']Off['BCL2']	0	1	1	1	0.50092	0	1	0.50092	1	1	0.49936	1	0	0	0.49858	0	1	0	1	1	1	1	1	1	1	1	1	0	1	1	1	0	1	1	1	0	1	1	1	1	1	0	1	1	1	0	0.50107	1	0
On[]Off['CREB','MDM2']	0	1	1	1	0.50114	0	0	0.50114	0	1	0.50212	1	0	0	0.49862	0	1	0	1	1	1	1	1	1	1	1	0	0	1	1	1	0	1	1	1	0	1	1	1	1	1	0	1	1	1	0	0.49931	1	0
On['p53']Off['CREB']	0	1	1	1	0.49915	0	0	0.49915	0	1	0.50068	1	0	0	0.5006	0	1	0	1	1	1	1	1	1	1	1	1	0	1	1	1	0	1	1	1	0	1	1	1	1	1	0	1	1	1	0	0.50136	1	0
On['CREB','p53']Off[]	0	1	1	1	0.49784	0	1	0.49784	1	1	0.49884	1	0	0	0.49998	0	1	0	1	1	1	1	1	1	1	1	1	0	1	1	1	0	1	1	1	0	1	1	1	1	1	0	1	1	1	0	0.50124	1	0
On[]Off['DUSP1','MDM2']	0	1	1	1	0.50223	0	1	0.50223	0	1	0.50035	1	0	0	0.49918	0	1	0	1	1	1	1	1	1	1	1	0	0	1	1	1	0	1	1	1	0	1	1	1	1	1	0	1	1	1	0	0.50007	1	0
On['p53']Off['DUSP1']	0	1	1	1	0.49727	0	1	0.49727	0	1	0.50022	1	0	0	0.50073	0	1	0	1	1	1	1	1	1	1	1	1	0	1	1	1	0	1	1	1	0	1	1	1	1	1	0	1	1	1	0	0.4974	1	0
On['DUSP1','p53']Off[]	0	1	1	1	0.5026	0	1	0.5026	1	1	0.49871	1	0	0	0.4984	0	1	0	1	1	1	1	1	1	1	1	1	0	1	1	1	0	1	1	1	0	1	1	1	1	1	0	1	1	1	0	0.50068	1	0
On[]Off['ELK1','MDM2']	0	1	1	1	0.49923	0	1	0.49923	1	1	0.50017	0	0	0	0.50007	0	1	0	1	1	1	1	1	1	1	1	0	0	1	1	1	0	1	1	1	0	1	1	1	1	1	0	1	1	1	0	0.49814	1	0
On['ELK1']Off['MDM2']	0	1	1	1	0.50113	0	1	0.50113	1	1	0.5019	1	0	0	0.50047	0	1	0	1	1	1	1	1	1	1	1	0	0	1	1	1	0	1	1	1	0	1	1	1	1	1	0	1	1	1	0	0.49849	1	0
On['p53']Off['ELK1']	0	1	1	1	0.49988	0	1	0.49988	1	1	0.50315	0	0	0	0.50253	0	1	0	1	1	1	1	1	1	1	1	1	0	1	1	1	0	1	1	1	0	1	1	1	1	1	0	1	1	1	0	0.49966	1	0
On['ELK1','p53']Off[]	0	1	1	1	0.50374	0	1	0.50374	1	1	0.50185	1	0	0	0.49853	0	1	0	1	1	1	1	1	1	1	1	1	0	1	1	1	0	1	1	1	0	1	1	1	1	1	0	1	1	1	0	0.49834	1	0
On[]Off['ERK','MDM2']	0	1	1	1	0.50264	0	1	0.50264	1	1	0.50036	1	0	0	0.5003	0	1	0	1	1	1	1	1	1	1	1	0	0	1	1	1	0	1	1	1	0	1	1	1	1	1	0	1	1	1	0	0.50273	1	0
On['p53']Off['ERK']	0	1	1	1	0.4999	0	1	0.4999	1	1	0.49923	1	0	0	0.5008	0	1	0	1	1	1	1	1	1	1	1	1	0	1	1	1	0	1	1	1	0	1	1	1	1	1	0	1	1	1	0	0.50039	1	0
On[]Off['FGFR3','MDM2']	0	1	1	1	0.49947	0	1	0.49947	1	1	0.50127	1	0	0	0.49683	0	1	0	1	1	1	1	1	1	1	1	0	0	1	1	1	0	1	1	1	0	1	1	1	1	1	0	1	1	1	0	0.50022	1	0
On['FGFR3']Off['MDM2']	0	1	1	1	0.49975	0	1	0.49975	1	1	0.49882	1	0	1	0.49892	0	1	0	1	1	1	1	1	1	1	1	0	0	1	1	1	0	1	1	1	0	1	1	1	1	1	0	1	1	1	0	0.49863	1	0
On['p53']Off['FGFR3']	0	1	1	1	0.50272	0	1	0.50272	1	1	0.50187	1	0	0	0.50133	0	1	0	1	1	1	1	1	1	1	1	1	0	1	1	1	0	1	1	1	0	1	1	1	1	1	0	1	1	1	0	0.50189	1	0
On['FGFR3','p53']Off[]	0	1	1	1	0.49995	0	1	0.49995	1	1	0.49778	1	0	1	0.49784	0	1	0	1	1	1	1	1	1	1	1	1	0	1	1	1	0	1	1	1	0	1	1	1	1	1	0	1	1	1	0	0.50144	1	0
On[]Off['FOS','MDM2']	0	1	1	1	0.50089	0	1	0.50089	1	1	0.50116	1	0	0	0.50146	0	1	0	1	1	1	1	1	1	1	1	0	0	1	1	1	0	1	1	1	0	1	1	1	1	1	0	1	1	1	0	0.49972	1	0
On['p53']Off['FOS']	0	1	1	1	0.50273	0	1	0.50273	1	1	0.49977	1	0	0	0.50037	0	1	0	1	1	1	1	1	1	1	1	1	0	1	1	1	0	1	1	1	0	1	1	1	1	1	0	1	1	1	0	0.49871	1	0
On['FOS','p53']Off[]	0	1	1	1	0.49999	0	1	0.49999	1	1	0.49852	1	0	0	0.49973	1	1	0	1	1	1	1	1	1	1	1	1	0	1	1	1	0	1	1	1	0	1	1	1	1	1	0	1	1	1	0	0.49824	1	0
On['FOXO3']Off['MDM2']	0	1	1	1	0.50006	0	1	0.50006	1	1	0.50051	1	0	0	0.50038	0	1	0	1	1	1	1	1	1	1	1	0	0	1	1	1	0	1	1	1	0	1	1	1	1	1	0	1	1	1	0	0.49934	1	0
On['FOXO3','p53']Off[]	0	1	1	1	0.49902	0	1	0.49902	1	1	0.50307	1	0	0	0.50045	0	1	0	1	1	1	1	1	1	1	1	1	0	1	1	1	0	1	1	1	0	1	1	1	1	1	0	1	1	1	0	0.49944	1	0
On['FRS2']Off['MDM2']	0	1	1	1	0.50113	0	1	0.50113	1	1	0.50009	1	0	0	0.50339	0	1	1	1	1	1	1	1	1	1	1	0	0	1	1	1	0	1	1	1	0	1	1	1	1	1	0	1	1	1	0	0.49963	1	0
On['p53']Off['FRS2']	0	1	1	1	0.50137	0	1	0.50137	1	1	0.49939	1	0	0	0.5012	0	1	0	1	1	1	1	1	1	1	1	1	0	1	1	1	0	1	1	1	0	1	1	1	1	1	0	1	1	1	0	0.50089	1	0
On['FRS2','p53']Off[]	0	1	1	1	0.49795	0	1	0.49795	1	1	0.49969	1	0	0	0.50157	0	1	1	1	1	1	1	1	1	1	1	1	0	1	1	1	0	1	1	1	0	1	1	1	1	1	0	1	1	1	0	0.49962	1	0
On[]Off['GAB1','MDM2']	0	1	1	1	0.50033	0	1	0.50033	1	1	0.49937	1	0	0	0.49744	0	1	0	0	1	1	1	1	1	1	1	0	0	1	1	1	0	1	1	1	0	1	1	1	1	1	0	1	1	1	0	0.49738	1	0
On['GAB1']Off['MDM2']	0	1	1	1	0.50041	0	1	0.50041	1	1	0.49902	1	0	0	0.49718	0	1	0	1	1	1	1	1	1	1	1	0	0	1	1	1	0	1	1	1	0	1	1	1	1	1	0	1	1	1	0	0.50174	1	0
On['p53']Off['GAB1']	0	1	1	1	0.49862	0	1	0.49862	1	1	0.49977	1	0	0	0.49976	0	1	0	0	1	1	1	1	1	1	1	1	0	1	1	1	0	1	1	1	0	1	1	1	1	1	0	1	1	1	0	0.50017	1	0
On['GAB1','p53']Off[]	0	1	1	1	0.49793	0	1	0.49793	1	1	0.49902	1	0	0	0.49988	0	1	0	1	1	1	1	1	1	1	1	1	0	1	1	1	0	1	1	1	0	1	1	1	1	1	0	1	1	1	0	0.50041	1	0
On['GADD45']Off['MDM2']	0	1	1	1	0.50068	0	1	0.50068	1	1	0.50188	1	0	0	0.49988	0	1	0	1	1	1	1	1	1	1	1	0	0	1	1	1	0	1	1	1	0	1	1	1	1	1	0	1	1	1	0	0.4982	1	0
On['GADD45','p53']Off[]	0	1	1	1	0.50043	0	1	0.50043	1	1	0.5	1	0	0	0.49775	0	1	0	1	1	1	1	1	1	1	1	1	0	1	1	1	0	1	1	1	0	1	1	1	1	1	0	1	1	1	0	0.50286	1	0
On['GRB2']Off['MDM2']	0	1	1	1	0.49868	0	1	0.49868	1	1	0.50097	1	0	0	0.49895	0	1	0	1	1	1	1	1	1	1	1	0	0	1	1	1	0	1	1	1	0	1	1	1	1	1	0	1	1	1	0	0.50092	1	0
On['GRB2','p53']Off[]	0	1	1	1	0.49669	0	1	0.49669	1	1	0.49898	1	0	0	0.49966	0	1	0	1	1	1	1	1	1	1	1	1	0	1	1	1	0	1	1	1	0	1	1	1	1	1	0	1	1	1	0	0.50245	1	0
On['JNK']Off['MDM2']	0	1	1	1	0.49967	0	1	0.49967	1	1	0.49915	1	0	0	0.49921	0	1	0	1	1	1	1	1	1	1	1	0	0	1	1	1	0	1	1	1	0	1	1	1	1	1	0	1	1	1	0	0.50054	1	0
On['JNK','p53']Off[]	0	1	1	1	0.49883	0	1	0.49883	1	1	0.50007	1	0	0	0.49939	0	1	0	1	1	1	1	1	1	1	1	1	0	1	1	1	0	1	1	1	0	1	1	1	1	1	0	1	1	1	0	0.50212	1	0
On[]Off['JUN','MDM2']	0	0	1	1	0.49981	0	1	0.49981	1	1	0.49477	1	0	0	0.50191	0	1	0	1	1	1	1	1	0	1	1	0	0	1	1	1	0	1	1	1	0	1	1	1	1	1	0	1	1	1	0	0.50193	1	0
On['JUN']Off['MDM2']	0	1	1	1	0.50279	0	1	0.50279	1	1	0.49673	1	0	0	0.49846	0	1	0	1	1	1	1	1	1	1	1	0	0	1	1	1	0	1	1	1	0	1	1	1	1	1	0	1	1	1	0	0.50012	1	0
On['p53']Off['JUN']	0	0	1	1	0.50089	0	1	0.50089	1	1	0.49755	1	0	0	0.49724	0	1	0	1	1	1	1	1	0	1	1	1	0	1	1	1	0	1	1	1	0	1	1	1	1	1	0	1	1	1	0	0.49785	1	0
On['JUN','p53']Off[]	0	1	1	1	0.50026	0	1	0.50026	1	1	0.50048	1	0	0	0.50167	0	1	0	1	1	1	1	1	1	1	1	1	0	1	1	1	0	1	1	1	0	1	1	1	1	1	0	1	1	1	0	0.50112	1	0
On['MAP3K1_3','p53']Off[]	0	1	1	1	0.50035	0	1	0.50035	1	1	0.50116	1	0	0	0.50314	0	1	0	1	1	1	1	1	1	1	1	1	0	1	1	1	0	1	1	1	0	1	1	1	1	1	0	1	1	1	0	0.49879	1	0
On[]Off['MAX','MDM2']	0	1	1	1	0.50149	0	1	0.50149	1	1	0.49899	1	0	0	0.50159	0	1	0	1	1	1	1	1	1	1	0	0	0	1	1	0	0	1	1	1	0	1	1	1	1	1	0	1	1	1	0	0.5003	1	0
On['MAX']Off['MDM2']	0	1	1	1	0.4995	0	1	0.4995	1	1	0.49903	1	0	0	0.49985	0	1	0	1	1	1	1	1	1	1	1	0	0	1	1	1	0	1	1	1	0	1	1	1	1	1	0	1	1	1	0	0.50063	1	0
On['p53']Off['MAX']	0	1	1	1	0.50076	0	1	0.50076	1	1	0.50077	1	0	0	0.49948	0	1	0	1	1	1	1	1	1	1	0	1	0	1	1	0	0	1	1	1	0	1	1	1	1	1	0	1	1	1	0	0.49917	1	0
On['MAX','p53']Off[]	0	1	1	1	0.50147	0	1	0.50147	1	1	0.50149	1	0	0	0.49878	0	1	0	1	1	1	1	1	1	1	1	1	0	1	1	1	0	1	1	1	0	1	1	1	1	1	0	1	1	1	0	0.50123	1	0
On[]Off['MDM2','MEK1_2']	0	1	1	1	0.49987	0	1	0.49987	1	1	0.50103	1	0	0	0.50031	0	1	0	1	1	1	1	1	1	1	1	0	0	1	1	1	0	1	1	1	0	1	1	1	1	1	0	1	1	1	0	0.49997	1	0
On[]Off['MDM2','MSK']	0	1	1	1	0.50095	0	0	0.50095	0	1	0.49967	1	0	0	0.50067	0	1	0	1	1	1	1	1	1	1	1	0	0	0	1	0	0	1	1	1	0	1	1	1	1	1	0	1	1	1	0	0.50068	1	0
On['MTK1']Off['MDM2']	0	1	1	1	0.49797	0	1	0.49797	1	1	0.49898	1	0	0	0.49531	0	1	0	1	1	1	1	1	1	1	1	0	0	1	1	1	0	1	1	1	0	1	1	1	1	1	0	1	1	1	0	0.50034	1	0
On[]Off['MDM2','MYC']	0	1	1	1	0.50032	0	1	0.50032	1	1	0.49889	1	0	0	0.50059	0	1	0	1	1	1	1	1	1	1	1	0	0	1	1	0	0	1	1	1	0	1	1	1	1	1	0	1	1	1	0	0.49967	1	0
On['MYC']Off['MDM2']	0	1	1	1	0.49894	0	1	0.49894	1	1	0.50305	1	0	0	0.50056	0	1	0	1	1	1	1	1	1	1	1	0	0	1	1	1	0	1	1	1	0	1	1	1	1	1	0	1	1	1	0	0.49878	1	0
On['p21']Off['MDM2']	0	1	1	1	0.49683	0	1	0.49683	1	1	0.4962	1	0	0	0.50085	0	1	0	1	1	1	1	1	1	1	1	0	0	1	1	1	0	1	1	1	0	1	1	1	1	1	0	1	1	1	0	0.49835	1	0
On['p38']Off['MDM2']	0	1	1	1	0.50121	0	1	0.50121	1	1	0.49742	1	0	0	0.50191	0	1	0	1	1	1	1	1	1	1	1	0	0	1	1	1	0	1	1	1	0	1	1	1	1	1	0	1	1	1	0	0.50008	1	0
On['p53']Off['MDM2']	0	1	1	1	0.50264	0	1	0.50264	1	1	0.50053	1	0	0	0.50007	0	1	0	1	1	1	1	1	1	1	1	0	0	1	1	1	0	1	1	1	0	1	1	1	1	1	0	1	1	1	0	0.5014	1	0
On['MDM2','p53']Off[]	0	1	1	1	0.49851	0	1	0.49851	1	1	0.49924	1	0	0	0.50169	0	1	0	1	1	1	1	1	1	1	1	1	0	1	1	1	0	1	1	1	0	1	1	1	1	1	0	1	1	1	0	0.49823	1	0
On[]Off['MDM2','p70']	0	1	1	1	0.49724	0	1	0.49724	1	1	0.50036	1	0	0	0.49914	0	1	0	1	1	1	1	1	1	1	1	0	0	1	1	1	0	1	1	1	0	1	1	1	1	1	0	1	1	1	0	0.49984	1	0
On['p70']Off['MDM2']	0	1	1	1	0.50079	0	1	0.50079	1	1	0.50101	1	0	0	0.49978	0	1	0	1	1	1	1	1	1	1	1	0	0	1	1	1	0	1	1	1	1	1	1	1	1	1	0	1	1	1	0	0.50019	1	0
On[]Off['MDM2','PDK1']	0	1	1	1	0.49987	0	1	0.49987	1	1	0.5022	1	0	0	0.49763	0	1	0	1	1	1	1	1	1	1	1	0	0	1	1	1	0	1	1	1	0	0	1	1	1	1	0	1	1	1	0	0.50178	1	0
On['PDK1']Off['MDM2']	0	1	1	1	0.49989	0	1	0.49989	1	1	0.50083	1	0	0	0.50061	0	1	0	1	1	1	1	1	1	1	1	0	0	1	1	1	0	1	1	1	0	1	1	1	1	1	0	1	1	1	0	0.49999	1	0
On[]Off['MDM2','PI3K']	0	1	1	1	0.50063	0	1	0.50063	1	1	0.49901	1	0	0	0.49742	0	1	0	1	1	1	1	1	1	1	1	0	0	1	1	1	0	1	1	1	0	0	0	1	1	1	0	1	1	1	0	0.50234	1	0
On['PI3K']Off['MDM2']	0	1	1	1	0.49794	0	1	0.49794	1	1	0.49839	1	0	0	0.49881	0	1	0	1	1	1	1	1	1	1	1	0	0	1	1	1	0	1	1	1	0	1	1	1	1	1	0	1	1	1	0	0.49885	1	0
On[]Off['MDM2','PKC']	0	1	1	1	0.50141	0	1	0.50141	1	1	0.50145	1	0	0	0.49863	0	1	0	1	1	1	1	1	1	1	1	0	0	1	1	1	0	1	1	1	0	1	1	0	1	1	0	1	1	1	0	0.50244	1	0
On['PKC']Off['MDM2']	0	1	1	1	0.49948	0	1	0.49948	1	1	0.50021	1	0	0	0.50171	0	1	0	1	1	1	1	1	1	1	1	0	0	1	1	1	0	1	1	1	0	1	1	1	1	1	0	1	1	1	0	0.50022	1	0
On['PLCG']Off['MDM2']	0	1	1	1	0.49956	0	1	0.49956	1	1	0.50182	1	0	0	0.5016	0	1	0	1	1	1	1	1	1	1	1	0	0	1	1	1	0	1	1	1	0	1	1	1	1	1	0	1	1	1	0	0.50091	1	0
On['PPP2CA']Off['MDM2']	0	1	1	1	0.50103	0	1	0.50103	1	1	0.49921	1	0	0	0.50258	0	1	0	1	1	1	1	1	1	1	1	0	0	1	1	1	0	1	1	1	0	1	1	1	1	1	0	1	1	1	0	0.50033	1	0
On['PTEN']Off['MDM2']	0	1	1	1	0.50092	0	1	0.50092	1	1	0.49773	1	0	0	0.49871	0	1	0	1	1	1	1	1	1	1	1	0	0	1	1	1	0	1	1	1	0	1	1	1	1	1	0	1	1	1	0	0.49961	1	0
On[]Off['MDM2','RAF']	0	1	1	1	0.49919	0	1	0.49919	1	1	0.50126	1	0	0	0.49984	0	1	0	1	1	1	1	1	1	1	1	0	0	1	1	1	0	1	1	1	0	1	1	1	1	1	0	1	0	1	0	0.49818	1	0
On['RAF']Off['MDM2']	0	1	1	1	0.50201	0	1	0.50201	1	1	0.49879	1	0	0	0.49721	0	1	0	1	1	1	1	1	1	1	1	0	0	1	1	1	0	1	1	1	0	1	1	1	1	1	0	1	1	1	0	0.50053	1	0
On['RAS']Off['MDM2']	0	1	1	1	0.50073	0	1	0.50073	1	1	0.50046	1	0	0	0.50384	0	1	0	1	1	1	1	1	1	1	1	0	0	1	1	1	0	1	1	1	0	1	1	1	1	1	0	1	1	1	0	0.4984	1	0
On[]Off['MDM2','RSK']	0	1	1	1	0.50042	0	1	0.50042	1	1	0.49897	1	0	0	0.50274	0	1	0	1	1	1	1	1	1	1	1	0	0	1	1	1	0	1	1	1	0	1	1	1	1	1	0	1	1	1	0	0.4992	1	0
On['RSK']Off['MDM2']	0	1	1	1	0.49962	0	1	0.49962	1	1	0.49858	1	0	0	0.49856	0	1	0	1	1	1	1	1	1	1	1	0	0	1	1	1	0	1	1	1	0	1	1	1	1	1	0	1	1	1	1	0.5001	0	0
On[]Off['MDM2','SMAD']	0	1	1	1	0.50141	0	1	0.50141	1	1	0.50161	1	0	0	0.4987	0	1	0	1	1	1	1	1	1	1	1	0	0	1	1	1	0	1	1	1	0	1	1	1	1	1	0	1	1	1	0	0	1	0
On['SMAD']Off['MDM2']	0	1	1	1	0.50101	0	1	0.50101	1	1	0.50248	1	0	0	0.49865	0	1	0	1	1	1	1	1	1	1	1	0	0	1	1	1	0	1	1	1	0	1	1	1	1	1	0	1	1	1	0	1	1	0
On[]Off['MDM2','SOS']	0	1	1	1	0.5	0	1	0.5	1	1	0.49992	1	0	0	0.50038	0	1	0	1	1	1	1	1	1	1	1	0	0	1	1	1	0	1	1	1	0	1	1	1	1	1	0	1	1	1	0	0.49938	0	0
On['SOS']Off['MDM2']	0	1	1	1	0.5019	0	1	0.5019	1	1	0.50399	1	0	0	0.49899	0	1	0	1	1	1	1	1	1	1	1	0	0	1	1	1	0	1	1	1	0	1	1	1	1	1	0	1	1	1	0	0.50233	1	0
On[]Off['MDM2','SPRY']	0	1	1	1	0.50243	0	1	0.50243	1	1	0.50119	1	0	0	0.49887	0	1	0	1	1	1	1	1	1	1	1	0	0	1	1	1	0	1	1	1	0	1	1	1	1	1	0	1	1	1	0	0.50142	1	0
On['SPRY']Off['MDM2']	0	1	1	1	0.50103	0	1	0.50103	1	1	0.5001	1	0	0	0.49876	0	1	0	1	1	1	1	1	1	1	1	0	0	1	1	1	0	1	1	1	0	1	1	1	1	1	0	1	1	1	0	0.50067	1	1
On[]Off['MDM2','TAK1']	0	1	1	1	0.50201	0	1	0.50201	1	1	0.49794	1	0	0	0.50028	0	1	0	1	1	1	1	1	1	1	1	0	0	1	1	1	0	1	1	1	0	1	1	1	1	1	0	1	1	1	0	0.50199	1	0
On['TAK1']Off['MDM2']	0	1	1	1	0.50181	0	1	0.50181	1	1	0.5015	1	0	0	0.50123	0	1	0	1	1	1	1	1	1	1	1	0	0	1	1	1	0	1	1	1	0	1	1	1	1	1	0	1	1	1	0	0.49887	1	0
On[]Off['MDM2','TAOK']	0	1	1	1	0.50014	0	1	0.50014	1	1	0.49783	1	0	0	0.50152	0	1	0	1	1	1	1	1	1	1	1	0	0	1	1	1	0	1	1	1	0	1	1	1	1	1	0	1	1	1	0	0.50014	1	0
On['TAOK']Off['MDM2']	0	1	1	1	0.50118	0	1	0.50118	1	1	0.50167	1	0	0	0.50035	0	1	0	1	1	1	1	1	1	1	1	0	0	1	1	1	0	1	1	1	0	1	1	1	1	1	0	1	1	1	0	0.50151	1	0
On[]Off['MDM2','TGFBR']	0	1	1	1	0.50055	0	1	0.50055	1	1	0.50093	1	0	0	0.5034	0	1	0	1	1	1	1	1	1	1	1	0	0	1	1	1	0	1	1	1	0	1	1	1	1	1	0	1	1	1	0	0	1	0
On['TGFBR']Off['MDM2']	0	1	1	1	0.50143	0	1	0.50143	1	1	0.49992	1	0	0	0.50142	0	1	0	1	1	1	1	1	1	1	1	0	0	1	1	1	0	1	1	1	0	1	1	1	1	1	0	1	1	1	0	1	1	0
On['p53']Off['MEK1_2']	0	1	1	1	0.49895	0	1	0.49895	1	1	0.50086	1	0	0	0.50039	0	1	0	1	1	1	1	1	1	1	1	1	0	1	1	1	0	1	1	1	0	1	1	1	1	1	0	1	1	1	0	0.49904	1	0
On['p53']Off['MSK']	0	1	1	1	0.49668	0	0	0.49668	0	1	0.49686	1	0	0	0.49806	0	1	0	1	1	1	1	1	1	1	1	1	0	0	1	0	0	1	1	1	0	1	1	1	1	1	0	1	1	1	0	0.50264	1	0
On['MSK','p53']Off[]	0	1	1	1	0.49983	0	1	0.49983	1	1	0.4995	1	0	0	0.50081	0	1	0	1	1	1	1	1	1	1	1	1	0	1	1	1	0	1	1	1	0	1	1	1	1	1	0	1	1	1	0	0.50343	1	0
On['MTK1','p53']Off[]	0	1	1	1	0.50074	0	1	0.50074	1	1	0.50278	1	0	0	0.50161	0	1	0	1	1	1	1	1	1	1	1	1	0	1	1	1	0	1	1	1	0	1	1	1	1	1	0	1	1	1	0	0.50124	1	0
On['p53']Off['MYC']	0	1	1	1	0.50017	0	1	0.50017	1	1	0.50283	1	0	0	0.50134	0	1	0	1	1	1	1	1	1	1	1	1	0	1	1	0	0	1	1	1	0	1	1	1	1	1	0	1	1	1	0	0.5015	1	0
On['MYC','p53']Off[]	0	1	1	1	0.49871	0	1	0.49871	1	1	0.50156	1	0	0	0.4998	0	1	0	1	1	1	1	1	1	1	1	1	0	1	1	1	0	1	1	1	0	1	1	1	1	1	0	1	1	1	0	0.49781	1	0
On['p21','p53']Off[]	0	1	1	1	0.49907	0	1	0.49907	1	1	0.49695	1	0	0	0.49966	0	1	0	1	1	1	1	1	1	1	1	1	0	1	1	1	0	1	1	1	0	1	1	1	1	1	0	1	1	1	0	0.49928	1	0
On['p53']Off['p38']	0	1	1	1	0.49944	0	0	0.49944	0	1	0.49694	1	0	0	0.49773	0	1	0	1	1	1	1	1	1	1	0	1	0	0	1	0	0	1	0	1	0	1	1	1	1	0	0	1	1	1	0	0.49886	1	0
On['p38','p53']Off[]	0	1	1	1	0.49802	0	1	0.49802	1	1	0.50017	1	0	0	0.49996	0	1	0	1	1	1	1	1	1	1	1	1	0	1	1	1	0	1	1	1	0	1	1	1	1	1	0	1	1	1	0	0.49824	1	0
On['p53']Off['p70']	0	1	1	1	0.50031	0	1	0.50031	1	1	0.50084	1	0	0	0.49882	0	1	0	1	1	1	1	1	1	1	1	1	0	1	1	1	0	1	1	1	0	1	1	1	1	1	0	1	1	1	0	0.50051	1	0
On['p53','p70']Off[]	0	1	1	1	0.50043	0	1	0.50043	1	1	0.49964	1	0	0	0.50114	0	1	0	1	1	1	1	1	1	1	1	1	0	1	1	1	0	1	1	1	1	1	1	1	1	1	0	1	1	1	0	0.50383	1	0
On['p53']Off['PDK1']	0	1	1	1	0.50083	0	1	0.50083	1	1	0.49995	1	0	0	0.4995	0	1	0	1	1	1	1	1	1	1	1	1	0	1	1	1	0	1	1	1	0	0	1	1	1	1	0	1	1	1	0	0.49793	1	0
On['p53','PDK1']Off[]	0	1	1	1	0.49755	0	1	0.49755	1	1	0.50049	1	0	0	0.5039	0	1	0	1	1	1	1	1	1	1	1	1	0	1	1	1	0	1	1	1	0	1	1	1	1	1	0	1	1	1	0	0.50224	1	0
On['p53']Off['PI3K']	0	1	1	1	0.50009	0	1	0.50009	1	1	0.49922	1	0	0	0.49926	0	1	0	1	1	1	1	1	1	1	1	1	0	1	1	1	0	1	1	1	0	0	0	1	1	1	0	1	1	1	0	0.50247	1	0
On['p53','PI3K']Off[]	0	1	1	1	0.50016	0	1	0.50016	1	1	0.50065	1	0	0	0.49583	0	1	0	1	1	1	1	1	1	1	1	1	0	1	1	1	0	1	1	1	0	1	1	1	1	1	0	1	1	1	0	0.50079	1	0
On['p53']Off['PKC']	0	1	1	1	0.50095	0	1	0.50095	1	1	0.49824	1	0	0	0.50234	0	1	0	1	1	1	1	1	1	1	1	1	0	1	1	1	0	1	1	1	0	1	1	0	1	1	0	1	1	1	0	0.49779	1	0
On['p53','PKC']Off[]	0	1	1	1	0.49953	0	1	0.49953	1	1	0.49989	1	0	0	0.49761	0	1	0	1	1	1	1	1	1	1	1	1	0	1	1	1	0	1	1	1	0	1	1	1	1	1	0	1	1	1	0	0.49742	1	0
On['p53']Off['PLCG']	0	1	1	1	0.49926	0	1	0.49926	1	1	0.49929	1	0	0	0.5001	0	1	0	1	1	1	1	1	1	1	1	1	0	1	1	1	0	1	1	1	0	1	1	0	0	1	0	1	1	1	0	0.50103	1	0
On['p53','PLCG']Off[]	0	1	1	1	0.49849	0	1	0.49849	1	1	0.50278	1	0	0	0.5028	0	1	0	1	1	1	1	1	1	1	1	1	0	1	1	1	0	1	1	1	0	1	1	1	1	1	0	1	1	1	0	0.5	1	0
On['p53']Off['PPP2CA']	0	1	1	1	0.49896	0	1	0.49896	1	1	0.50207	1	0	0	0.50135	0	1	0	1	1	1	1	1	1	1	1	1	0	1	1	1	0	1	1	1	0	1	1	1	1	0	0	1	1	1	0	0.49788	1	0
On['p53','PPP2CA']Off[]	0	1	1	1	0.49985	0	1	0.49985	1	1	0.50126	1	0	0	0.50029	0	1	0	1	1	1	1	1	1	1	1	1	0	1	1	1	0	1	1	1	0	1	1	1	1	1	0	1	1	1	0	0.49882	1	0
On['p53','PTEN']Off[]	0	1	1	1	0.50138	0	1	0.50138	1	1	0.5016	1	0	0	0.50109	0	1	0	1	1	1	1	1	1	1	1	1	0	1	1	1	0	1	1	1	0	1	1	1	1	1	0	1	1	1	0	0.49814	1	0
On['p53']Off['RAF']	0	1	1	1	0.49902	0	1	0.49902	1	1	0.50185	1	0	0	0.50238	0	1	0	1	1	1	1	1	1	1	1	1	0	1	1	1	0	1	1	1	0	1	1	1	1	1	0	1	0	1	0	0.49795	1	0
On['p53','RAF']Off[]	0	1	1	1	0.50024	0	1	0.50024	1	1	0.49726	1	0	0	0.49936	0	1	0	1	1	1	1	1	1	1	1	1	0	1	1	1	0	1	1	1	0	1	1	1	1	1	0	1	1	1	0	0.50073	1	0
On['p53','RAS']Off[]	0	1	1	1	0.50319	0	1	0.50319	1	1	0.49856	1	0	0	0.50021	0	1	0	1	1	1	1	1	1	1	1	1	0	1	1	1	0	1	1	1	0	1	1	1	1	1	0	1	1	1	0	0.49997	1	0
On['p53']Off['RSK']	0	1	1	1	0.50078	0	1	0.50078	1	1	0.49911	1	0	0	0.49977	0	1	0	1	1	1	1	1	1	1	1	1	0	1	1	1	0	1	1	1	0	1	1	1	1	1	0	1	1	1	0	0.50004	1	0
On['p53','RSK']Off[]	0	1	1	1	0.50089	0	1	0.50089	1	1	0.49894	1	0	0	0.50078	0	1	0	1	1	1	1	1	1	1	1	1	0	1	1	1	0	1	1	1	0	1	1	1	1	1	0	1	1	1	1	0.5012	0	0
On['p53']Off['SMAD']	0	1	1	1	0.49874	0	1	0.49874	1	1	0.49781	1	0	0	0.49884	0	1	0	1	1	1	1	1	1	1	1	1	0	1	1	1	0	1	1	1	0	1	1	1	1	1	0	1	1	1	0	0	1	0
On['p53','SMAD']Off[]	0	1	1	1	0.49827	0	1	0.49827	1	1	0.50175	1	0	0	0.50187	0	1	0	1	1	1	1	1	1	1	1	1	0	1	1	1	0	1	1	1	0	1	1	1	1	1	0	1	1	1	0	1	1	0
On['p53']Off['SOS']	0	1	1	1	0.49862	0	1	0.49862	1	1	0.50055	1	0	0	0.50273	0	1	0	1	1	1	1	1	1	1	1	1	0	1	1	1	0	1	1	1	0	1	1	1	1	1	0	1	1	1	0	0.50069	0	0
On['p53','SOS']Off[]	0	1	1	1	0.5	0	1	0.5	1	1	0.50012	1	0	0	0.50016	0	1	0	1	1	1	1	1	1	1	1	1	0	1	1	1	0	1	1	1	0	1	1	1	1	1	0	1	1	1	0	0.49927	1	0
On['p53']Off['SPRY']	0	1	1	1	0.50083	0	1	0.50083	1	1	0.5002	1	0	0	0.50019	0	1	0	1	1	1	1	1	1	1	1	1	0	1	1	1	0	1	1	1	0	1	1	1	1	1	0	1	1	1	0	0.49748	1	0
On['p53','SPRY']Off[]	0	1	1	1	0.50099	0	1	0.50099	1	1	0.49887	1	0	0	0.50048	0	1	0	1	1	1	1	1	1	1	1	1	0	1	1	1	0	1	1	1	0	1	1	1	1	1	0	1	1	1	0	0.49828	1	1
On['p53']Off['TAK1']	0	1	1	1	0.49864	0	1	0.49864	1	1	0.50282	1	0	0	0.50157	0	1	0	1	1	1	1	1	1	1	1	1	0	1	1	1	0	1	1	1	0	1	1	1	1	1	0	1	1	1	0	0.50233	1	0
On['p53','TAK1']Off[]	0	1	1	1	0.49991	0	1	0.49991	1	1	0.49818	1	0	0	0.49954	0	1	0	1	1	1	1	1	1	1	1	1	0	1	1	1	0	1	1	1	0	1	1	1	1	1	0	1	1	1	0	0.49955	1	0
On['p53']Off['TAOK']	0	1	1	1	0.50154	0	1	0.50154	1	1	0.50006	1	0	0	0.49952	0	1	0	1	1	1	1	1	1	1	1	1	0	1	1	1	0	1	1	1	0	1	1	1	1	1	0	1	1	1	0	0.50308	1	0
On['p53','TAOK']Off[]	0	1	1	1	0.501	0	1	0.501	1	1	0.49799	1	0	0	0.50071	0	1	0	1	1	1	1	1	1	1	1	1	0	1	1	1	0	1	1	1	0	1	1	1	1	1	0	1	1	1	0	0.49733	1	0
On['p53']Off['TGFBR']	0	1	1	1	0.49805	0	1	0.49805	1	1	0.50213	1	0	0	0.50335	0	1	0	1	1	1	1	1	1	1	1	1	0	1	1	1	0	1	1	1	0	1	1	1	1	1	0	1	1	1	0	0	1	0
On['p53','TGFBR']Off[]	0	1	1	1	0.50218	0	1	0.50218	1	1	0.5003	1	0	0	0.5027	0	1	0	1	1	1	1	1	1	1	1	1	0	1	1	1	0	1	1	1	0	1	1	1	1	1	0	1	1	1	0	1	1	0
[truncated: 4 more columns]

## Sheet: r10_CKs
	AKT	AP1	Apoptosis	ATF2	ATM	BCL2	CREB	DNA_damage	DUSP1	EGFR	EGFR_stimulus	ELK1	ERK	FGFR3	FGFR3_stimulus	FOS	FOXO3	FRS2	GAB1	GADD45	GRB2	Growth_Arrest	JNK	JUN	MAP3K1_3	MAX	MDM2	MEK1_2	MSK	MTK1	MYC	p14	p21	p38	p53	p70	PDK1	PI3K	PKC	PLCG	PPP2CA	Proliferation	PTEN	RAF	RAS	RSK	SMAD	SOS	SPRY
On['ATM','EGFR']Off[]	0	1	1	1	1	0	1	0.50197	1	1	0.50112	1	0	0	0.49896	0	1	0	1	1	1	1	1	1	1	1	1	0	1	1	1	0	1	1	1	0	1	1	1	1	1	0	1	1	1	0	0.49888	1	0
On['ATM','FRS2']Off[]	0	1	1	1	1	0	1	0.50038	1	1	0.4989	1	0	0	0.50134	0	1	1	1	1	1	1	1	1	1	1	1	0	1	1	1	0	1	1	1	0	1	1	1	1	1	0	1	1	1	0	0.50374	1	0
On['ATM','GRB2']Off[]	0	1	1	1	1	0	1	0.49738	1	1	0.49654	1	0	0	0.49953	0	1	0	1	1	1	1	1	1	1	1	1	0	1	1	1	0	1	1	1	0	1	1	1	1	1	0	1	1	1	0	0.50228	1	0
On['ATM','TGFBR']Off[]	0	1	1	1	1	0	1	0.50091	1	1	0.49994	1	0	0	0.50108	0	1	0	1	1	1	1	1	1	1	1	1	0	1	1	1	0	1	1	1	0	1	1	1	1	1	0	1	1	1	0	1	1	0
On['EGFR']Off['MDM2']	0	1	1	1	0.49822	0	1	0.49822	1	1	0.5018	1	0	0	0.49893	0	1	0	1	1	1	1	1	1	1	1	0	0	1	1	1	0	1	1	1	0	1	1	1	1	1	0	1	1	1	0	0.4995	1	0
On['EGFR','p53']Off[]	0	1	1	1	0.50066	0	1	0.50066	1	1	0.49657	1	0	0	0.49806	0	1	0	1	1	1	1	1	1	1	1	1	0	1	1	1	0	1	1	1	0	1	1	1	1	1	0	1	1	1	0	0.50211	1	0
On['FRS2']Off['MDM2']	0	1	1	1	0.50113	0	1	0.50113	1	1	0.50009	1	0	0	0.50339	0	1	1	1	1	1	1	1	1	1	1	0	0	1	1	1	0	1	1	1	0	1	1	1	1	1	0	1	1	1	0	0.49963	1	0
On['FRS2','p53']Off[]	0	1	1	1	0.49795	0	1	0.49795	1	1	0.49969	1	0	0	0.50157	0	1	1	1	1	1	1	1	1	1	1	1	0	1	1	1	0	1	1	1	0	1	1	1	1	1	0	1	1	1	0	0.49962	1	0
On['GRB2']Off['MDM2']	0	1	1	1	0.49868	0	1	0.49868	1	1	0.50097	1	0	0	0.49895	0	1	0	1	1	1	1	1	1	1	1	0	0	1	1	1	0	1	1	1	0	1	1	1	1	1	0	1	1	1	0	0.50092	1	0
On['GRB2','p53']Off[]	0	1	1	1	0.49669	0	1	0.49669	1	1	0.49898	1	0	0	0.49966	0	1	0	1	1	1	1	1	1	1	1	1	0	1	1	1	0	1	1	1	0	1	1	1	1	1	0	1	1	1	0	0.50245	1	0
On['TGFBR']Off['MDM2']	0	1	1	1	0.50143	0	1	0.50143	1	1	0.49992	1	0	0	0.50142	0	1	0	1	1	1	1	1	1	1	1	0	0	1	1	1	0	1	1	1	0	1	1	1	1	1	0	1	1	1	0	1	1	0
On['p53','TGFBR']Off[]	0	1	1	1	0.50218	0	1	0.50218	1	1	0.5003	1	0	0	0.5027	0	1	0	1	1	1	1	1	1	1	1	1	0	1	1	1	0	1	1	1	0	1	1	1	1	1	0	1	1	1	0	1	1	0
[truncated: 4 more columns]

## Sheet: Results
On['ATM','FRS2']Off[]
On['ATM','GRB2']Off[]
On['ATM','TGFBR']Off[]
On['FRS2']Off['MDM2']
On['FRS2','p53']Off[]
On['GRB2']Off['MDM2']
On['GRB2','p53']Off[]
On['TGFBR']Off['MDM2']
On['p53','TGFBR']Off[]
