# Supplementary material for: Global Stabilization of Boolean Networks to Control the Heterogeneity of Cellular Responses
Source: Front Physiol. 2018 Jul 17;9:774. doi: 10.3389/fphys.2018.00774 (PMC6060448; doi:10.3389/fphys.2018.00774)
Supplement: Supplementary Table S4 — Complete description of the attractors in Table 4 that are obtained by perturbation of external inputs after global stabilization by p38 = 1 and GRB2 = 1. [file Table_4.XLSX]

## Sheet: Sheet1
		Input set to 1	DNA_damage	EGFR_stimulus	FGFR3_stimulus	TGFBR_stimulus	AKT	AP1	ATF2	ATM	Apoptosis	BCL2	CREB	DUSP1	EGFR	ELK1	ERK	FGFR3	FOS	FOXO3	FRS2	GAB1	GADD45	GRB2	Growth_Arrest	JNK	JUN	MAP3K1_3	MAX	MDM2	MEK1_2	MSK	MTK1	MYC	PDK1	PI3K	PKC	PLCG	PPP2CA	PTEN	Proliferation	RAF	RAS	RSK	SMAD	SOS	SPRY	TAK1	TAOK
r9 EGFRgain; p14loss	1. Global stabilization	None	0	0	0	0	1	0	1	0	0	1	1	1	1	1	0	0	0	0	0	1	0	1	0	0	0	1	1	1	0	1	0	1	1	1	1	1	1	0	0	0	1	0	0	1	0	0	0
	2. Perturbation of external inputs	None	Cyclie
		DNA_damage	1	0	0	0	0	1	1	1	1	0	1	1	1	1	0	0	0	1	0	1	1	1	1	1	1	1	1	1	0	1	1	1	1	1	1	1	1	1	0	1	1	0	0	1	0	0	1
		EGFR_stimulus	Cyclie
		FGFR3_stimulus	Cyclie
		TGFBR_stimulus	0	0	0	1	1	1	1	0	0	1	1	1	1	1	0	0	0	0	0	1	1	1	0	1	1	1	1	1	0	1	1	1	1	1	1	1	1	0	0	0	1	0	1	1	0	1	0
		DNA_damage', 'EGFR_stimulus'	1	1	0	0	0	1	1	1	1	0	1	1	1	1	0	0	0	1	0	1	1	1	1	1	1	1	1	1	0	1	1	1	1	1	1	1	1	1	0	1	1	0	0	1	0	0	1
		'DNA_damage', 'FGFR3_stimulus'	1	0	1	0	0	1	1	1	1	0	1	1	1	1	0	0	0	1	0	1	1	1	1	1	1	1	1	1	0	1	1	1	1	1	1	1	1	1	0	1	1	0	0	1	0	0	1
		'DNA_damage', 'TGFBR_stimulus'	1	0	0	1	0	1	1	1	1	0	1	1	1	1	0	0	0	1	0	1	1	1	1	1	1	1	1	1	0	1	1	1	1	1	1	1	1	1	0	1	1	0	1	1	0	1	1
		'EGFR_stimulus', 'FGFR3_stimulus'					Cyclic
		'EGFR_stimulus', 'TGFBR_stimulus'	0	1	0	1	1	1	1	0	0	1	1	1	1	1	0	0	0	0	0	1	1	1	0	1	1	1	1	1	0	1	1	1	1	1	1	1	1	0	0	0	1	0	1	1	0	1	0
		'FGFR3_stimulus', 'TGFBR_stimulus'	0	0	1	1	1	1	1	0	0	1	1	1	1	1	0	0	0	0	0	1	1	1	0	1	1	1	1	1	0	1	1	1	1	1	1	1	1	0	0	0	1	0	1	1	0	1	0
		'DNA_damage', 'EGFR_stimulus', 'FGFR3_stimulus'	1	1	1	0	0	1	1	1	1	0	1	1	1	1	0	0	0	1	0	1	1	1	1	1	1	1	1	1	0	1	1	1	1	1	1	1	1	1	0	1	1	0	0	1	0	0	1
		'DNA_damage', 'EGFR_stimulus', 'TGFBR_stimulus'	1	1	0	1	0	1	1	1	1	0	1	1	1	1	0	0	0	1	0	1	1	1	1	1	1	1	1	1	0	1	1	1	1	1	1	1	1	1	0	1	1	0	1	1	0	1	1
		'DNA_damage', 'FGFR3_stimulus', 'TGFBR_stimulus'	1	0	1	1	0	1	1	1	1	0	1	1	1	1	0	0	0	1	0	1	1	1	1	1	1	1	1	1	0	1	1	1	1	1	1	1	1	1	0	1	1	0	1	1	0	1	1
		'EGFR_stimulus', 'FGFR3_stimulus', 'TGFBR_stimulus'	0	1	1	1	1	1	1	0	0	1	1	1	1	1	0	0	0	0	0	1	1	1	0	1	1	1	1	1	0	1	1	1	1	1	1	1	1	0	0	0	1	0	1	1	0	1	0
		'DNA_damage', 'EGFR_stimulus', 'FGFR3_stimulus', 'TGFBR_stimulus'	1	1	1	1	0	1	1	1	1	0	1	1	1	1	0	0	0	1	0	1	1	1	1	1	1	1	1	1	0	1	1	1	1	1	1	1	1	1	0	1	1	0	1	1	0	1	1
		Input set to 1	DNA_damage	EGFR_stimulus	FGFR3_stimulus	TGFBR_stimulus	AKT	AP1	ATF2	ATM	Apoptosis	BCL2	CREB	DUSP1	EGFR	ELK1	ERK	FGFR3	FOS	FOXO3	FRS2	GAB1	GADD45	GRB2	Growth_Arrest	JNK	JUN	MAP3K1_3	MAX	MDM2	MEK1_2	MSK	MTK1	MYC	PDK1	PI3K	PKC	PLCG	PPP2CA	PTEN	Proliferation	RAF	RAS	RSK	SMAD	SOS	SPRY	TAK1	TAOK
r10 FGFR3gain; p14loss	1. Global stabilization	None	0	0	0	0	1	0	1	0	0	1	1	1	0	1	0	1	0	0	0	1	0	1	0	0	0	1	1	1	0	1	0	1	1	1	1	1	1	0	0	0	1	0	0	1	0	0	0
	2. Perturbation of external inputs	None	Cyclie
		DNA_damage	Cyclie
		EGFR_stimulus	Cyclie
		FGFR3_stimulus	Cyclie
		TGFBR_stimulus	0	0	0	1	1	1	1	0	0	1	1	1	0	1	0	1	0	0	0	1	1	1	0	1	1	1	1	1	0	1	1	1	1	1	1	1	1	0	0	0	1	0	1	1	0	1	0
		DNA_damage', 'EGFR_stimulus'	Cyclie
		'DNA_damage', 'FGFR3_stimulus'	Cyclie
		'DNA_damage', 'TGFBR_stimulus'	1	0	0	1	0	1	1	1	1	0	1	1	0	1	0	1	0	1	0	1	1	1	1	1	1	1	1	1	0	1	1	1	1	1	1	1	1	1	0	1	1	0	1	1	0	1	1
		'EGFR_stimulus', 'FGFR3_stimulus'	Cyclie
		'EGFR_stimulus', 'TGFBR_stimulus'	0	1	0	1	1	1	1	0	0	1	1	1	0	1	0	1	0	0	0	1	1	1	0	1	1	1	1	1	0	1	1	1	1	1	1	1	1	0	0	0	1	0	1	1	0	1	0
		'FGFR3_stimulus', 'TGFBR_stimulus'	0	0	1	1	1	1	1	0	0	1	1	1	0	1	0	1	0	0	0	1	1	1	0	1	1	1	1	1	0	1	1	1	1	1	1	1	1	0	0	0	1	0	1	1	0	1	0
		'DNA_damage', 'EGFR_stimulus', 'FGFR3_stimulus'	Cyclie
		'DNA_damage', 'EGFR_stimulus', 'TGFBR_stimulus'	1	1	0	1	0	1	1	1	1	0	1	1	0	1	0	1	0	1	0	1	1	1	1	1	1	1	1	1	0	1	1	1	1	1	1	1	1	1	0	1	1	0	1	1	0	1	1
		'DNA_damage', 'FGFR3_stimulus', 'TGFBR_stimulus'	1	0	1	1	0	1	1	1	1	0	1	1	0	1	0	1	0	1	0	1	1	1	1	1	1	1	1	1	0	1	1	1	1	1	1	1	1	1	0	1	1	0	1	1	0	1	1
		'EGFR_stimulus', 'FGFR3_stimulus', 'TGFBR_stimulus'	0	1	1	1	1	1	1	0	0	1	1	1	0	1	0	1	0	0	0	1	1	1	0	1	1	1	1	1	0	1	1	1	1	1	1	1	1	0	0	0	1	0	1	1	0	1	0
		'DNA_damage', 'EGFR_stimulus', 'FGFR3_stimulus', 'TGFBR_stimulus'	1	1	1	1	0	1	1	1	1	0	1	1	0	1	0	1	0	1	0	1	1	1	1	1	1	1	1	1	0	1	1	1	1	1	1	1	1	1	0	1	1	0	1	1	0	1	1
[truncated: 6 more columns]
